# Supplementary material for: Construction of an SSR and RAD-Marker Based Molecular Linkage Map of Vigna vexillata (L.) A. Rich
Source: PLoS One. 2015 Sep 23;10(9):e0138942. doi: 10.1371/journal.pone.0138942 (PMC4580594; doi:10.1371/journal.pone.0138942)
Supplement: S1 Table — (XLSX) [file pone.0138942.s001.xlsx]

## Sheet: Screening
	Summary of amplification and polymorphic rate in Vigna vexillata of SSR
	and EST-SSR primer pairs from three legumes.
		Marker	No. of SSR and EST-SSR primer pairs
	Species	type	Screened	Amplified (%)	Polymorphic (%)
	azuki bean	SSR1	329	257 (78.1)	28 (8.5)
	azuki bean	EST-SSR	480	305 (63.5)	19 (4.0)
	cowpea	SSR	487	273 (56.1)	35 (7.2)
	common bean	SSR	40	39 (97.5)	1 (2.5)
	Total	-	1336	874 (65.4)	83 (6.2)
	1 One STS marker is included.

## Sheet: SSR map
	Numbers of markers and average distances between markers in each linkage group on the Vigna vexillata linkage map
		Correspondence between		No. of loci					Average distance
	Linkage	linkage groups on other	Length	azuki bean	cowpea	common bean	azuki bean		between two maker
	group	Vigna species maps	(cM)	SSR	SSR	SSR	EST-SSR	Total	loci (cM)
	1	1	31.4	1	1	0	1	3	15.7
	2	2	71.1	2	7	0	1	10	7.9
	3	3	28.4	3	0	0	6	9	3.6
	4	4	21.4	1	3	0	1	5	5.4
	5	1 and 5	40.7	3	2	0	1	6	8.1
	6	6 and 9	67.9	2	4	1	0	7	11.3
	7	4	8.6	1	5	0	1	7	1.4
	8	8	72.5	3	3	0	1	7	12.1
	9	1 and 9	93.9	4	7	0	2	13	7.8
	10	10	37.7	5	2	0	0	7	6.3
	11	11	37.9	3	1	0	4	8	5.4
	Total	-	511.5	28	35	1	18	82	7.2
	Unlinked markers: CEDG074a and VES0660

## Sheet: SSR primer
	SSR and EST-SSR primer pairs used in the present study
			Marker	Amplified product size (bp)		Linkage	Sequences (5' - 3')
	Code	Species	type	P1 (V1)	P2 (V5)	group	Forward	Reverse	Motif or repeat region	Source
	CEDG001	azuki bean	genomic SSR	-a	-a	-b	ACTATGCAGAAAGACGCTCC	GGCTCTCTCTTTCTCCATTC	(AG)26	Wang et al. (2004)1
	CEDG002	azuki bean	genomic SSR	137	-	11	AACTGGACCTGTACCACTGG	TACAGCCTTCTTGCACCATG	(AG)16	Wang et al. (2004)1
	CEDG003	azuki bean	genomic SSR	249	247	5	CCACTTTCTCTTGACTTTGC	GACCAAAGTGAAGCCAAGAG	(AG)9···(AG)13	Wang et al. (2004)1
	CEDG005	azuki bean	genomic SSR	244	244	-	CCAGTACCCCATATTCTTCC	CTGTGTTTGGGTTGTGATGG	(AG)22	Wang et al. (2004)1
	CEDG006	azuki bean	genomic SSR	145	145	-	AATTGCTCTCGAACCAGCTC	GGTGTACAAGTGTGTGCAAG	(AG)10AA(AG)18	Wang et al. (2004)1
	CEDG007	azuki bean	genomic SSR	172	172	-	GAAGTTGACACTCATCCACC	GTGCAGCCACTACATGAATG	(AG)17	Wang et al. (2004)1
	CEDG008	azuki bean	genomic SSR	77	77	-	AGGCGAGGTTTCGTTTCAAG	GCCCATATTTTTACGCCCAC	(AG)26	Wang et al. (2004)1
	CEDG009	azuki bean	genomic SSR	105	105	-	TCTTGAGCAAAGAGAGGG	GAAGCTTGAGAGCATCTC	(AG)26	Wang et al. (2004)1
	CEDG010	azuki bean	genomic SSR	190	190	-	TGGGCTACCAACTTTTCCTC	TGAGCGACATCTTCAACACG	(AG)21	Wang et al. (2004)1
	CEDG011	azuki bean	genomic SSR	155	155	-	CCCAACCAAAGCGTTTTG	CTTCTAGACTCTGAGCACTG	(AG)16AA(AG)6	Wang et al. (2004)1
	CEDG012	azuki bean	genomic SSR	115	115	-	AAAGCACTCGTAGTGGATGG	TAGCAACACCTAGGAGCAAC	(AG)22	Wang et al. (2004)1
	CEDG013	azuki bean	genomic SSR	164	164	-	CGTTCGAGTTTCTTCGATCG	ACCATCCATCCATTCGCATC	(AG)22	Wang et al. (2004)1
	CEDG014	azuki bean	genomic SSR	-	-	-	GCTTGCATCACCCATGATTC	AAGTGATACGGTCTGGTTCC	(AT)12(AG)14	Wang et al. (2004)1
	CEDG015	azuki bean	genomic SSR	168	168	-	CCCGATGAACGCTAATGCTG	CGCCAAAGGAAACGCAGAAC	(AG)27	Wang et al. (2004)1
	CEDG016	azuki bean	genomic SSR	128	128	-	TTAGTTCACTCCGCTTGGTC	CACGTCATCCTCTGTTAGAC	(AG)26	Wang et al. (2004)1
	CEDG018	azuki bean	genomic SSR	292	292	-	AGCGTGTTTGTGGTGATAGC	ACACAGGAACGAACAAACCC	(AG)32	Wang et al. (2004)1
	CEDG019	azuki bean	genomic SSR	-	-	-	TATAGAGAGGCGAGAAAGGG	AGGGAAACTCAGAACACGTG	(AG)19	Wang et al. (2004)1
	CEDG020	azuki bean	genomic SSR	132	132	-	TATCCATACCCAGCTCAAGG	GCCATACCAAGAAAGAGG	(AT)18(AG)20	Wang et al. (2004)1
	CEDG021	azuki bean	genomic SSR	138	138	-	GCAGAATTTTAGCCACCGAG	AAAGGATGCGAGAGTGTAGC	(AG)26	Wang et al. (2004)1
	CEDG022	azuki bean	genomic SSR	443	443	-	AGGAATGTGAGATTTG	AATCGCTTCAAGGTCAAGCC	(AG)27	Wang et al. (2004)1
	CEDG023	azuki bean	genomic SSR	91	91	-	GCTCTCCATGAATGGAGTTG	TCATTCATTCACCCCTCC	(AG)16	Wang et al. (2004)1
	CEDG024	azuki bean	genomic SSR	146	152	6	CATCTTCCTCACCTGCATTC	TTTGGTGAAGATGACAGCCC	(AG)18	Wang et al. (2004)1
	CEDG025	azuki bean	genomic SSR	-	-	-	TAGTCAACCGTTACTATGCC	CGAGAAAAATGAATCTCCCC	(AT)10(AG)16	Wang et al. (2004)1
	CEDG026	azuki bean	genomic SSR	137	137	-	TCAGCAATCACTCATGTGGG	TGGGACAAACCTCATGGTTG	(AG)26	Wang et al. (2004)1
	CEDG027	azuki bean	genomic SSR	120	120	-	ACTTGGGGTTTGAGATGTGG	TCATTTTGGCCACTCAGTGC	(AG)60	Wang et al. (2004)1
	CEDG028	azuki bean	genomic SSR	317	317	-	ACACCTAGGAGCAACATAGG	TATGGTGGGATGATGAGGAC	(AG)22	Wang et al. (2004)1
	CEDG029	azuki bean	genomic SSR	114	114	-	GATTGCTTTTAGCAGAGGGC	GAAGAAACCCATCTCGATCC	(AG)8	Wang et al. (2004)1
	CEDG030	azuki bean	genomic SSR	122	122	-	TGAGGGAATGGGAGAGAGGC	TCCGCAGATAGAGGCTCACG	(AG)45	Wang et al. (2004)1
	CEDG032	azuki bean	genomic SSR	52	52	-	AGCGAGTGGTGTTAGGGAAG	CGCCAAATCTGCACCAGTTG	(AG)26	Wang et al. (2004)1
	CEDG033	azuki bean	genomic SSR	-	-	-	GTGAGGTAGCTATGTAGCAC	ACTGGACCGACAAGAGTAAG	(AG)41	Wang et al. (2004)1
	CEDG034	azuki bean	genomic SSR	103	103	-	ACCCTCATTCTCTCACTGAG	CAAATTGCCCTCCATCAACC	(AG)18	Wang et al. (2004)1
	CEDG035	azuki bean	genomic SSR	154	154	-	TGGTTGGATGAAAGCGTGTG	CTGTGAGAGGTTCAACAACC	(AG)14	Wang et al. (2004)1
	CEDG036	azuki bean	genomic SSR	182	182	-	CAGGTATTGTGCAGAGAGAC	TGCACCCAAAAGCTGTAAGC	(AG)19(AAAG)3	Wang et al. (2004)1
	CEDG037	azuki bean	genomic SSR	105	105	-	GAAGAAGAACCCTACCACAG	CACCAAAAACGTTCCCTCAG	(AG)16AC(AG)8	Wang et al. (2004)1
	CEDG040	azuki bean	genomic SSR	82	82	-	CGGGGTATAACTTTAGCAGC	TAACTCAGGCAAAGGTAGCC	(AG)14	Wang et al. (2004)1
	CEDG041	azuki bean	genomic SSR	98	98	-	GCTGCATCTCTATTCTCTGG	GCCAACTAGCCTAATCAG	(AG)21	Wang et al. (2004)1
	CEDG042	azuki bean	genomic SSR	173	173	-	CACAGTGGTTTGGGCAACAG	TCAGAGGTTCCCATTTCCCG	(AG)15	Wang et al. (2004)1
	CEDG043	azuki bean	genomic SSR	123	123	-	AGGATTGTGGTTGGTGCATG	ACTATTTCCAACCTGCTGGG	(AG)14	Wang et al. (2004)1
	CEDG044	azuki bean	genomic SSR	151	141	11	TCAGCAACCTTGCATTGCAG	TTTCCCGTCACTCTTCTAGG	(GT)10AT(AG)18	Wang et al. (2004)1
	CEDG048	azuki bean	genomic SSR	190	192	1	TCTCTTCCTCTATGGCTTGG	GCTCCTCTTTTTGCTGCATC	(AG)20(TG)3TC(TG)4(AG)12	Wang et al. (2004)1
	CEDG049	azuki bean	genomic SSR	93	93	-	GGAAGTTTCGAAGACGAACG	ATTGGGTTTGGCGGTTTAGG	(GAGAGAGC)3G(AG)3AAC(GAGAGAGC)4	Wang et al. (2004)1
	CEDG050	azuki bean	genomic SSR	236	236	-	GGCAGAATCGTACAAGTG	GTCAGATTCTCGCTTGCATG	(AG)12	Wang et al. (2004)1
	CEDG051	azuki bean	genomic SSR	221	221	-	AAACATACCCCTGGCAGTTCC	TTCTGACCTAAGAAAGAGCCTGG	(AG)12	Wang et al. (2004)1
	CEDG052	azuki bean	genomic SSR	99	99	-	CAAACCCTTAAGCTAGGGCTG	GGCAAGTGGTGCGCTCCTC	(AG)27	Wang et al. (2004)1
	CEDG053	azuki bean	genomic SSR	105	105	-	CGTTGCAGAGCGGTGGTGG	GCCTTTGCTTCCCATCCATG	(TG)8(AG)14	Wang et al. (2004)1
	CEDG056	azuki bean	genomic SSR	146	146	-	TTCCATCTATAGGGGAAGGGAG	GCTATGATGGAAGAGGGCATGG	(AG)14	Wang et al. (2004)1
	CEDG057	azuki bean	genomic SSR	-	-	-	GGGTGATCTTCCCCAAAATCG	GACAAATTCTCTGATGCCATTCC	(AG)4GG(AG)12	Wang et al. (2004)1
	CEDG059	azuki bean	genomic SSR	235	235	-	AGAAAAGGGTGGCCTCGTTG	GCAGGCATTTCCATCGCAG	(AG)8···(AG)18	Wang et al. (2004)1
	CEDG060	azuki bean	genomic SSR	-	-	-	TGCATCGTCTCATGCGACCAG	ATTCTGGCAGCGGAGAAACC	(AG)13	Wang et al. (2004)1
	CEDG061	azuki bean	genomic SSR	335	335	-	CAACGAAGGTATACGTGCCAAG	TCGGTCTTACACCGAACGCTC	(AT)16(AG)11	Wang et al. (2004)1
	CEDG062	azuki bean	genomic SSR	-	-	-	ATAAAAGCGGTGGCGACG	TGTTTGGACACCGCCAACAAG	(AG)28	Wang et al. (2004)1
	CEDG063	azuki bean	genomic SSR	113	113	-	TTGGAAACAATTATTGGAGGTGC	GGTGCTCTTGGACGGCTGG	(AG)12	Wang et al. (2004)1
	CEDG064	azuki bean	genomic SSR	-	-	-	TGTAAGGTCACTTTGGCCTCAAG	TTAAGTTGACTCGTTGCCCTTTG	(AG)10	Wang et al. (2004)1
	CEDG065	azuki bean	genomic SSR	221	221	-	GGAATTTTGAGAACGGATTTGC	CCACCGACCACGGCCTTC	(AG)10···(AG)18	Wang et al. (2004)1
	CEDG066	azuki bean	genomic SSR	211	211	-	AGTAAAACAAGAACCCTCCCAAG	GTATTAAAATTTGGGGTGGTGG	(AG)9	Wang et al. (2004)1
	CEDG067	azuki bean	genomic SSR	73	73	-	AGACTAAGTTACTTGGGCAACCAG	TGACGGCCCGGCTCTCC	(AG)14	Wang et al. (2004)1
	CEDG068	azuki bean	genomic SSR	218	218	-	TCTCCATAGGAACCCCTGAAAG	TGGGATCAGTGAATTCGCCAG	(AG)16	Wang et al. (2004)1
	CEDG069	azuki bean	genomic SSR	-	-	-	GGTGGAGTCGTAGTGGTTCGGTG	CGGACCACCTTTACCGGACC	(AG)31	Wang et al. (2004)1
	CEDG070	azuki bean	genomic SSR	214	214	-	CCGATCAAACTCTCCATGCTCG	TAATTTCATTGCTTTTCCCTCC	(AG)9G(AG)3	Wang et al. (2004)1
	CEDG071	azuki bean	genomic SSR	248	248	-	GGTCCATTGAGACGGATCGAG	TCCCACCTCAGCGGAATCC	(AG)9	Wang et al. (2004)1
	CEDG072	azuki bean	genomic SSR	111	111	-	TTACAGCAGAATAGCCCTAGATGC	GAGGCAGAAAAGGACTTCACTTCA	(AG)8	Wang et al. (2004)1
	CEDG073	azuki bean	genomic SSR	131	131	-	CCCCGAAATTCCCCTACAC	AACACCCGCCTCTTTCTCC	(AG)24	Wang et al. (2004)1
	CEDG074	azuki bean	genomic SSR	213/488	210/484	7/10	CGAGTGAATGGAAGGGAGTC	ATTCTCACAGCACGGACCAC	(AG)24	Wang et al. (2004)1
	CEDG075	azuki bean	genomic SSR	235	235	-	GCGACCTCGAAAATGGTGGTTT	TCACCAACTCACTCGCTCACTG	(AG)4AA(AG)4···(AG)8	Wang et al. (2004)1
	CEDG076	azuki bean	genomic SSR	175	175	-	GGTGGTTTACTTACTGGCATTT	GGTCTATTCCACCATCTATCAA	(AG)36	Wang et al. (2004)1
	CEDG077	azuki bean	genomic SSR	178	174	4	ATCCCGTGACCCTTCTTCCT	GCTCAAGCGAAAACCCAGCA	(AG)8	Wang et al. (2004)1
	CEDG080	azuki bean	genomic SSR	221	221	-	CACGTTGGAGGAAGTGACGC	CATCGGCCACCACAGAACCA	(AG)8···(AG)6	Wang et al. (2004)1
	CEDG081	azuki bean	genomic SSR	-	-	-	TGTGGGTGTTTTATGCTTTGTG	GTATTCGGTCATTCGATCTTAC	(AG)26AA(AG)14	Wang et al. (2004)1
	CEDG082	azuki bean	genomic SSR	114	114	-	CACTCAAATAGGATTTGGTTGC	ACAATGTTGCATATCCCTTTCC	(AG)18	Wang et al. (2004)1
	CEDG084	azuki bean	genomic SSR	164	164	-	ATCAACTGAGGAGCATCATCGA	CAACATTTCAACCTTGGGACAG	(AG)13	Wang et al. (2004)1
	CEDG085	azuki bean	genomic SSR	140	140	-	AGCATGGAATCTCAGACTGAGACA	AACAAGATCGAAGAAGTCGCTCAC	(AG)6TT(AG)6AC(AG)5AC(AG)6TT(AG)3	Wang et al. (2004)1
	CEDG086	azuki bean	genomic SSR	123	123	-	GAGTTTACAACAGATGGGGCTAA	AGGTCTTGATTGACTTTCTGGGT	(AG)11	Wang et al. (2004)1
	CEDG087	azuki bean	genomic SSR	110	110	-	CCTCTTGAAATTCTCCTTGA	CCTCTTGTGAACCTCAATAA	(AG)10	Wang et al. (2004)1
	CEDG088	azuki bean	genomic SSR	133	133	-	TCTTGTCATTTAGCACTTAGCACG	TTGTTGTTTACTAAGAGCCCGTGT	(AG)7	Wang et al. (2004)1
	CEDG089	azuki bean	genomic SSR	118	118	-	TGGTTGGACACTCTAACCGGTGT	AGGGCAGACAAAGGAGGGTAGTG	(AG)5	Wang et al. (2004)1
	CEDG090	azuki bean	genomic SSR	129	129	-	ATAAGTAGAAATTGGTTCAAATG	GGTTCGTTAAAGTAACTTTTAAT	(AG)28	Wang et al. (2004)1
	CEDG091	azuki bean	genomic SSR	183	184	7	CTGGTGGAACAAAGCAAAAGAGT	TGCGTCTTGGTGCAAAGAAGAAA	(AG)7	Wang et al. (2004)1
	CEDG092	azuki bean	genomic SSR	128	128	-	TCTTTTGGTTGTAGCAGGATGAAC	TACAAGTGATATGCAACGGTTAGG	(AG)17	Wang et al. (2004)1
	CEDG093	azuki bean	genomic SSR	218	218	-	AAAACCCATGTAAAAGTTCA	CAATCCATTCCCTTCTTAAT	(AG)4AA(AG)2AA(AG)4	Wang et al. (2004)1
	CEDG094	azuki bean	genomic SSR	169	169	-	TTGAGACGAAGGTTCGACACGA	AATTGGATGCTGGCTGAAGAAG	(AG)5	Wang et al. (2004)1
	CEDG095	azuki bean	genomic SSR	169	169	-	TAAATAGGCACCTCCTCAGCGTC	TACCTGGAGTAGTAGGGCTTGCA	(AG)3G(AG)6	Wang et al. (2004)1
	CEDG096	azuki bean	genomic SSR	117	117	-	TTACGAAACTGTGGCCTTCAT	TGAACAAAGATGACTTCGGTG	(AG)9	Wang et al. (2004)1
	CEDG097	azuki bean	genomic SSR	105	105	-	GTAAGCCGCATCCATAATTCCA	TGCGAAAGAGCCGTTAGTAGAA	(AG)7	Wang et al. (2004)1
	CEDG098	azuki bean	genomic SSR	107	105	11	AAAGGAGTAGAAGGTGCATA	ACAAAATTGGTTGACTCACC	(AG)5···(AG)9	Wang et al. (2004)1
	CEDG099	azuki bean	genomic SSR	208	208	-	TGGGTGAGCATGGATGTGGA	GGTTCAAGGTGGAAGGCAGA	(AG)7	Wang et al. (2004)1
	CEDG100	azuki bean	genomic SSR	178	178	-	CCCATCAAGTAACTACATAACA	ATGTGGGACTGGACAAATAAAA	(AG)4A(AG)2A(AG)3	Wang et al. (2004)1
	CEDG101	azuki bean	genomic SSR	-	-	-	CAAGCTCTTTGGTTTATTTAGCA	GAGAAAATTAAATTCCTTTCAGC	(AG)8AA(AG)4	Wang et al. (2004)1
	CEDG102	azuki bean	genomic SSR	133	133	-	GCCAAGGTGAACGGTGGTG	GAGCGAGAATGGCGGAAGG	(AG)29	Wang et al. (2004)1
	CEDG103	azuki bean	genomic SSR	-	-	-	CACCGCTGTCCATTGAAGTATTA	TCTTAGAGTGCCCTGTGAGATTG	(AG)37	Wang et al. (2004)1
	CEDG104	azuki bean	genomic SSR	277	277	-	TATGGCCCGAGCAAACCTTG	CCGTTCGGTCTTCGGTTGAA	(AG)13	Wang et al. (2004)1
	CEDG105	azuki bean	genomic SSR	322	322	-	AAACGGAACGGGCTGGAGG	TGTGACGTGGCGAGGGATG	(AG)9···(AG)3G(AG)3···(AG)4	Wang et al. (2004)1
	CEDG106	azuki bean	genomic SSR	176	176	-	GCCTTTGACTCTGACCCTCTT	AGCCTCCTCAGGGATGACTTT	(AG)10	Wang et al. (2004)1
	CEDG107	azuki bean	genomic SSR	109	109	-	GAAGTTGACCTTCAATGGAGAAAA	TTGTAGCGTAAAATTAATCCACGC	(AG)5CG(AG)10	Wang et al. (2004)1
	CEDG108	azuki bean	genomic SSR	122	122	-	TCCCAGCTACCCACCTCT	CTTCTACCCAGCCAAACC	(AG)14	Wang et al. (2004)1
	CEDG109	azuki bean	genomic SSR	-	-	-	TATGCCATGTCAAGTCACCATTA	CCTAACTCCAAAGAATCCCATCA	(AG)26	Wang et al. (2004)1
	CEDG111	azuki bean	genomic SSR	212	212	-	TGGAAGTTTCCAAGAGGGTTTTC	TCTCACCACCTTTTACCTTCTCA	(AT)7(AG)14	Wang et al. (2004)1
	CEDG112	azuki bean	genomic SSR	111	111	-	GCAATATTCGCATTATTCATTCA	GTGTTTCAAAGCACTATACTTAA	(AT)18(AG)20	Wang et al. (2004)1
	CEDG113	azuki bean	genomic SSR	90	90	-	ATGGCGTTGGAGTTATAGACG	GTTTGACCCTACTGCGTTGTT	(AG)13	Wang et al. (2004)1
	CEDG114	azuki bean	genomic SSR	477	477	-	GAACCTTGATGAAGGGGTAA	GATCACAAAGCAAAGCACAT	(AG)20(AT)8(GT)8	Wang et al. (2004)1
	CEDG115	azuki bean	genomic SSR	-	-	-	GGCTCATTGTACCACTGGATAT	ATGCCTCCTTTCAGGTGATTGT	(AT)13(AG)14	Wang et al. (2004)1
	CEDG116	azuki bean	genomic SSR	125	123	10	TTGTATCGAAACGACGACGCAGAT	AACATCAACTCCAGTCTCACCAAA	(AG)4AA(AG)12	Wang et al. (2004)1
	CEDG117	azuki bean	genomic SSR	84	84	-	GTACACTTCCACTAATCCAAAATT	TGGTACCTTCCTTATCTGAAATTA	(AG)21(AT)30	Wang et al. (2004)1
	CEDG118	azuki bean	genomic SSR	160	160	-	AACCCAACCAACCCTTGTGGTAAG	GCTGGAATCATAATACCGCCTTGT	(AG)21	Wang et al. (2004)1
	CEDG119	azuki bean	genomic SSR	364	364	-	GAATACATCAGGTACGGGGACT	ATCTCCTTTACCGTGCTCAGTC	(AT)15GT(AT)12(AG)15	Wang et al. (2004)1
	CEDG121	azuki bean	genomic SSR	105	105	-	CTTTCAAAATAATGTTGAGGCATA	CAATACATAAATAACCTTTTCTGC	(AG)18	Wang et al. (2004)1
	CEDG124	azuki bean	genomic SSR	216	216	-	AGCAAATTATTGGATGAAAG	TTATTTGGAATACGGATTGT	(AG)9	Wang et al. (2004)1
	CEDG125	azuki bean	genomic SSR	-	-	-	TGGAATATACTGTTTAATAGAG	AGATTAATTTGATCACTCATTC	(AT)14(AG)12	Wang et al. (2004)1
	CEDG126	azuki bean	genomic SSR	-	-	-	GGCATGAATGATTTTGACATGG	GTTCAATACGTGATTTTTGACATC	(AT)8AA(AT)16(AG)33	Wang et al. (2004)1
	CEDG127	azuki bean	genomic SSR	213	213	-	GGTTAGCATCTGAGCTTCTTCGTC	CTCCTCACTTGGTCTGAAACTC	(TG)3(AG)9	Wang et al. (2004)1
	CEDG128	azuki bean	genomic SSR	186	186	-	CTGCCAAAGATGGACAACTTGGAC	GCCAACCATCATCACAGTGC	(AG)11	Wang et al. (2004)1
	CEDG129	azuki bean	genomic SSR	-	-	-	GCTTAGCAAGGTGAGAGCTTTC	GAACAGCTTCCCATGGTTGC	(AG)12	Wang et al. (2004)1
	CEDG130	azuki bean	genomic SSR	235	237	8	GTTGCGTGGATGATCCTACTTCAC	CTAACACAAGGAGATAGTGCCAC	(AG)5AA(AG)9	Wang et al. (2004)1
	CEDG131	azuki bean	genomic SSR	96	96	-	CCTTTTTCTTCCTACCCTCTACC	CACCACCTAGCTGTTGCTAG	(AG)12	Wang et al. (2004)1
	CEDG132	azuki bean	genomic SSR	143	143	-	GGGTGTAATCCGTCAGAGGC	CTTCCCCCTCTTCCGTTCTC	(AG)3CG(AG)4	Wang et al. (2004)1
	CEDG133	azuki bean	genomic SSR	120	120	-	GCATACATAATGTGGTGAGATG	GTCTCGTGCCTTTCACAC	(AT)3(AG)11	Wang et al. (2004)1
	CEDG134	azuki bean	genomic SSR	402	402	-	CTCCGTGTTGAAACAATGACG	GGTCTTTCTGATCTACGAACTTG	(AG)11	Wang et al. (2004)1
	CEDG135	azuki bean	genomic SSR	267	267	-	GAGGAGAGAGAAATAGCCTG	GAGAGAGACTGCATGATGATG	(AG)11	Wang et al. (2004)1
	CEDG136	azuki bean	genomic SSR	174	184	2	GTTCCAAGTCTCCAATCCGTAC	CACTTCACTAGAACTGGTTCAG	(AT)15(AG)15	Wang et al. (2004)1
	CEDG137	azuki bean	genomic SSR	-	-	-	GGTAATCATTTCCAAACAAG	GTGAAGAATTGATTAGGTTG	(AG)10	Wang et al. (2004)1
	CEDG138	azuki bean	genomic SSR	88	88	-	CATTCTGATGAAAAGATCAAGG	CAATGTAACAGACTCACTGG	(AG)21	Wang et al. (2004)1
	CEDG139	azuki bean	genomic SSR	180	180	-	CAAACTTCCGATCGAAAGCGCTTG	GTTTCTCCTCAATCTCAAGCTCCG	(AG)19	Wang et al. (2004)1
	CEDG140	azuki bean	genomic SSR	248	248	-	GGCTCTTGTTATAAACCGCAGC	GATTTCGGTGATGTGCGAGG	(AG)16AA(AG)5	Wang et al. (2004)1
	CEDG141	azuki bean	genomic SSR	134	134	-	CCAGGCATCCATGATGACC	GAAGTTGTTGGTAATGGTTGCCTC	(AT)6(AG)13	Wang et al. (2004)1
	CEDG143	azuki bean	genomic SSR	109	109	-	GATGAACTCGTCTCGCTCATCG	CTGGACGCGTCTACTCAGAC	(AG)12	Wang et al. (2004)1
	CEDG144	azuki bean	genomic SSR	114	114	-	CAGTTACGAGTCTTGAACTTCAGC	CAGCTCTGTACAAAGCTGTAACTG	(AG)16	Wang et al. (2004)1
	CEDG145	azuki bean	genomic SSR	134	134	-	CTCTGTCTCTACAACTGTGAGTAC	CAGTTGAGAAGCACAAGCACC	(CA)3C(AG)10	Wang et al. (2004)1
	CEDG146	azuki bean	genomic SSR	175	179	6	GGTGATCGGATTTCAGAG	GGAGAAGAGAATAGAGACG	(AG)9	Wang et al. (2004)1
	CEDG147	azuki bean	genomic SSR	251	251	-	CTCCGTCGAAGAATTGGTTGAC	GCAAAAATGTGGCGTTTGGTTGC	(AG)10	Wang et al. (2004)1
	CEDG148	azuki bean	genomic SSR	-	-	-	GGGAAGAAGGAAGAAGGAACC	GTGACAAAACACCTGTAGCCATCC	(AG)3TG(AG)9	Wang et al. (2004)1
	CEDG149	azuki bean	genomic SSR	144	144	-	GGCTGAAGGTGATGACAGAAG	GGCACTGGTTTTCTAAGGTTGTTG	(AT)12(AG)16	Wang et al. (2004)1
	CEDG150	azuki bean	genomic SSR	159	159	-	GAAGGGAATGAAAATGAAACCC	GTTCAATCCATTCAGTCTCC	(AG)14	Wang et al. (2004)1
	CEDG151	azuki bean	genomic SSR	176	183	8	GTAGAACAGTTATGACACATG	TGTTAACTTCGTTGGGTACAC	(AC)6(AT)4(AGAT)3(AG)17	Wang et al. (2004)1
	CEDG152	azuki bean	genomic SSR	-	-	-	CTTATCTATTGTCTACCACCAC	GGAGTGAATAAGCATCAAGTG	(AT)13TT(AT)7(AG)22	Wang et al. (2004)1
	CEDG153	azuki bean	genomic SSR	-	-	-	CAAGTATCTACCAACACAACTG	CAATCGAGAATCTTGCATAAG	(AT)16(AG)17	Wang et al. (2004)1
	CEDG154	azuki bean	genomic SSR	193	193	-	GTCCTTGTTTTCCTCTCCATGG	CATCAGCTGTTCAACACCCTGTG	(AG)14	Wang et al. (2004)1
	CEDG155	azuki bean	genomic SSR	-	-	-	GCCAGAAACGGAACTAAGAACG	CATCTCGAAGTTCAATAGGTC	(AT)13(AG)21	Wang et al. (2004)1
	CEDG156	azuki bean	genomic SSR	169	169	-	CGCGTATTGGTGACTAGGTATG	CTTAGTGTTGGGTTGGTCGTAAGG	(AG)13	Wang et al. (2004)1
	CEDG157	azuki bean	genomic SSR	218	218	-	CTGTCCGTGAGTCCTGTAAC	GGACCATGAGAGGTTCTG	(AG)5CG(AG)4	Wang et al. (2004)1
	CEDG158	azuki bean	genomic SSR	458	458	-	GGTCAACAGGAGAGTTAG	CCACCTCCTCATTACCATTC	(AG)19	Wang et al. (2004)1
	CEDG159	azuki bean	genomic SSR	217	240	3	CACATGTGACCAACAAGATTC	GAGTTAGTGATTGAACGAAGC	(AG)17(AAAGAGAG)3	Wang et al. (2004)1
	CEDG164	azuki bean	genomic SSR	-	-	-	GTTGCATTTGAAAGTGAGACC	CTATATCCAGACCCAAAGG	(AG)27	Wang et al. (2004)1
	CEDG165	azuki bean	genomic SSR	136	136	-	GCTCTGTCAGTTCCCACTAC	GGTCCTGAACCCAGATGAAC	(AG)10	Wang et al. (2004)1
	CEDG166	azuki bean	genomic SSR	-	-	-	GGTACAACATTCTTCTATTTG	GGCTTATGAGTTTATCTTATC	(AT)12(AG)18	Wang et al. (2004)1
	CEDG167	azuki bean	genomic SSR	128	128	-	CATAAAGGTACAATTGTGAGG	GCAAGATACATTAATGCTCC	(AG)10	Wang et al. (2004)1
	CEDG168	azuki bean	genomic SSR	127	127	-	CTGCTTGGTGTTGAAGCTTC	CATTCTACATTCCAGACCTGC	(AT)12(AG)14	Wang et al. (2004)1
	CEDG169	azuki bean	genomic SSR	135	135	-	CAATGCGCGTCTGCAAGTTG	CAAGGAACTTGTGGGTCC	(AG)4···(AG)9	Wang et al. (2004)1
	CEDG170	azuki bean	genomic SSR	-	-	-	CTTCTAAGGTTGGAACAGCTTC	GGAAGCTTAAGAAGGTGAGAGC	(AG)14	Wang et al. (2004)1
	CEDG171	azuki bean	genomic SSR	185	185	-	CTTGAGAACCAACTCGAACTTC	GGGAAATCGAAGAGGGACAG	(AG)14	Wang et al. (2004)1
	CEDG172	azuki bean	genomic SSR	202	204	9	GCTGACGTAGGTGACAACC	CGGCTTGTGCTTCATTGTCTG	(AG)13	Wang et al. (2004)1
	CEDG173	azuki bean	genomic SSR	202	202	-	GATAAGAGATGCATCACTC	CTTCTCTTCCATCACATCTG	(AG)23	Wang et al. (2004)1
	CEDG174	azuki bean	genomic SSR	186	186	-	GAGGGATCTCCAAAGTTCAACGG	GAAGGCTCCGAAGTTGAAGGTTG	(AG)22	Wang et al. (2004)1
	CEDG175	azuki bean	genomic SSR	149	149	-	GAAACGCAACGATGAGAAGTG	GAGCGTCTTCTTCTACTGCG	(AG)18	Wang et al. (2004)1
	CEDG176	azuki bean	genomic SSR	131	131	-	GGTAACACGGGTTCAGATGCC	CAAGGTGGAGGACAAGATCGG	(AG)12	Wang et al. (2004)1
	CEDG177	azuki bean	genomic SSR	-	-	-	CCTGGAAGAGTGTGTACATGTC	GCAAGAACCCAAACAAAGCATGAG	(AG)38	Wang et al. (2004)1
	CEDG178	azuki bean	genomic SSR	151	151	-	CGGAAGAAGAACGCAGAGTG	GCATCAACAAGGACTTCTGC	(AG)10G(AG)5	Wang et al. (2004)1
	CEDG180	azuki bean	genomic SSR	115	115	-	GGTATGGAGCAAAACAATC	GTGCGTGAAGTTGTCTTATC	(AG)11	Wang et al. (2004)1
	CEDG181	azuki bean	genomic SSR	128	128	-	CGCGAGATCTGGATCGTTGATC	GCAGTACGGTAACGTCCTTGAC	(AG)13	Wang et al. (2004)1
	CEDG182	azuki bean	genomic SSR	-	-	-	GCCCTAGCAGCAGTTCAGAG	CCCTCATCATCGGATTCGATCC	(AG)37	Wang et al. (2004)1
	CEDG183	azuki bean	genomic SSR	-	-	-	CTCATGGTGCTACCAACCTTGAC	CCATCGCCAACGAAGTTGGTC	(AG)17	Wang et al. (2004)1
	CEDG184	azuki bean	genomic SSR	251	251	-	GAGTAGCCAAAGAACTTTGTAG	CTTCTGATTCTTCACGACCC	(AG)14	Wang et al. (2004)1
	CEDG185	azuki bean	genomic SSR	258	258	-	CACGAACCGGTTACAGAGCG	CATCGCATTCCCTTCGCTGC	(AG)16	Wang et al. (2004)1
	CEDG186	azuki bean	genomic SSR	105	105	-	GGATGGGAGAGTAAGAAG	GCATGGCATGATGACTTG	(AG)18	Wang et al. (2004)1
	CEDG187	azuki bean	genomic SSR	136	136	-	GACCAACTGAACGGTCAGG	CTCAGCACATGTTGCGTGTC	(AG)7CG(AG)7	Wang et al. (2004)1
	CEDG189	azuki bean	genomic SSR	121	121	-	GGAAAGGTATACGCACAGAG	GGACTCACATTGCCATATGG	(AG)14	Wang et al. (2004)1
	CEDG190	azuki bean	genomic SSR	-	-	-	CTTATACTGCCATCACTTAC	GGATCACTCTTCAAACATAC	(AT)16AGAA(AG)21	Wang et al. (2004)1
	CEDG191	azuki bean	genomic SSR	135	135	-	CAATAAGCAATCTGTGGAGAG	CTGCAGGAAACTTGGAATTGC	(AG)21	Wang et al. (2004)1
	CEDG193	azuki bean	genomic SSR	217	217	-	GTGTGAAACATGTAGCACGGTG	GGTTCTCTCTCTCCCTCTC	(AG)15(TG)8	Wang et al. (2004)1
	CEDG195	azuki bean	genomic SSR	150	150	-	GAGGGTCTCCACTTTTGAAACCC	GATACTAAGGCTTTCTCCACCCAC	(AG)11	Wang et al. (2004)1
	CEDG196	azuki bean	genomic SSR	149	149	-	GGTGTAGGTTATGGCTGAAACC	CCCACGTTCTTCTATACTCTTCC	(AG)10	Wang et al. (2004)1
	CEDG197	azuki bean	genomic SSR	271	271	-	CCACCAACACTAACCAGTGAAG	GTTCTCCCCACACACACCATAC	(AG)17	Wang et al. (2004)1
	CEDG198	azuki bean	genomic SSR	214	214	-	CAAGGAAGATGGAGAGAATC	CCTTCTAAGAACAGTGACATG	(AG)30	Wang et al. (2004)1
	CEDG199	azuki bean	genomic SSR	681	681	-	CTAAGTGGAACCCATATCCAAG	CAATTCACCCCCTCTTGGTTG	(AG)13(AT)29(AC)19AT(AC)6	Wang et al. (2004)1
	CEDG200	azuki bean	genomic SSR	96	96	-	GAGTGAGTGAGACCTGAACCG	CCAACCCAAACCCAAGAAACGG	(AG)15	Wang et al. (2004)1
	CEDG201	azuki bean	genomic SSR	142	138	10	CGGGTAGACAAAGAGATACACG	CTAGCAGAAACAGGAGATCCTC	(AG)10	Wang et al. (2004)1
	CEDG202	azuki bean	genomic SSR	146	146	-	GTTGGAGTCTTGCACTGCG	CTATCCCCTGATCAGGAGC	(AG)12	Wang et al. (2004)1
	CEDG203	azuki bean	genomic SSR	231	231	-	GACTGAACCTATGCGGTCCAAC	CAACGTGTTAGCCTTCTTGCCTC	(AG)11	Wang et al. (2004)1
	CEDG204	azuki bean	genomic SSR	151	151	-	CCTTGGTTGGAGCAGCAGC	CACAGACACCCTCGCGATG	(AG)15	Wang et al. (2004)1
	CEDG205	azuki bean	genomic SSR	225	225	-	GTGGTGGTGACAGTAGCAGTAG	CAGCCACCACAAGACAACCTC	(AG)4AT(AG)11	Wang et al. (2004)1
	CEDG207	azuki bean	genomic SSR	232	228	2	GAAAGATCACTGCATGCACACTG	CACGCCTTCTTCAAACTTCAAAGG	(AG)18	Wang et al. (2004)1
	CEDG208	azuki bean	genomic SSR	169	169	-	CTCAGTCGCAGATCACATTGACAG	CCATGTCGGAACCCAACCAATGAG	(AG)9(AAAG)2(AG)2	Wang et al. (2004)1
	CEDG209	azuki bean	genomic SSR	-	-	-	CAGTGAAATCGTTAGGAGTTCAG	CTTCATACTCCTTGGCTATTCTG	(AG)9	Wang et al. (2004)1
	CEDG210	azuki bean	genomic SSR	-	-	-	GAACCCACTTCTGAAGTTC	GAACAACCTCTGCAGTAG	(AG)10	Wang et al. (2004)1
	CEDG211	azuki bean	genomic SSR	202	202	-	GAGTGTGCATATGTGAGAG	CAAGTCTAATCTCTGACTCC	(AG)8AAAA(AG)4	Wang et al. (2004)1
	CEDG212	azuki bean	genomic SSR	544	544	-	CTTAAGGCAGATTACCTG	GCAACGCAAGTTATCAAG	(AG)22	Wang et al. (2004)1
	CEDG214	azuki bean	genomic SSR	172	162	9	CACTCACTGCAAAGAGCAAC	CTACCTATCTGAGGGACAC	(AG)4AA(AG)31	Wang et al. (2004)1
	CEDG215	azuki bean	genomic SSR	174	174	-	CGTACTGAGATTGAGGTC	CACCATGTGTTCCTCAAG	(AG)16	Wang et al. (2004)1
	CEDG216	azuki bean	genomic SSR	141	141	-	CAGGAAACTTAGCAAGGTGAGG	CTCAGCCCTTCTGAAGTTGG	(AG)15	Wang et al. (2004)1
	CEDG217	azuki bean	genomic SSR	134	134	-	CGACGCAGCTGAATCAAATTCACG	CAAGCAACGGAGTAGAATGGAACG	(AG)9	Wang et al. (2004)1
	CEDG218	azuki bean	genomic SSR	170	170	-	CTTGCACCACAGTCTCCTTG	CCAATTGGAGGGTTGGTGTC	(AG)11	Wang et al. (2004)1
	CEDG220	azuki bean	genomic SSR	130	130	-	GGTATTGAAGTCACATGGTCC	GGTTGTTATCTTTGTGCACTCC	(AG)10	Wang et al. (2004)1
	CEDG221	azuki bean	genomic SSR	-	-	-	CACCCATCACATTTCCTC	CACTACACACACACGTAG	(AG)19	Wang et al. (2004)1
	CEDG222	azuki bean	genomic SSR	151	149	10	CCATGCACATGCCTGAGGAC	GAGGAGAACTGGGTGACAGC	(AG)9GG(AG)8	Wang et al. (2004)1
	CEDG223	azuki bean	genomic SSR	150	150	-	GCAGAGCAGAGATTTGAG	GGTATAGTCCCTTAAGTGTC	(AG)10	Wang et al. (2004)1
	CEDG224	azuki bean	genomic SSR	144	144	-	GGTATGTGAAGTGAATGGCTG	CTCACTCTCACTCCAGTAC	(AG)9	Wang et al. (2004)1
	CEDG225	azuki bean	genomic SSR	158	158	-	GAGGAAGTGTTGCAGCACC	GTAGACTCTGCAGAGGGATG	(AG)8TG(AG)3(TG)2(AG)4	Wang et al. (2004)1
	CEDG226	azuki bean	genomic SSR	140	140	-	GAGAACATTGCATCTCTTAG	GGTGATAGGAACAAGTCAAG	(AT)6···(AG)8	Wang et al. (2004)1
	CEDG228	azuki bean	genomic SSR	178	176	9	GTCGTTTCCGGAAACTGTTC	GATCCGAACCTCTTTCTGC	(AG)17	Wang et al. (2004)1
	CEDG229	azuki bean	genomic SSR	185	185	-	CTCTGTTTGCACTGTTCTACC	CATGGTTTGAGGTAGCTGC	(AG)9	Wang et al. (2004)1
	CEDG230	azuki bean	genomic SSR	56	56	-	CTAAGAAGTGGAAAATGTTGG	CCACTCATCACATAACTTCC	(AG)10	Wang et al. (2004)1
	CEDG231	azuki bean	genomic SSR	-	126	-	GAGGCTACGAGAAGAGAGTG	CGCCAACCATCATCACAGTG	(AG)11	Wang et al. (2004)1
	CEDG232	azuki bean	genomic SSR	141	141	-	GATGACCAAGGTAACGTG	GGACAGATCCAAAACGTG	(AG)16	Wang et al. (2004)1
	CEDG234	azuki bean	genomic SSR	-	-	-	GCTGTCCTAAATGCTCGCAAC	GCTGCAGGAATTCGATACACC	(AT)22(AG)19	Wang et al. (2004)1
	CEDG236	azuki bean	genomic SSR	200	200	-	CGATGATGAGTCTTTGGAATTGGG	CTTGGACGGACAGAGTTTGGATTC	(AG)10	Wang et al. (2004)1
	CEDG237	azuki bean	genomic SSR	90	90	-	GGATGTACTCACTCTCCACTC	CAAAAGCACATTGGCGCTTGTG	(AG)11	Wang et al. (2004)1
	CEDG238	azuki bean	genomic SSR	-	-	-	GCAGAATTTGACTGCTAGAAAGC	CCATACATTTGTTGCACGCATG	(AG)12	Wang et al. (2004)1
	CEDG240	azuki bean	genomic SSR	-	-	-	GCTTCATTGTCATATTGCTTACTG	CGTTTAGACTATTACTCTCGTAG	(AG)5	Wang et al. (2004)1
	CEDG241	azuki bean	genomic SSR	245	245	-	GTGACCCACTAAATTTCGTG	GAACTGGCTATTCCGGTAAC	(AG)5	Wang et al. (2004)1
	CEDG242	azuki bean	genomic SSR	101	101	-	GAAAATGGTGAGATATGGAC	GCTTAACTAATACTAACACCG	(AG)12	Wang et al. (2004)1
	CEDG243	azuki bean	genomic SSR	-	-	-	GACAACTCATCCATTCTTGAG	CCTATGGATAGTGATACAGC	(AG)12	Wang et al. (2004)1
	CEDG244	azuki bean	genomic SSR	134	120	-	GCATATAAGAAAAGCTTATCC	CTCTTGGAGTGATTTGATC	(AC)12A(AG)12	Wang et al. (2004)1
	CEDG245	azuki bean	genomic SSR	145	145	-	GATAGAGCTTAAACCCTC	CTTTTGATGACAAATGCCC	(AC)10(AT)9(AG)14	Wang et al. (2004)1
	CEDG247	azuki bean	genomic SSR	-	-	-	GTAGACACTGATCATCACC	GACCATCATCGATACGATTC	(AG)16	Wang et al. (2004)1
	CEDG248	azuki bean	genomic SSR	93	93	-	CAGAACACAAAAGGGTTCTCG	GTGGATTCACTCGCTTCC	(AG)17	Wang et al. (2004)1
	CEDG249	azuki bean	genomic SSR	-	-	-	GGTCAAAATCGCAAGAGGGAG	CATCGCCAACGAAGTTGGTC	(AG)17	Wang et al. (2004)1
	CEDG250	azuki bean	genomic SSR	125	125	-	GCATCTTCCAAAGCTAAGCG	CATCTTTGCCAGCTCCAATC	(AG)22	Wang et al. (2004)1
	CEDG251	azuki bean	genomic SSR	-	-	-	ATATCTCAAAACCCTTCCTG	CCTCAATAACAATGATACGAC	(AG)12	Wang et al. (2004)1
	CEDG252	azuki bean	genomic SSR	-	-	-	CCATTTCTAAGCACTTAATCAACC	GGTAGAGACTTATTGTCTCG	(AG)9	Wang et al. (2004)1
	CEDG253	azuki bean	genomic SSR	-	-	-	CACTTCCATGATGACTCACC	CACCCTTCTTTATCCTCTTCG	(AG)30	Wang et al. (2004)1
	CEDG254	azuki bean	genomic SSR	110	110	-	CGATGTCTCTTGCTTCAAGG	GTGAAGGACTAGCCAAGTTTG	(AT)13(AG)11	Wang et al. (2004)1
	CEDG255	azuki bean	genomic SSR	-	-	-	GGTAAGTAATTCCTCATGC	CCCTTCAATATCTTCACTC	(AG)18	Wang et al. (2004)1
	CEDG256	azuki bean	genomic SSR	227	227	-	CCTTCACTATGTCCACATCC	GTTGTTGGTCGGTTCAGAG	(AG)12	Wang et al. (2004)1
	CEDG257	azuki bean	genomic SSR	96	96	-	GACTACTCTCAAGACCAAAG	GATGGTTGTAGATAACACTCC	(AG)12	Wang et al. (2004)1
	CEDG258	azuki bean	genomic SSR	-	-	-	CAATGCTTCATACATGCTAC	CACGTTCTAAACGTTCTAAG	(AT)30(AG)11	Wang et al. (2004)1
	CEDG259	azuki bean	genomic SSR	119	119	-	GATCATCGGACAGAGCTTCC	CACTCTCTGCGAACTCAATCG	(AG)11	Wang et al. (2004)1
	CEDG260	azuki bean	genomic SSR	132	132	-	GCAGAGGATGAAAGAGTGC	CAGAGATCTCACCTTCGAC	(AT)7···(AG)10	Wang et al. (2004)1
	CEDG261	azuki bean	genomic SSR	193	193	-	GGTCCCAAAATCACCCAG	GGTTCATTTGGAGCACTGAG	(AG)17	Wang et al. (2004)1
	CEDG262	azuki bean	genomic SSR	439	439	-	GATGAGCCGAATTCGGTGTC	CTGCTTCACCTCGTGACC	(AG)16	Wang et al. (2004)1
	CEDG263	azuki bean	genomic SSR	88	88	-	GATTGGGAATCTGCTGTTG	GTGATCCACACACAGTAC	(AG)6AT(AG)7	Wang et al. (2004)1
	CEDG264	azuki bean	genomic SSR	184	180	5	GATTCCCTTCCTAGCTATGG	CTGCTGGACATGAAGATTCAG	(AG)10AT(AG)16	Wang et al. (2004)1
	CEDG265	azuki bean	genomic SSR	191	191	-	GTAAAACAAACACACAGGAC	GCTCTCAACGAGAATGAAC	(AG)4AA(AG)9AA(AG)3	Wang et al. (2004)1
	CEDG267	azuki bean	genomic SSR	208	208	-	GTGCTTGCATATGCAATGTCC	GGCATCTAAGAAATCCATGTCG	(AG)10	Wang et al. (2004)1
	CEDG268	azuki bean	genomic SSR	136	136	-	CATCTCCCTGAAACTTGTG	GCTATCAATCGAGTGCAG	(AG)16	Wang et al. (2004)1
	CEDG269	azuki bean	genomic SSR	157	157	-	CTGTTACGGCACCTGGAAAG	GCAGAGACACACCTTAACCTTG	(AG)14	Wang et al. (2004)1
	CEDG270	azuki bean	genomic SSR	205	205	-	GTGCGTCACTAGTCCATTGC	GCAGAAGATTGAATCCTGGACC	(AG)9	Wang et al. (2004)1
	CEDG271	azuki bean	genomic SSR	201	221	8	GCACTAAAGTTAGACGTGGTTC	CACTCCCACTGCCAAACAAGG	(AT)12(AG)13AA(AG)7	Wang et al. (2004)1
	CEDG272	azuki bean	genomic SSR	89	89	-	GCATAGGTTGAGATGATGAAAGC	CAACCATCACCACCAAACTCATG	(AG)10	Wang et al. (2004)1
	CEDG273	azuki bean	genomic SSR	-	-	-	GTTTAGCTTCTTCTGCTG	CCAAACTGTCAATATCTGC	(AG)18	Wang et al. (2004)1
	CEDG274	azuki bean	genomic SSR	287	287	-	CAACTAACATGTGCCGATC	GCTCAAGCAATGTGAAGTAG	(AT)12(AG)15	Wang et al. (2004)1
	CEDG275	azuki bean	genomic SSR	245	245	-	CACACTTCAAGGAACCTCAAG	GTAGGCAACCTCCATTGAAC	(AG)14	Wang et al. (2004)1
	CEDG277	azuki bean	genomic SSR	-	-	-	CTGAAAGGTATCATCGGTCG	GAGGCCAAAATCCGGTAC	(AT)16(AG)12	Wang et al. (2004)1
	CEDG279	azuki bean	genomic SSR	177	177	-	GGTCTTTCTAAGCGGAGCAC	CTGCCTCTCTACACAAGTGG	(AG)5(AAAG)2(AG)3G(AG)9	Wang et al. (2004)1
	CEDG280	azuki bean	genomic SSR	137	137	-	CAGATTCAGTCTGCTTTTGAG	CCACTGCATTCATTCATGAG	(AG)14	Wang et al. (2004)1
	CEDG281	azuki bean	genomic SSR	206	206	-	GTGCTGTTATTGGTGTTGGTGC	CGAGGTACGTACGAGTAACG	(AG)14	Wang et al. (2004)1
	CEDG282	azuki bean	genomic SSR	288	288	-	CAGCAACAAGACATGGAGTG	GGTGACCACTTAGACAGAC	(AT)16(AC)5(AG)10	Wang et al. (2004)1
	CEDG283	azuki bean	genomic SSR	121	121	-	CATGCGTGACTTTTTGGATG	CGGCTTCCTAAATTCACTG	(AT)23(AG)17	Wang et al. (2004)1
	CEDG284	azuki bean	genomic SSR	-	-	-	GGTGCTAACGTTGGAAACTGAG	CACTCCATTCTGAGGATCAATCC	(AT)19(AG)21A(AG)5	Wang et al. (2004)1
	CEDG285	azuki bean	genomic SSR	538	538	-	CGTTATGAGAGGGACCACAG	GCATGCAATGCGATGCAACC	(AG)10	Wang et al. (2004)1
	CEDG286	azuki bean	genomic SSR	158	158	-	CGAGCAGAACACTGATCATG	CCTCTTAGAGGTCATTGCTC	(AG)23	Wang et al. (2004)1
	CEDG287	azuki bean	genomic SSR	140	140	-	CCTTATACTAAAGATGTTGGTGG	GTGATACGCATATAGGTTCAC	(AG)14	Wang et al. (2004)1
	CEDG288	azuki bean	genomic SSR	222	254	9	CTTTCTGAAACGGAACAATCC	CAACGATTGGTACAAGACTG	(AT)7(AG)19	Wang et al. (2004)1
	CEDG289	azuki bean	genomic SSR	-	-	-	GTTCTCGCGAACTTAGTG	GGATAGCTAGGGTTTCAG	(AG)3G(AG)9	Wang et al. (2004)1
	CEDG290	azuki bean	genomic SSR	211	211	-	GACACTCTTTGTTTGTAGG	CAGTGATCACTCTGGTTG	(AG)11	Wang et al. (2004)1
	CEDG291	azuki bean	genomic SSR	397	397	-	CCTCAAGTGGGGTTACC	GGTCAACCTCATTCTCCC	(AG)16	Wang et al. (2004)1
	CEDG292	azuki bean	genomic SSR	-	-	-	GTGGTTTTGTTGACCTTGTC	GTAATGCTCCAATGGCTTC	(AG)6	Wang et al. (2004)1
	CEDG293	azuki bean	genomic SSR	102	102	-	GGATGGTAATGGTAGTTGCTG	CTTCTAGAAACCCGTCACTG	(AG)18	Wang et al. (2004)1
	CEDG294	azuki bean	genomic SSR	204	174	3	CACCTTCTTAATCTCTTCACC	GGGTTTCTCTTAATTCATTGAGTC	(AT)27(AG)15	Wang et al. (2004)1
	CEDG295	azuki bean	genomic SSR	165	165	-	CAAAGGTTAGATCCAACATCG	GGTTAGTCATCAACAACTCC	(TG)10(AG)11(TA)4	Wang et al. (2004)1
	CEDG296	azuki bean	genomic SSR	210	218	3	CCAGCAGAGAAGCCAGATTAC	GCAGTGCAAGCATGGATGAAG	(AG)18	Wang et al. (2004)1
	CEDG297	azuki bean	genomic SSR	114	114	-	GAACGCCATGGCACGAATGG	CGTTGTCGAACTTGTCGTACG	(AG)13	Wang et al. (2004)1
	CEDG298	azuki bean	genomic SSR	175	173	10	CAGTTCCTAGTTGCATGTG	CTTGGGCTGAATGTTACC	(AG)11	Wang et al. (2004)1
	CEDG299	azuki bean	genomic SSR	-	-	-	GGTCCTCCAGCTTCAAAGC	CTCATTGCCAAGGATGTCTAGC	(AG)10	Wang et al. (2004)1
	CEDG300	azuki bean	genomic SSR	155	155	-	GTGTCGGAAATGTCAGGAGG	CGACAAACCCAAACCCTAGC	(AG)4···(AAG)4···(AAG)4	Wang et al. (2004)1
	CEDG301	azuki bean	genomic SSR	121	121	-	CCAGAGTAACTTAGTAGTCG	GTACACCTCTTAACCAATCAC	(AG)12	Wang et al. (2004)1
	CEDG302	azuki bean	genomic SSR	-	-	-	GCATTGATGGAAGTAGTCAGTCG	CACCCTCTACATCACCGGTTG	(AG)14	Wang et al. (2004)1
	CEDG304	azuki bean	genomic SSR	80	80	-	ACCACTTCATAATCCCTGAG	GTTGCATGCTATATTTTGGTTCAC	(AG)9	Wang et al. (2004)1
	CEDG305	azuki bean	genomic SSR	93	93	-	GCAGCTTCACATGCATAGTAC	GAACTTAACTTGGGTTGTCTGC	(AG)22	Wang et al. (2004)1
	CEDC002	azuki bean	genomic SSR	-	-	-	GTTGGGTGTAACTGATATTC	TAGGGTAAAATGTGTCATGC	(AC)8(AT)11	Wang et al. (2004)1
	CEDC003	azuki bean	genomic SSR	-	-	-	TTGCCAGAAAAGAAAGGAGC	CAAGAAGTTTGCATTGCATC	(AC)8(AT)19	Wang et al. (2004)1
	CEDC007	azuki bean	genomic SSR	139	139	-	GGAACCTTCCAAGACTTCAG	GGAAGCATGGTGAAATACGC	(AC)12	Wang et al. (2004)1
	CEDC008	azuki bean	genomic SSR	99	99	-	GGAATTAGAGATGATTGGAC	CACCACTTCATTATGTATGG	(AT)3(AC)15	Wang et al. (2004)1
	CEDC009	azuki bean	genomic SSR	-	-	-	CAGCTATACATATTGTAAAC	GTTGTCAATGTACCAGTTTG	(AC)12(AT)16	Wang et al. (2004)1
	CEDC010	azuki bean	genomic SSR	-	-	-	GTCAAATGAGATTCTTTAGG	AAAATGCTAATGGTGGATTC	(AC)4AT(AC)5(AT)8	Wang et al. (2004)1
	CEDC011	azuki bean	genomic SSR	69	69	-	GTCCGACTTTATGTGTGGAG	TTTCTAGTTCCAGCCCCGAC	(AC)9(AT)8ACGCAC(AT)7(AC)4	Wang et al. (2004)1
	CEDC012	azuki bean	genomic SSR	-	-	-	TTTAAGCAGAGACAGTTGAC	CGCCATTGTTGATATTAAGC	(AC)9(AT)17	Wang et al. (2004)1
	CEDC013	azuki bean	genomic SSR	-	-	-	AAGGCCTAATTACAGTGGAC	TGTTATTGCTAACACGAGCC	(AC)12	Wang et al. (2004)1
	CEDC014	azuki bean	genomic SSR	103	103	-	TCCATTTCCGTGTCCATCTG	TGTTATGAAGCGCCAACG	(AC)13(AT)17	Wang et al. (2004)1
	CEDC015	azuki bean	genomic SSR	-	-	-	CATTTCGCTTACTTAAGCTC	CACACTCATTTATTCTCACC	(AC)7A(AC)2	Wang et al. (2004)1
	CEDC016	azuki bean	genomic SSR	112	112	-	ACTCTTGTCAATTGTCCAGG	TAACTTGTCACTGGAAAGGC	(AT)5(AC)9	Wang et al. (2004)1
	CEDC018	azuki bean	genomic SSR	-	-	-	TTACAAACAGAAATGTTGTG	GGTTTTTTACTTTGTACTGC	(AC)11	Wang et al. (2004)1
	CEDC024	azuki bean	genomic SSR	323	323	-	CACACTCATTTATTCTCACC	CTTTACTCTCAACATTTCGC	(AC)8	Wang et al. (2004)1
	CEDC025	azuki bean	genomic SSR	583	583	-	CACTCACACAAACAAACGCG	CTGTAATGAGAAGGGTGAG	(AC)11(AT)14···(TG)2TA(TG)5	Wang et al. (2004)1
	CEDC026	azuki bean	genomic SSR	253	253	-	CAACTCACTCTGGTTGGAAC	GGAGCGGTTCTCTTCAAGTTGG	(AC)6	Wang et al. (2004)1
	CEDC027	azuki bean	genomic SSR	138	138	-	ACTGGATGAGGGTTTAGTGCG	CTGTCTTGTCTTGTGGGTTCGTTC	(AC)8	Wang et al. (2004)1
	CEDC028	azuki bean	genomic SSR	-	-	-	TTGATTTTCCTCATTCGCAC	CAACCCAAGTTATCGAAATC	(AC)10	Wang et al. (2004)1
	CEDC029	azuki bean	genomic SSR	-	-	-	TTCCATAGGTACCAGAACTTGG	TATGCCACTGATTAGCCACG	(AC)10	Wang et al. (2004)1
	CEDC030	azuki bean	genomic SSR	399	399	-	GGCTACTAGGTGCCTTGGGAAC	CAAAGTTCAATCCCTTGGATAATCAAC	(AC)10AT(AC)8(AT)37	Wang et al. (2004)1
	CEDC031	azuki bean	genomic SSR	361	361	-	GGGAATAAATAAACCTTTCC	TCTCAAATCACATTGCCAC	(AC)9	Wang et al. (2004)1
	CEDC032	azuki bean	genomic SSR	272	272	-	CAACCAACGTACCAACAATATCAG	GATTTCCTTTCACGTGATAGAAAG	(AC)9	Wang et al. (2004)1
	CEDC033	azuki bean	genomic SSR	234	234	-	GGTTGGTAGTGTCTTTGCTGAGG	CCTTGCTTTAAGCTCAGAACTCG	(AC)9	Wang et al. (2004)1
	CEDC035	azuki bean	genomic SSR	214	214	-	GCTAAAGCGTAGGTACAGTC	ACTGGTGGAACCAACATAG	(AC)9	Wang et al. (2004)1
	CEDC036	azuki bean	genomic SSR	131	135	5	GAAAAAGTAATCAAAGCTGGG	CTTTACTAACTCCAACTCCTAACTC	(AC)8	Wang et al. (2004)1
	CEDC037	azuki bean	genomic SSR	88	88	-	CAGAAATCTGCGCAAACG	CTTCTTCACCACGTTTGG	(AC)10	Wang et al. (2004)1
	CEDC038	azuki bean	genomic SSR	-	-	-	CTTGTAAGATACAAATTTAATCTAC	TCAACAATCTCAATAAAACC	(AC)4GC(AC)3GC(AC)4	Wang et al. (2004)1
	CEDC039	azuki bean	genomic SSR	-	-	-	CTATCGAAGTAATACATTCAAAGC	GATCTATGCATGGATCTAGCATC	(AC)3GC(AC)4CC(AC)4	Wang et al. (2004)1
	CEDC044	azuki bean	genomic SSR	114	114	-	GGGTGACGTACAAACCAAACAC	AACGAAGAGTGGGAGGAAAG	(AC)8	Wang et al. (2004)1
	CEDC046	azuki bean	genomic SSR	340	340	-	CCTTCTAAAGGTGTAACTTCTC	GAATGATTCGATTGGAGC	(AC)8	Wang et al. (2004)1
	CEDC050	azuki bean	genomic SSR	149	149	-	TCCCACTTCTCCATTACCTCCAC	GAGATTATCTTCTGGGCAGCAAGG	(AC)8	Wang et al. (2004)1
	CEDC051	azuki bean	genomic SSR	74	74	-	ATGGGGGAGTTTGTTGGGAC	GCCCAAGCGACATATCTACCAG	(AC)6	Wang et al. (2004)1
	CEDC053	azuki bean	genomic SSR	-	-	-	GTTCTTGATAATTTGCTGC	ATGTATCCAGAATAGGGAAG	(AC)7	Wang et al. (2004)1
	CEDC055	azuki bean	genomic SSR	180	180	-	CAAACACTTTTGTAACTCCC	GCTTCTAACCTTGATCCTTC	(AC)8	Wang et al. (2004)1
	CEDC056	azuki bean	genomic SSR	97	97	-	GAAACTTGTATATAAATATTCTGC	GAAGAAACATAGTTTCCACC	(AC)8(AT)8	Wang et al. (2004)1
	CEDC057	azuki bean	genomic SSR	-	-	-	CACATACCCACACCAGCAC	CTCTATGTTTCGAACCTTCC	(AC)3CC(AC)4···(CCCACA)3···(AC)4···(AC)4	Wang et al. (2004)1
	CEDC058	azuki bean	genomic SSR	-	-	-	GCATCCAAACATACACAAACAC	GCTAAGTTAAAGTCTATCCTAACG	(AC)11	Wang et al. (2004)1
	CEDC063	azuki bean	genomic SSR	157	157	-	GTGTCGATGTTGTCACGTGC	GATTCGAAAGAGCGAGTGCG	(AC)4	Wang et al. (2004)1
	CEDA2AG001	azuki bean	genomic SSR	117	117	-	GTAGTGTAGCATATGATAGC	GATACTTATCACTTTGGTCC	(AG)4(AAAGAG)5···(AAG)4	Wang et al. (2004)1
	CEDAAG001	azuki bean	genomic SSR	224	224	-	CCCCATTTCCTCATTCGGAC	GCGTGAATATCCAATCACACGG	(CT)12G(AAG)10	Wang et al. (2004)1
	CEDAAG002	azuki bean	genomic SSR	149	149	-	GCAGCAACGCACAGTTTCATGG	GCAAAACTTTTCACCGGTACGACC	(AAG)16	Wang et al. (2004)1
	CEDAAG003	azuki bean	genomic SSR	127	127	-	CGATGAAGGGACACGTGGAC	GAGCGAGCGTGTACAACGTG	(AAG)2···(AAG)3	Wang et al. (2004)1
	CEDAAG004	azuki bean	genomic SSR	290	290	-	GGAGGAGAAGTCTCGGACC	GAGCGTTTTGCACAGTGTTCAC	(AAG)11···(AAG)6	Wang et al. (2004)1
	CEDAAG005	azuki bean	genomic SSR	123	123	-	GAGCATGACTCATCATACAC	CTGAAACAGATTTCTAGAACAC	(AAG)4	Wang et al. (2004)1
	CEDAAG007	azuki bean	genomic SSR	-	-	-	GTCAGAAAAGGGATGTCCTC	CAACTTCGGTAACTGACCG	(AAG)3(AAT)2T(TC)4	Wang et al. (2004)1
	CEDAAT001	azuki bean	genomic SSR	181	181	-	GTCACCCACAAAGACTTCAGG	CATAGGTCCACATGTGTCGAAC	(AAT)2(TAT)2(AAT)2	Wang et al. (2004)1
	CEDAAT002	azuki bean	genomic SSR	145	145	-	GAAAAAGTAAGGCTGAGGAAGG	CAAACCTCGTCATTCCACCATG	(AAT)18	Wang et al. (2004)1
	CEDCAA001	azuki bean	genomic SSR	-	-	-	GCATGAACTATGAACGTGTAG	GCTTTCTCTCGTATTAGTGG	(CAA)6···(CAA)3···(CAA)4	Wang et al. (2004)1
	CEDCCA001	azuki bean	genomic SSR	177	177	-	CTCCGTCGTGCCTCTCAC	GGTGGAGTGAGATCGCGTCC	(CCA)3	Wang et al. (2004)1
	CEDG2T3001	azuki bean	genomic SSR	120	120	-	CAGTTGCTCACGCACTCACC	GGCAGGAGGTTTGGTTGGTC	(GGTTT)3	Wang et al. (2004)1
	CEDGA4G001	azuki bean	genomic SSR	-	-	-	GGGCAAGACTTAAGGAGATC	GGTTCCACAGTCTTTGAAAG	(AAG)3A(GAA)2(AG)4	Wang et al. (2004)1
	CEDGAA002	azuki bean	genomic SSR	166	166	-	GTTCCTCTTCCTTTTGAGTAGC	CAATCTTCCCAATCCCATTGC	(GAA)6···(GAA)7	Wang et al. (2004)1
	CEDGAG001	azuki bean	genomic SSR	166	166	-	CTCATCAGGGACATCCTCCC	GATCGTGATCGATCCAACGGTC	(GAG)4	Wang et al. (2004)1
	CEDGAT001	azuki bean	genomic SSR	-	-	-	CATTATGTGTGAGGAGTGTTG	GCCTTGAACTAACTTATGGAC	(AT)4(GT)2	Wang et al. (2004)1
	CEDGAT002	azuki bean	genomic SSR	208	208	-	GAGGGTATCTAGACATATCG	CATTACGTGCGACTATCTC	(AT)5	Wang et al. (2004)1
	CEDGAT004	azuki bean	genomic SSR	155	155	-	CAGATCCTAACCTTGGAAAC	CAAGATTCGAAGCATGATCAG	(AT)5	Wang et al. (2004)1
	CEDGAT005	azuki bean	genomic SSR	220	220	-	GAGCCCGACTAGGTACTGG	GTCCACTCAGCCATCTCTCC	(AT)5(AAT)2	Wang et al. (2004)1
	CEDGAT006	azuki bean	genomic SSR	235	235	-	GCTGATCGTTTTCAGAAGCTAGG	CACTTGTGACAATGCCTTTCTGTG	(AT)3TAG(AT)3	Wang et al. (2004)1
	CEDGAT007	azuki bean	genomic SSR	-	-	-	CCAATAATGAACGAGTACCGC	CAAAAAGAGTTTCCCTCTAGTCC	(AT)8	Wang et al. (2004)1
	CEDGAT008	azuki bean	genomic SSR	143	143	-	GGATGTGAAAGACTTAACTTC	GAGGAATCTAAGTAAAACGAG	(AT)2AG(AT)2AC(AT)4	Wang et al. (2004)1
	CEDGAT009	azuki bean	genomic SSR	200	200	-	GACTTAACACGTCTGAAAG	GAAGTTAGTGCAATCCAC	(AT)5	Wang et al. (2004)1
	CEDGTG001	azuki bean	genomic SSR	131	131	-	CCTCCGAAACTGAAGGAAC	CCTCTCTTTGCTCTGCTTTC	(GTG)3	Wang et al. (2004)1
	E31M84	azuki bean	STS	-	-	-	CCATGCGGCTGATGATCAAC	CCAGGTTAGACAACCTTCC	-	Kaga et al. (2008)2
	cp00001	cowpea	genomic SSR	-	-	-	CCAGACAAAACAAAAACTCTCGGT	CGAGGATCACATACTCACACGTCTA	(TA)42	Kongjaimun et al. (2012)3
	cp00004	cowpea	genomic SSR	-	-	-	GGTAAGGGCTGCTTGCCTTTTT	GCTCTAACAGAATACATGATACGATGG	(TA)26	Kongjaimun et al. (2012)3
	cp00033	cowpea	genomic SSR	136	136	-	CATGATCAACCAAATACCTGGCAA	GACCCCCTTTCGCTAAAATTTCCT	(TA)27	Kongjaimun et al. (2012)3
	cp00037	cowpea	genomic SSR	-	-	-	TCCAGTGACATCATTTACACGTAGAC	GGGAAGAAGTGATGGAAGATCGAA	(TA)26	Kongjaimun et al. (2012)3
	cp00069	cowpea	genomic SSR	-	-	-	TAATGGTGGGTTAATCTTCGAGGC	AAATGGATCCCTACTCAATTTCTCC	(GT)3TTGTGAGAAATGTGATACAATTTAATC(CA)3TCATACAA(TA)27	Kongjaimun et al. (2012)3
	cp00080	cowpea	genomic SSR	-	157	6	GGCAACCTGCACAAAGTAATCTGA	ATCAAGGACAAAGTTCCGCCCTAT	(TC)11(TA)15	Kongjaimun et al. (2012)3
	cp00091	cowpea	genomic SSR	-	-	-	AGGAACACTCCCTTGACACCTGAC	GCTTTTGGACAGAGAAGTATGTGC	(TA)42	Kongjaimun et al. (2012)3
	cp00099	cowpea	genomic SSR	128	128	-	TGGCGGGATCACATAAGAAGAAAT	GGAGCCAAATATCTCCCTGAATTG	(AC)3AAA(TA)28TGCATATG(TA)3	Kongjaimun et al. (2012)3
	cp00106	cowpea	genomic SSR	-	-	-	TTCCCTTCTCTTTCTCGCCTAACC	CATTAAGATCAACACAGTCGAGACA	(TA)26	Kongjaimun et al. (2012)3
	cp00127	cowpea	genomic SSR	-	-	-	CGGTAGTGAGTGAGATGACAAAAGAA	CAAAACTGAGTCATGCCACCGATA	(TA)32	Kongjaimun et al. (2012)3
	cp00148	cowpea	genomic SSR	249	249	-	TAAGCAAAGACTTTCGTGGTGCAG	TTCAGATTTTCCTCGTTCTGGAGG	(TA)26	Kongjaimun et al. (2012)3
	cp00152	cowpea	genomic SSR	-	-	-	CAGTTTTGTCTCCACCAGACAGTTG	TCGGCCTTATTTAGCTCTCCTTCC	(TA)26	Kongjaimun et al. (2012)3
	cp00177	cowpea	genomic SSR	128	128	-	CCGGCGGAATAGTATGTTTGACA	CACTCTCACCCTCTTACTCTCATCCA	(TA)6CA(TA)7CA(TA)17	Kongjaimun et al. (2012)3
	cp00180	cowpea	genomic SSR	-	-	-	GGTGGTATGTCCTGCAAATATGGG	TCTTTCTTCCTTAAGCCCTCTAACCA	(TA)33	Kongjaimun et al. (2012)3
	cp00192	cowpea	genomic SSR	-	-	-	TTACAACAACCCTCCTCCCTAGCA	TTCGTGTACCATTTGAACTGTCCG	(TA)27	Kongjaimun et al. (2012)3
	cp00193	cowpea	genomic SSR	-	-	-	GATCAGTTTAAGTGGCAGTAAGGCA	TTGAAAACTATCTACTCCAAGCCCA	(TA)26	Kongjaimun et al. (2012)3
	cp00195	cowpea	genomic SSR	-	-	-	TTGACCTCAACGTGCTCTTTATTTC	GTGTCCTGCATTTGTGGTTAGCCT	(TA)32AATATAAACAAACA(TA)3	Kongjaimun et al. (2012)3
	cp00200	cowpea	genomic SSR	111	111	-	AACCATATGCTTCCCCGCTAGAAT	TGCCAATGGATCAGGTAACCTAACTT	(TAA)5CAATAACCA(TAA)22A(TAA)3	Kongjaimun et al. (2012)3
	cp00206	cowpea	genomic SSR	-	-	-	TCCGTGAAGTGCTTGCTGAAGTAG	GTGGTTGTCCACGAATATGTGTCA	(TA)29	Kongjaimun et al. (2012)3
	cp00221	cowpea	genomic SSR	298	304	8	TATACGCCGGCAAAGTGAAAGAGT	GCCAGATAGACTCCATGTTCCACC	(TA)29	Kongjaimun et al. (2012)3
	cp00226	cowpea	genomic SSR	-	-	-	ACATTTGGAGGCTCAAGTTGGAAA	GGCCTATTACTACAGTCTGGAGGG	(TA)38	Kongjaimun et al. (2012)3
	cp00228	cowpea	genomic SSR	-	-	-	GATCGATTGTTTCCGTGACCTAGC	CAACTTGGCAACTGTCATCAGCTT	(TA)27	Kongjaimun et al. (2012)3
	cp00234	cowpea	genomic SSR	106	106	-	TGGGTCTCTTTGCTGATTCAGATT	TTCCTTAAGCCTCTATTGTATGCCA	(AC)4ATA(AC)3AA(AC)3AA(AC)11AGA(TA)5A(TAA)6	Kongjaimun et al. (2012)3
	cp00277	cowpea	genomic SSR	140	140	-	AATTACAACCGCTGCCAAGGGTAT	CGTCCACAAGTGATGTGCCTTTAG	(TA)30	Kongjaimun et al. (2012)3
	cp00307	cowpea	genomic SSR	-	-	-	ACCACAGTGAACTTCTTTAGTTCCA	TCGTGAGGAGGGATGTCTTTAAAAT	(TA)33	Kongjaimun et al. (2012)3
	cp00328	cowpea	genomic SSR	-	-	-	TGATCACCTAAGAAGGAATGGACACA	GGATGACAATGAGATTCTTGAGATAGC	(TA)26TT(TA)3	Kongjaimun et al. (2012)3
	cp00337	cowpea	genomic SSR	-	-	-	GGTTTGAAAGGACAACAATTTGGG	GAGGGAGCGGTAGGTGGTGTTTAT	(TA)39	Kongjaimun et al. (2012)3
	cp00347	cowpea	genomic SSR	140	132	6	GCAAAATCGAGGATTAGGACATGC	TGTTGCTTCACTGATAGTTCTCACA	(TA)18(TG)18TAGAGG(TA)3	Kongjaimun et al. (2012)3
	cp00361	cowpea	genomic SSR	222	222	-	TAAATGCTAATACTCGCCGCCTTG	ACTGTGTCCGTTCGTCCTTTTCTC	(AG)33AA(AG)4CACACGAGGAAAGTACAGA(AG)6	Kongjaimun et al. (2012)3
	cp00363	cowpea	genomic SSR	280	280	-	GTCTTTATGGTTGGAAGTCTCACATCA	AAGCATATGCATCTCGTATGTAGGTC	(TA)30	Kongjaimun et al. (2012)3
	cp00381	cowpea	genomic SSR	243	243	-	GGCAGAGGAGCATTTACCAAACAC	CACATGTTCTGACGATAGGCCAAA	(TA)3AGGTAAAATACAAACCATGTAGCA(TA)26	Kongjaimun et al. (2012)3
	cp00416	cowpea	genomic SSR	136	136	-	CATTCGTTGTGGACTAATCATCCT	CTATTCATCCCACTACCACCCTCG	(TA)31	Kongjaimun et al. (2012)3
	cp00420	cowpea	genomic SSR	179	179	-	AGCATGACCCGATAAGGTTTTGAA	CAGCAGTGTAGCAGGTGCATCTTT	(TA)16T(AG)18	Kongjaimun et al. (2012)3
	cp00431	cowpea	genomic SSR	-	-	-	GGAGTGGAAGTTAAGTTGGCAATGA	GCATAACTGCGTGTGATTCCATTC	(TA)35	Kongjaimun et al. (2012)3
	cp00449	cowpea	genomic SSR	-	-	-	ACATGCGAGGCATGATCATACAAA	GCTTCACTACCTGAAATTCCAAGCATA	(TA)38	Kongjaimun et al. (2012)3
	cp00451	cowpea	genomic SSR	234	234	-	AGTTGGAGCAAAACCGGAGTATCA	ATATCTTTGACGCAACCCAAAACG	(TG)21(TA)5	Kongjaimun et al. (2012)3
	cp00455	cowpea	genomic SSR	-	-	-	CCCTCTGAGCAGATTCTCCTTGAT	TAACTGTAAATCCCCGGCTGAGAA	(TA)35	Kongjaimun et al. (2012)3
	cp00462	cowpea	genomic SSR	-	-	-	GTTTTTCAAACGAGTACGGAAACCA	CAGAGGAAGGTTCACTCCAACTTCA	(TA)43	Kongjaimun et al. (2012)3
	cp00464	cowpea	genomic SSR	175	175	-	ATGGTTGGTAGTTAAAGGTGGGGG	CAAAATGTCCAATCCTGATGGATG	(AC)10A(TA)24	Kongjaimun et al. (2012)3
	cp00500	cowpea	genomic SSR	207	207	-	GAACCCAGCACCTGTACTAAGCGT	TATCATGGCTCAATTGGTTGTTGG	(TA)28CCA(TA)3	Kongjaimun et al. (2012)3
	cp00623	cowpea	genomic SSR	-	-	-	TGTTTCTGGGACCATACATGTGCT	GGGTGATGCAGGAAGGTTTGTAAAT	(TA)3CATACA(TA)12TG(TA)7(TG)10	Kongjaimun et al. (2012)3
	cp00647	cowpea	genomic SSR	186	186	-	TATCCACTAAGACACGCCACAACG	GCAAATTGATTGCTTCATCCACTTC	(TA)30	Kongjaimun et al. (2012)3
	cp00653	cowpea	genomic SSR	188	188	-	GTCAAATGCCTTTTTCGTTGGTTC	AGTTGGACAGTTGATGCCATTTGA	(TA)27	Kongjaimun et al. (2012)3
	cp00654	cowpea	genomic SSR	-	-	-	TGGATCCTTTGCCTTCTACCAAAA	CTCAAATCATGGAGTAAACCAAAGTGG	(TA)39	Kongjaimun et al. (2012)3
	cp00666	cowpea	genomic SSR	220	220	-	TCACCTAAATTCGGGACCAGAAAA	AAAACAGTTTAGCCCCCTGCAAGT	(TA)25	Kongjaimun et al. (2012)3
	cp00671	cowpea	genomic SSR	-	-	-	GAGAAATGATCCACGATGGAAAGC	ATTTGGGTGGATTCGACAAGAATG	(TA)38	Kongjaimun et al. (2012)3
	cp00674	cowpea	genomic SSR	-	-	-	TCAGATTGGAAATGGCCACAACTA	GCAGCTACAATGGACACAACCAAC	(AC)7A(TA)22	Kongjaimun et al. (2012)3
	cp00680	cowpea	genomic SSR	296	294	2	CATGTGGGCGAAACTAATATTCCTG	GGTGGTTAGCATTTGCAGCTATCA	(TA)4AA(TA)3CA(TA)25	Kongjaimun et al. (2012)3
	cp00685	cowpea	genomic SSR	143	143	-	TTTTCCAGAAAATATGCTCAGGGG	GAATCACGTTATGTTTCTCATGCC	(TA)15TG(TA)9TG(TA)8TG(TA)8TG(TA)23	Kongjaimun et al. (2012)3
	cp00690	cowpea	genomic SSR	-	-	-	CCGGTGTTAGAAACTGATACTGCTTTG	TGGGGTGTTAGCCATATTTTGA	(TA)27	Kongjaimun et al. (2012)3
	cp00697	cowpea	genomic SSR	268	268	-	ACATGGTTGCATGTGCTCGATTTA	GATGCTGCCTTGGTTTAGATTTTTG	(TA)27TGAG(GT)3	Kongjaimun et al. (2012)3
	cp00737	cowpea	genomic SSR	167	167	-	GCAAGGGTGTGCAAATAAAAGTCA	ATCTGATGCAACACTCAATCTGGG	(TA)37	Kongjaimun et al. (2012)3
	cp00754	cowpea	genomic SSR	-	-	-	TCATCTTCAAACTCTAGTGCCACG	TCCTTTGGATCACACTTCCTTGTG	(TA)38	Kongjaimun et al. (2012)3
	cp00765	cowpea	genomic SSR	-	-	-	CCTTGAAAGTGGAGACTCTTCAGAAA	TCATGCGTAATAGGCAGAGGTGAG	(TA)7TGTG(TA)11C(TA)9	Kongjaimun et al. (2012)3
	cp00773	cowpea	genomic SSR	239	239	-	TGTGATGCTTTAAAAGTAGTCTGGGGA	TTTGATGCTTTTGCACCTGAACTC	(AC)4GCA(TA)25TG(TA)15	Kongjaimun et al. (2012)3
	cp00787	cowpea	genomic SSR	193	193	-	TGGCAACAAGGCTCTAGATACCAAC	TTTGGGTGTATGTATCTAGTCTAAGGG	(TG)4TA(TG)5TA(TG)7TA(TG)4(TA)27	Kongjaimun et al. (2012)3
	cp00794	cowpea	genomic SSR	-	-	-	TCGCATCCAGCAAATAAAAGGACT	AGGAATCGGAAGAATTGCAAGGTT	(TC)3ACTGTTCTTCACAAC(TA)24	Kongjaimun et al. (2012)3
	cp00800	cowpea	genomic SSR	263	263	-	AACGCTTGAGAAAACAAAAGGGGT	GCAATTGGCTTCTCCACTGACTCT	(AG)6GG(AG)15AT(AG)3CG(AG)4	Kongjaimun et al. (2012)3
	cp00801	cowpea	genomic SSR	222	221	2	GCCATTTAGTAGCTTTGGCATTCG	AATCATGGCATATCAAACCAACCC	(TA)31T(AC)3	Kongjaimun et al. (2012)3
	cp00806	cowpea	genomic SSR	-	-	-	CATTAACCAAACAACTTTCGGC	ACCCACCCCAGAACGTTAGTTGTA	(TA)3TTAACACATAACATTAAGATAT(TA)40	Kongjaimun et al. (2012)3
	cp00823	cowpea	genomic SSR	-	-	-	CGTCATTATCGTAGTCATACACTCCAA	GAAATAGTGGGTCCTATTCCTTCAC	(AT)3TATAGAACAT(TA)41	Kongjaimun et al. (2012)3
	cp00937	cowpea	genomic SSR	-	-	-	GGCTGCCAAATCAGTTGGTACAGT	ATATAGGAATCTTTGTGGCGTGGC	(TA)23GA(TA)3GATATAAAAATTGTCAAGGTCCTT(CA)3	Kongjaimun et al. (2012)3
	cp00972	cowpea	genomic SSR	140	140	-	ATTTTAAGCATTGCCACCAGAGGA	CAGGGATAAGATTGAGATTTATTGGGG	(TC)21(TA)10GGGATATGCG(GTT)3	Kongjaimun et al. (2012)3
	cp01020	cowpea	genomic SSR	-	-	-	CCAACAAGTAAATGCTCGCCAAGT	GGATGGAGTTGACCATTGAGAAAA	(TA)10TG(TA)18	Kongjaimun et al. (2012)3
	cp01037	cowpea	genomic SSR	243	243	-	CATACATCTGTTCCTCACAACATCA	AAGGACAAAGTTCATGCCGGGTTA	(TG)3TCTGTGTTCTGAAAGGTGC(TA)27	Kongjaimun et al. (2012)3
	cp01038	cowpea	genomic SSR	284	284	-	TTTTGACAGAAGAAACGTGGTGGA	GGGGTATGTCTGAAAGTTCAACGC	(AG)18GGAAAGGGAAAGTGTT(TG)7T(GA)3A(AG)3	Kongjaimun et al. (2012)3
	cp01088	cowpea	genomic SSR	157	157	-	CTTCGCCACATTGCTTTCTTCTCT	TTATTGGGGAAAGTTGGTGAATGG	(AG)3TAGC(TA)35CATAGA(TA)7TGTAGAAA(TA)4	Kongjaimun et al. (2012)3
	cp01105	cowpea	genomic SSR	110	110	-	TGCGTTGGAAGTCCCACATTTTAT	CCTCACCCTCTCACAGTGTCAAAC	(TA)24TTTAGGGGGTGGGTG(AG)3GGG(AG)3	Kongjaimun et al. (2012)3
	cp01142	cowpea	genomic SSR	-	-	-	AGCCACGAGATAGACACTTCTCCA	GCAAATCCTTTCCTACAAGCTAAAC	(TAA)33TGCAGAAAAAA(TA)3	Kongjaimun et al. (2012)3
	cp01180	cowpea	genomic SSR	499	499	-	GCTGTTGAATAACAAAAATGGCCC	GGGTGAAGAGTCCCTCTCATGTGT	(TA)34	Kongjaimun et al. (2012)3
	cp01196	cowpea	genomic SSR	215	215	-	TCTTACAGAGATGAGTTCCCAGTCCA	CTGTCCCAAGGAATATCACCCATC	(AC)3AATTGACATAACCAA(CT)3ACT(AC)30A(TA)13	Kongjaimun et al. (2012)3
	cp01225	cowpea	genomic SSR	135	135	-	TCATCAGCTCATAAGCCACTGGTA	TGAGTATTTAACCTGCGACAGGCA	(TA)4ACAACATTCATATGCAGACATG(TA)23ACAACTC(TA)3	Kongjaimun et al. (2012)3
	cp01257	cowpea	genomic SSR	-	-	-	TCTTTTCCAAATTAAGTGGGGG	ATGCATGCGTGTATGTCTCTGTGA	(TA)23CAT(AC)3ATAGATAGAAAAAGAAAAAA(TA)15TTTTTTTTTTTTAATCTA(AG)3AAAAATACAAAGGGAGAGG(TG)5	Kongjaimun et al. (2012)3
	cp01304	cowpea	genomic SSR	-	-	-	TCACCGCTTAATAAAGGCTCCTCA	GAGAATATCAAGGGTGAAACCGACA	(TC)19(TA)22T(AG)19ATCAAATTATTTTCAGATTAACTTTA(AG)3	Kongjaimun et al. (2012)3
	cp01354	cowpea	genomic SSR	213	213	-	GCAAAGTTTGGAGAAAGGAACAGA	GACCCACCAGAAATAAAAGCTCCC	(AG)19AAATTTGGAGG(GAA)7GAGTATGTA(TG)3CGTTGAGAGCGCCGACAGTGAAAGT(AG)3	Kongjaimun et al. (2012)3
	cp01357	cowpea	genomic SSR	232	232	-	CTCTTGAGTTTGATAGCCTTAGAGTTG	TCCTCGCACATGTTAGAGACAGAC	(TA)35TTTATAAA(TA)4AATAAAAAAAAGAGATTGAGCGAAC(TC)4GCGAG(CG)10TGTGCG(TG)4TCTCCC(AC)4GCGCACGCATATA(TG)8	Kongjaimun et al. (2012)3
	cp01363	cowpea	genomic SSR	-	-	-	TTGAGCAATGGATGAAACATCGTC	CTAGCGAGCAAACTCACACCCC	(TA)24TGTG(CG)3GGGGGGAGA(TA)3TTGTG(AG)7ATGGATTGTTTTTG(TA)3	Kongjaimun et al. (2012)3
	cp01396	cowpea	genomic SSR	-	-	-	CACGCCCAGATTCTTATCTTTGTTG	TGTTTCAGCTCCCCCAATTTAAGC	(TC)12(TA)8TCTCTATCTCCCAATGTTGTGT(AC)3TGATC(AG)3	Kongjaimun et al. (2012)3
	cp01428	cowpea	genomic SSR	-	-	-	ACCCCAACTCTCCTAACTCCCCTT	TCAGCAAGGTGGTCTTAAGTTACGC	(AC)3TCCCCCTGACCA(TA)11TGTATGTATG(TA)5TG(TA)6TGGATGGAT(AG)4A(TA)8T(AG)4ATGATGA(TA)8C(TA)4	Kongjaimun et al. (2012)3
	cp01469	cowpea	genomic SSR	-	-	-	TGAAATGTGGACACAAAAGAGGGA	TTAATTTTTCTCGAGAGGGCCACA	(TA)4GTTATAGA(TA)26	Kongjaimun et al. (2012)3
	cp01506	cowpea	genomic SSR	-	-	-	CCATGGCTGTTTTAGGTTTTCATCA	ACACCTCCCCTCACTTTCACTCAC	(TA)25TGTAGATAGAT(AG)3CGTGAG(GT)3T(TG)6	Kongjaimun et al. (2012)3
	cp01523	cowpea	genomic SSR	-	-	-	TTATAATCCGACTTGGCTGGAAGC	TTAGCGAGCAAAGGAAAAGTCCAG	(AC)4TCGCACAAACATTATAGA(TA)5GTATAG(TA)4AA(TA)9AATATGTGGGCTGCTTG(CG)3AGGGTGCG(TG)3	Kongjaimun et al. (2012)3
	cp01538	cowpea	genomic SSR	-	-	-	AGGACAAATTGAAACTGCTTTGCC	TCTCACTCCAGCATAAAATCAGGC	(TA)30TCATGA(CT)3	Kongjaimun et al. (2012)3
	cp01564	cowpea	genomic SSR	134	134	-	TGGTCTTCTGACCAAACGAACTTT	TGCTGATTGTATTGGTGGAAAAGG	(TA)10CA(TA)20	Kongjaimun et al. (2012)3
	cp01569	cowpea	genomic SSR	-	-	-	GATGTCATGTCTTCATTCATGGGC	GTTGGCATACACATATGGAAATGGA	(TA)28	Kongjaimun et al. (2012)3
	cp01582	cowpea	genomic SSR	144	-	2	GCAAAGAACCACAACCCTGTGATA	TGCTCAAGATGGCACTTCTCATTC	(TA)25	Kongjaimun et al. (2012)3
	cp01615	cowpea	genomic SSR	-	-	-	CATGGTAAGCCGCACTTGTTCTAA	CTCGTGGGTTCGACACTCCTACTT	(TAA)3TATACAACATTTATATTAT(TA)3TTAGGTAAAA(TA)14TTACGTACAAAACTTATAA(TA)3AAAAA(TA)3	Kongjaimun et al. (2012)3
	cp01710	cowpea	genomic SSR	-	-	-	GTACATGCACCTAATGTTGTGGCG	TGTCTTTGTGCCTTTGTCAATTGTG	(TA)29	Kongjaimun et al. (2012)3
	cp01713	cowpea	genomic SSR	108	108	-	GCTCCCACTAACCTCCATTCGTTT	CTGCTCTGCTCCTTCAAGTCACTG	(TA)3TT(TA)5CATATACA(TA)4GA(TA)3AC(TA)7CTACAGC(TA)3GCTATGGCTATGTCT(TA)3TGCATGAGATGAGAT(GA)3	Kongjaimun et al. (2012)3
	cp01758	cowpea	genomic SSR	184	184	-	GACGAACACAACTATTTTTCCTCTGC	CCCCTATTATCCCCGACCAACTTA	(TA)3TTTTATGTTACCAGT(TAA)8(TAT)10GTGATAGTTTAACTTGAAATTTT(GA)3AGGCACTATCAAAGT(TA)3	Kongjaimun et al. (2012)3
	cp01783	cowpea	genomic SSR	135	135	-	TTCGAATGTCCATGAAACAGAACAC	TTCATACGAAGGGTTGTCTCCAAA	(TA)34	Kongjaimun et al. (2012)3
	cp01784	cowpea	genomic SSR	-	-	-	CTTAGACCAGTCCAGGCTGAAAGC	ATTTGGGTCAGTTCAGAGGGTTGA	(AT)3CTAAAA(TA)23	Kongjaimun et al. (2012)3
	cp01787	cowpea	genomic SSR	-	-	-	CAAAAGCCGTTCTTAAATCTTGCG	CGGGAGTTGTATCCGGGTCTATATC	(TA)34G(AT)3	Kongjaimun et al. (2012)3
	cp01814	cowpea	genomic SSR	388	388	-	TATTTCTTCCTCCACCTCGTGCTC	TCCTCGTCGGTAACTACACATCCA	(TA)3A(TTA)3GTATTATTAATATTGTTAA(TA)3A(TAA)3TATTAT(TAA)3TTAAA(TAA)4TATTAT(TA)4ATCT(TAT)6ATA	Kongjaimun et al. (2012)3
	cp01826	cowpea	genomic SSR	-	-	-	TTCGACACTTTCAACCCAGTCAAA	CTATAAACGAAATCCCATCCGCAA	(TA)13CACA(TA)3T(AC)13	Kongjaimun et al. (2012)3
	cp01869	cowpea	genomic SSR	136	136	-	CCACCATACATGTTGATAGCATAGTTC	TCCACGCCTTGAAAGATTCGTAGT	(TA)3GTAGTAGATTTGTATGCACACGTGTT(TA)13TGGG(TG)5(TA)3TGAAGA(TA)5	Kongjaimun et al. (2012)3
	cp01877	cowpea	genomic SSR	145	145	-	CTTGGTAGAAAAATGCGTGTCGTG	TGTCATCCAAGATGAGCAACACAA	(TA)28	Kongjaimun et al. (2012)3
	cp01918	cowpea	genomic SSR	135	135	-	CCCCTAGGCTCTCCCTCATACAAG	TGCAGCTTTCTTACAGTGTGATGTG	(TA)10CATACA(TA)16AATATCTTGATCAACAAAGCTGA(AG)3AAT(GA)3	Kongjaimun et al. (2012)3
	cp01951	cowpea	genomic SSR	416	416	-	GTCCATGTCAAATATAGAAGTAGGTGC	GGTCTCGCTTGACCCTGTACACAT	(TA)30	Kongjaimun et al. (2012)3
	cp01953	cowpea	genomic SSR	142	142	-	CCAACTTAAGGGGGAGCGTTAGAT	AAATTCAGCAAAAGGAAAGGGGAG	(TA)24TCCA(TA)3	Kongjaimun et al. (2012)3
	cp01961	cowpea	genomic SSR	-	-	-	TTGATCCACCTGTTGCACAAGTCT	ATGGTGCCAAAGGAGATGGTAAAA	(TA)28	Kongjaimun et al. (2012)3
	cp01984	cowpea	genomic SSR	231	231	-	ATTTTGATGCGTTGTCTCTTGCCT	TTCCATCATTTCAAGCGGAGAAGT	(TA)29	Kongjaimun et al. (2012)3
	cp01987	cowpea	genomic SSR	-	-	-	GGATGTCAGATAAATGTGAAGACATCG	TGGATTGGTCTAAGAGCTATGATGAG	(CA)3AGAGAAGGTTCTAGAAGAAACTAGTCCA(TA)39	Kongjaimun et al. (2012)3
	cp02010	cowpea	genomic SSR	-	-	-	TGCACCAAGATTCGCGTATGATTA	CACTGACATGAGTGAAAGTGTAGAACA	(TA)36	Kongjaimun et al. (2012)3
	cp02069	cowpea	genomic SSR	-	-	-	TCACTTTATCTCATGCCTGAACCG	GATATGGAAGAAACAATCATCCTCC	(TA)15TCTG(TA)4TC(TA)4ATC(AT)3	Kongjaimun et al. (2012)3
	cp02070	cowpea	genomic SSR	-	-	-	AGTTCCCATCTCATATCTTAGTCAGG	CCGGAAACGAGTCTCTGGGTATC	(TA)8TG(TA)17	Kongjaimun et al. (2012)3
	cp02071	cowpea	genomic SSR	349	349	-	CACTCTCGTGCAGGGACATTATGA	CTGGCTCAAACAATCTCAGCACTC	(TA)32GAGTGTG(AG)3GG(AG)3A(TA)3TGTACAGATA(TG)9CG(AG)6CGAGTGTGAGTGTGCGAGCGTTTCTCT(TA)3AAAAA(AG)3	Kongjaimun et al. (2012)3
	cp02142	cowpea	genomic SSR	-	-	-	GGGCCAAAGGAGAAAAATAACTGG	CAGAAGTTCCTCCCAAAACTATAGCA	(TGT)3ACATTCA(TA)12T(AG)17	Kongjaimun et al. (2012)3
	cp02181	cowpea	genomic SSR	210	210	-	TGGTTAGATTGGAAGTCAATGCACA	TCGAACAAGGAGAATGGTGTCAGA	(TA)20GATAGA(TA)3GAGATAAAAAAAAATCGAAAATGATTC(CT)3(AG)5	Kongjaimun et al. (2012)3
	cp02271	cowpea	genomic SSR	284	282	5	GCCTCCACCCTTCTTTATCCTCTT	AGGACCTCTTCGAAGGTCCATCTC	(TC)16GCAGTA(TC)4TTGATTTCTTTACCTCTTCAACCCAA(AC)3TAATTAAATCAAAAGCTATCT(TTG)3	Kongjaimun et al. (2012)3
	cp02320	cowpea	genomic SSR	142	142	-	TGAATGCTAAGGTGACTTTGAACCA	CCTGGAATAATTGCACATTGGGAA	(TA)30	Kongjaimun et al. (2012)3
	cp02334	cowpea	genomic SSR	235	219	8	TTATATGCCCCAACTTGAGAGGGA	GGAACCAATGCAATAAAAGAGGAGA	(TA)3ATTAAGAATATCTAGATT(AC)13A(TA)15	Kongjaimun et al. (2012)3
	cp02345	cowpea	genomic SSR	-	-	-	ATGGGCATAAACCAATTCTCAACG	ATGCACTTACAAGGACACGCACAC	(AT)3GACTTTCCAATG(TA)35	Kongjaimun et al. (2012)3
	cp02383	cowpea	genomic SSR	-	-	-	AGGCTCTCAGAGTTGGAGGTGAAG	TACCCTCACCTCTTTGTCCCTCTG	(TG)3ATGTGTTTGTGT(GA)3A(AG)50	Kongjaimun et al. (2012)3
	cp02392	cowpea	genomic SSR	293	293	-	CTTGTAAGGTGAGATTTGCACCCA	CGACTTGTAAGGTGAGGTTTGCAC	(TG)6(TA)19CATAAAAAAATATAAACAAA(TA)4AAAATAGAGGATGTTTATAG(TA)3	Kongjaimun et al. (2012)3
	cp02423	cowpea	genomic SSR	-	-	-	CCAGGAGATTGACAGAAAACCTGA	AAGCCAGCAAAGTTTTGGAGTTTG	(TA)26	Kongjaimun et al. (2012)3
	cp02429	cowpea	genomic SSR	-	-	-	TCCCAGTCAATCTTAATCCGAATG	GAAGGCACCACCGCTTTTAATGTA	(TA)26	Kongjaimun et al. (2012)3
	cp02447	cowpea	genomic SSR	136	136	-	AGCACTCTGTGGTTTCTGGGAACT	GTCATACAATTGGTTCTGCTTATGG	(TA)35TC(TG)9	Kongjaimun et al. (2012)3
	cp02448	cowpea	genomic SSR	-	-	-	TCACTTTGGTTTCCTTCGTCAGAA	GAGGATCAGGATTAGCACATGTTGG	(TA)37TTATAAAGA(TA)3	Kongjaimun et al. (2012)3
	cp02468	cowpea	genomic SSR	130	130	-	CAGCAGAGCGGGACTGTACCTACT	CTAAATTGTAGCCTGCTGCCATCC	(TA)3CATACA(TA)32	Kongjaimun et al. (2012)3
	cp02470	cowpea	genomic SSR	247	247	-	TCGTCTCTTTCTCCGTCTCACTCA	AAAGCTCTCAACGAGAATGAACGC	(AC)3AAGACA(AG)4AA(AG)4G(GA)3TAGAT(AG)7AA(AG)3GCATCGGCGCG(TG)3	Kongjaimun et al. (2012)3
	cp02530	cowpea	genomic SSR	135	135	-	TGCAAAAGAAGAACACAACACATGC	TCCCCACGTAATTTAGTTACACCC	(TA)31	Kongjaimun et al. (2012)3
	cp02534	cowpea	genomic SSR	-	-	-	CATGAGTGCTGATTGGGGATACAC	ACCCGAATTTAAAAATCTGCACCC	(TA)30	Kongjaimun et al. (2012)3
	cp02556	cowpea	genomic SSR	-	-	-	CACCTGAGAAGTTATTTTTGTGGAACG	CGGGTATTCCAATTTTGATATGGTG	(TA)29	Kongjaimun et al. (2012)3
	cp02569	cowpea	genomic SSR	262	261	7	TCGGAGCGTTCCATAACGGTAATA	TCACTCCCATGACTCCGTCAATTA	(TA)28	Kongjaimun et al. (2012)3
	cp02584	cowpea	genomic SSR	-	-	-	CGCTTTGTATATGGGATGAAACACC	TCCTACTCCAAAACTTTGCCATCA	(TA)26	Kongjaimun et al. (2012)3
	cp02585	cowpea	genomic SSR	-	350	10	TGCTAGGAAACATGACCTTGACGTT	TGTTCCACGGTGATTGAATCGTTA	(TA)28	Kongjaimun et al. (2012)3
	cp02606	cowpea	genomic SSR	-	-	-	GTGGACGACATTGGACAACATTCT	CTTCTTTCTACACAAACGACTTCCA	(TA)16T(AG)12	Kongjaimun et al. (2012)3
	cp02612	cowpea	genomic SSR	153	153	-	AAGAGAACTAAAATGCCTCCACGC	GCAAGCGACAGTTTTTGAGTGGTA	(CA)3TGTG(TA)35CATA(TG)4	Kongjaimun et al. (2012)3
	cp02660	cowpea	genomic SSR	167	167	-	CTCGTATTTGATCAAGACTTGCCG	GCCTTCAATGAAAATGCAGGAATC	(TA)35	Kongjaimun et al. (2012)3
	cp02661	cowpea	genomic SSR	181	161	1	TGAGTTTGGCTACTTGAAACGCAC	GGTGAGTGACTTATGCTTGGTGCT	(TA)25T(AC)5AT(AC)5	Kongjaimun et al. (2012)3
	cp02662	cowpea	genomic SSR	220	220	-	CACTTCAGTTTCTTGCTCTCATAGGC	GCTCAAACTGCGAGACATTCAAGA	(AT)3G(TA)23TTATAGCAGTTTCAATTAATTATTGTAC(AT)3	Kongjaimun et al. (2012)3
	cp02673	cowpea	genomic SSR	182	182	-	ACCCTCGAGGTTCTTCAGTTCCTT	TCGAGATATTCAGAACCTAAACAGG	(TGA)3GTTATTCAATG(GA)3ATGTGTTAAA(TA)38	Kongjaimun et al. (2012)3
	cp02694	cowpea	genomic SSR	-	-	-	TGTTCAGTCCTACTATTCATACCTGCC	ACAGTGCAACGTGTCCATGTCTTT	(TA)30	Kongjaimun et al. (2012)3
	cp02779	cowpea	genomic SSR	-	-	-	ACAGTTCATGGTTGCTTCAAGACG	TGCACCTCCATCTATTATTCCATCA	(TA)26ATTTTAA(TG)3	Kongjaimun et al. (2012)3
	cp02873	cowpea	genomic SSR	-	-	-	AGTCCGGTGTTGACTGCTAACCAT	GGACTGGGATGGTATGTTCCTCAC	(TA)26	Kongjaimun et al. (2012)3
	cp02884	cowpea	genomic SSR	-	-	-	GGCAATCCAAGACCATTGGAATAA	TCCATCACATCATTGAACAATCGC	(TA)33	Kongjaimun et al. (2012)3
	cp02909	cowpea	genomic SSR	-	-	-	CCGTTGGAGATCTGCTTCAGTTTT	TGCAAGCCATTAGAGAATGACACA	(TA)8TTATATTATATTATATTATAT(TA)8TG(TA)4TTATATG(TA)4GA(TA)3	Kongjaimun et al. (2012)3
	cp02915	cowpea	genomic SSR	135	135	-	AGTTGGCTTGACCTGTCCATTTTC	GGACAACATGTGGGGTTGGATATT	(TA)21(TG)10TATCATTAAAAA(TTG)3	Kongjaimun et al. (2012)3
	cp02928	cowpea	genomic SSR	199	199	-	GCCAATTAGGGGAACCACTACCAT	GCTTACCTATTTCATTAAGTGGGGTTG	(TA)26	Kongjaimun et al. (2012)3
	cp02936	cowpea	genomic SSR	-	-	-	GCGGTTTGGACCTCAAGAATATGA	GACTGGTCATCCCCAAAACTGCTA	(CA)3AATACATACACAATACATGCA(TA)4CATATACA(TA)12CATATACA(TA)3T(AC)6AT(TA)3	Kongjaimun et al. (2012)3
	cp02937	cowpea	genomic SSR	149	149	-	TTGTCACATGAATTCTATGCCGTTC	AATGGCCTGACAGGAAATGAAAGA	(TA)3TGTTTGT(TA)26	Kongjaimun et al. (2012)3
	cp02951	cowpea	genomic SSR	340	342	9	AGCTCCTACCCCACACTCTGTCAC	GGTGGTGCAAGATTACGAGAATCA	(TA)30	Kongjaimun et al. (2012)3
	cp03103	cowpea	genomic SSR	-	-	-	AAGTAATGTATTCGGGAAAGCACG	AGAGTGACTTGAAACGGCTAGAAA	(TA)27	Kongjaimun et al. (2012)3
	cp03113	cowpea	genomic SSR	-	-	-	GAGTGGATCAGGTAAGCGAGTTCC	TTTTGGGATTTGAGATTGGAGACC	(AGA)3TCAAAAGACCCAATGA(TA)33	Kongjaimun et al. (2012)3
	cp03115	cowpea	genomic SSR	-	-	-	TGGAGATGCGAATGAGTTTCAAGA	TATGAGGATGTACATATCCCCGCC	(TA)26GAT(AG)4	Kongjaimun et al. (2012)3
	cp03218	cowpea	genomic SSR	-	-	-	CCCCAGAAAAATTTTATTTCCCTCC	AGGTGAAGTTTGACGAAGGTGAAG	(TA)28	Kongjaimun et al. (2012)3
	cp03344	cowpea	genomic SSR	449	449	-	GCGTCAACCTCTTCTCCCAATTTA	CCTAGCCTTGAACAAACCTACGGA	(TA)4TC(TA)5TG(TA)7TG(TA)4CATACA(TA)8TGTATG(TA)7TG(TA)9TG(TA)5TGTATG(TA)6CATGCA(TA)4	Kongjaimun et al. (2012)3
	cp03422	cowpea	genomic SSR	-	-	-	CAACTGGATTCTCAAATCTGTGGC	TTGTCTTGGAAATCCCACATTCAC	(TA)25A(AG)10	Kongjaimun et al. (2012)3
	cp03429	cowpea	genomic SSR	-	-	-	TTGCTAGATAATGGTGCATGGTGG	GTGCAGTGCCAATAAATTGTCGAG	(TA)26	Kongjaimun et al. (2012)3
	cp03433	cowpea	genomic SSR	139	139	-	ATTTTTCCGTGGAATTGAAGGAGC	CCAGCTGCCTAATCATGGAATCTA	(TA)26	Kongjaimun et al. (2012)3
	cp03436	cowpea	genomic SSR	-	-	-	GAGCACAAAACACAACCTGCAAAC	TGGTGACCTGTAAATCGAAGAGAA	(TA)26	Kongjaimun et al. (2012)3
	cp03444	cowpea	genomic SSR	-	-	-	CAGTGCGAAATTGCGGATTTAATG	CGGATTCTGTGCCATAATCTGGTT	(TA)31GTG(AG)4A(AG)7GGGG(AG)3	Kongjaimun et al. (2012)3
	cp03451	cowpea	genomic SSR	347	347	-	GCATTTTCCTTTTTCACTTGCCAC	AATGGGGCTTCAGACATTAGTGTAG	(TA)4CA(TA)24TGTA(TG)6	Kongjaimun et al. (2012)3
	cp03482	cowpea	genomic SSR	187	187	-	CTATCGTTTTGTTGGCCGAATCAT	CTGGAGCCTGAGTAGAGCTTGGAC	(TA)31	Kongjaimun et al. (2012)3
	cp03494	cowpea	genomic SSR	157	157	-	ATGTGGTGCATTAGGAGACAACCA	TTTAGGATGAAAGCATGAGGACTTC	(TA)3G(TA)25	Kongjaimun et al. (2012)3
	cp03505	cowpea	genomic SSR	135	135	-	CGTGAGAGGAGAGTGTGACTAAGGA	ATGGTGTCAGCACCCCAATTTTAT	(TA)41T(AG)3TATGAGCGTGTCAGAGTCTTTG(AT)3CTGTGTAAAGA(TA)3	Kongjaimun et al. (2012)3
	cp03506	cowpea	genomic SSR	233	233	-	TTACGCTTACGTTCCTCCCTCAAC	CACGTTAAATGTGATGTGTCACGAA	(TA)24TTCAGCG(TGT)3	Kongjaimun et al. (2012)3
	cp03521	cowpea	genomic SSR	-	-	-	TTGAAAAGGGTTTGGGTAGGTGTG	CTTTAATGGCACTTCGCAATTCCT	(TA)28	Kongjaimun et al. (2012)3
	cp03533	cowpea	genomic SSR	280	280	-	GTACCCTACCCGCCCTGTTGACAT	GAAAGGTGGTGGAGGGAAGAAAAT	(TA)40	Kongjaimun et al. (2012)3
	cp03562	cowpea	genomic SSR	109	109	-	ACATTTGCAGAAAAGCTTTGGAGG	CGCCGCTTAAATTATCACAGGTCT	(TA)27TG(TA)3TG(TA)9	Kongjaimun et al. (2012)3
	cp03655	cowpea	genomic SSR	-	-	-	GGTACTTTCACCTCTTTCTCAAATTGC	CTGCAACATTCCAGAAGTGCAAAG	(TA)36	Kongjaimun et al. (2012)3
	cp03658	cowpea	genomic SSR	414	414	-	CCCCACTGCCATCTAATCTTAAACC	TGGGATCATGAAAGTGAGAAAGGG	(TA)3ATATTATATTATCAT(TA)29GA(TA)3	Kongjaimun et al. (2012)3
	cp03673	cowpea	genomic SSR	245	245	-	GAGAGGGGGCCAATAGTGATTACC	GGCTTCTTTTACATGCTAATTCGTG	(TA)35	Kongjaimun et al. (2012)3
	cp03676	cowpea	genomic SSR	160	160	-	TCCATCTAACATGAACATGCCCTT	CATCGATACTGAAGTGTTGCCAGG	(AC)8A(TA)19	Kongjaimun et al. (2012)3
	cp03681	cowpea	genomic SSR	135	135	-	GGCCCTTGTACAAAAACTTCCTTT	TTCAAATGTCTTCCCCGAGAAACT	(AT)3CTAGTTATTTTAATTCAA(TA)3TTCTATCAACTTAATTATTTTCT(TA)24	Kongjaimun et al. (2012)3
	cp03696	cowpea	genomic SSR	-	-	-	ACCATGGTACATGTCAAGCCATAA	GACATCCCGCAAATCCTAGTCTTG	(TA)36	Kongjaimun et al. (2012)3
	cp03715	cowpea	genomic SSR	162	182	2	AGGAGCTCTTTCTTTGGATGGAGG	GTCATTATCTTGTGTTTTAGACCTGCC	(TC)10(TA)20	Kongjaimun et al. (2012)3
	cp03743	cowpea	genomic SSR	-	-	-	GAGTGTATGTTTTCCCTAAGTCATTCG	CGCATGCCGTCTAACAAAGTTCAT	(AT)3TATAA(AT)3TATATTAA(TA)22	Kongjaimun et al. (2012)3
	cp03762	cowpea	genomic SSR	-	-	-	GCAACATTCTTAACATTACTCTGCC	TTTGGTCGCAAGTTTCACTTTCTG	(TA)29	Kongjaimun et al. (2012)3
	cp03770	cowpea	genomic SSR	-	-	-	CCAAAGATAAATTCTCCTAGGCTCA	CGAAAGCCTAGCTTTTGAAAGAGGA	(TA)42	Kongjaimun et al. (2012)3
	cp03777	cowpea	genomic SSR	184	184	-	AGTTTTCATGCAATGGCTCCTTCT	AACGAAAAAGGGTTCTGTATTCACC	(TA)29TTCTTTCATTTTCATAC(AT)3	Kongjaimun et al. (2012)3
	cp03802	cowpea	genomic SSR	183	183	-	ATGTTATGAATGCACCTGCACGAT	CTGCAAGAAGCTAGTGTTGCTCCA	(TA)18TG(TA)4CATAGATTCTTCGACC(AAT)3ATTATACACCTTAGAA(TG)3	Kongjaimun et al. (2012)3
	cp03811	cowpea	genomic SSR	-	-	-	CATTTGCCGTCTTTGCCGTATATT	GTCCCTCCCGCTCCTTGTATAATC	(TA)41	Kongjaimun et al. (2012)3
	cp03825	cowpea	genomic SSR	207	207	-	CGACAGTGGCCATTTTATTGTTTG	TTCCATCTCTAAACATTGACGCCC	(TA)29	Kongjaimun et al. (2012)3
	cp03836	cowpea	genomic SSR	173	173	-	CACCATTGTCTTAAGGTTTTGGGGT	CTTTGAACCATCGGCTCTGATACC	(TA)5GAACTACAA(TC)3AAATAACCATAACC(TA)3TGTGAAA(TA)19	Kongjaimun et al. (2012)3
	cp03846	cowpea	genomic SSR	258	258	-	GATCAAACCCGATTCCACCAATAA	TAGGGGAAGAATGGGAAGAGGAAG	(AC)4AACACAACGTTGTT(AG)16GG(AG)3ATTGTGTTGTATATCTATGGCGAGTAAC(AG)5	Kongjaimun et al. (2012)3
	cp03852	cowpea	genomic SSR	231	233	9	GCCCAACACCATCTCCTAGCTTCT	AACAACCTTGTTGCGGTGTGAGTA	(TCT)4CTTTCTTTCTTTCTGTT(TC)24AT(AC)9	Kongjaimun et al. (2012)3
	cp03853	cowpea	genomic SSR	140	140	-	ATGCTCACAAACTCTGCAATCTGG	ACACCAACCATACACGGTCAACAT	(TA)3TGTAGAATA(AG)5AAGG(AG)21	Kongjaimun et al. (2012)3
	cp03855	cowpea	genomic SSR	555	555	-	GTGTCTTTGCCTCGTTCTTTGCTT	GCAACCATTTTGTACTACGCACGA	(GT)3AGTCTTTGATCTCTAAAAGCTTTAT(AC)11A(TA)20	Kongjaimun et al. (2012)3
	cp03862	cowpea	genomic SSR	241	241	-	CTCTTGCCACAATATGGAATTTGC	CAATAACAACATGCCCAACAAGAGA	(TA)29	Kongjaimun et al. (2012)3
	cp03863	cowpea	genomic SSR	283	283	-	AACCATTCAAGTGGCTGACCAAAT	CCCAAGGAAACTTGACTTTTTCCA	(TA)28	Kongjaimun et al. (2012)3
	cp03868	cowpea	genomic SSR	137	137	-	GTAAAGCTTTCAAATGCGTTTCACG	AGAGGGGAAGAGGGAAAAGAAAGG	(TA)26TCAAACATCTATTTTCTTTCTCTA(TC)3	Kongjaimun et al. (2012)3
	cp03876	cowpea	genomic SSR	126	-	7	CCCTTATGCCCTAGCTACATGCAC	CGTGTGCGTGTTTCGAATTCTTAT	(TA)28	Kongjaimun et al. (2012)3
	cp03923	cowpea	genomic SSR	-	-	-	ACCAACAAGCCAGTCCATCAACTT	TGCGTTGCGTACTACACCTTTCAC	(TA)24GT(TA)5GT(TA)3GT(TA)3	Kongjaimun et al. (2012)3
	cp03925	cowpea	genomic SSR	-	-	-	CACTGCTCGAAAAATTGAATGCCT	CACATGTAAAAGTAGGGTTGGGCA	(TA)30	Kongjaimun et al. (2012)3
	cp03967	cowpea	genomic SSR	137	152	-	TTTATCTGTGTCAGCAAAAGCTGC	TTGGATGCTACAATCACCAACACA	(AC)10A(TA)32	Kongjaimun et al. (2012)3
	cp03981	cowpea	genomic SSR	232	230	7	CAGGCCAGAACATTGTCACTTTTG	TCTTTTTCTGAGGTTGTGGCATGA	(TA)30	Kongjaimun et al. (2012)3
	cp03989	cowpea	genomic SSR	216	216	-	CAAGAAAGCCATTTTTGTTGGGTTC	CAAGTGTGAGTCAAAAAGTTCCACA	(TA)20TTTTCATATAGGGTCATGGTGATT(GA)3TTGTGATTATT(TA)8	Kongjaimun et al. (2012)3
	cp04037	cowpea	genomic SSR	272	272	-	ACACATGCTGTGCACCTTTTATGG	GTCTTGCAAGGAAAACATCATACAC	(TA)4CTTTTACTTTTA(AT)3T(TA)23	Kongjaimun et al. (2012)3
	cp04111	cowpea	genomic SSR	111	111	-	TTGGTGATTACGTGAAGGTGATGG	CCACGTCAATCTAGAAACTCTTTCCG	(TA)35	Kongjaimun et al. (2012)3
	cp04114	cowpea	genomic SSR	-	-	-	GGGTGTGAAGTTCGAAATGTTTGAC	ACCGACAAGAACATATCGGCTA	(TA)29	Kongjaimun et al. (2012)3
	cp04120	cowpea	genomic SSR	140	140	-	TATTTGCGAGGACATCTGGTTCAG	CACCCTCATGCAACCACCTTTAAT	(TA)3AAGTTTGTGTCAATCCCACGA(TA)29	Kongjaimun et al. (2012)3
	cp04129	cowpea	genomic SSR	350	350	-	ACAGGGCTCTTGATACCAGCTTGA	AACCGTGCTTGTCTCCCTAGTGTT	(TG)7TCAA(TA)39(TG)12C(GT)3	Kongjaimun et al. (2012)3
	cp04143	cowpea	genomic SSR	-	-	-	TCGTTCCCATACCTGCCAAAATAC	GGTTTATTGGATACGGCAGGAACA	(TA)33	Kongjaimun et al. (2012)3
	cp04173	cowpea	genomic SSR	109	109	-	ACTTGGCGACTCTTAATCTTGGCA	CCTTTCAGCCAAAGGTATACACGG	(AT)3TTT(TA)3GTATGCACAAAAATATT(TA)23TG(TA)5	Kongjaimun et al. (2012)3
	cp04185	cowpea	genomic SSR	-	-	-	AAAATCATCTTTGGAGTTGCCCTC	TCTGTGCGTAAAATGGATCCTTCA	(TA)3AATATTAATTTTAAGTGAACAAAA(TA)23	Kongjaimun et al. (2012)3
	cp04193	cowpea	genomic SSR	212	212	-	TGGCCTAAACTACTGCATGAAGGC	AAGAGGAAAAGGGAAGGGAATAGA	(TA)35	Kongjaimun et al. (2012)3
	cp04208	cowpea	genomic SSR	229	229	-	GACCGTGTATCAGAGAAGCTGCAA	AATCGCGAAGCTTACCTGTTGTGT	(TA)39AATTAAAATTGTACATGCACTCTTCA(TG)3	Kongjaimun et al. (2012)3
	cp04220	cowpea	genomic SSR	293	286	9	AGACGAAAGCTTGGACACGAGAAG	TCACTGTCCTTTAATGCTCACGCA	(TA)7TGTG(TA)20	Kongjaimun et al. (2012)3
	cp04232	cowpea	genomic SSR	-	-	-	CCACCCTAAAGTTAGAAAGGGGGA	ACCTCGGATAAACCAAAGCTCAAA	(TA)37	Kongjaimun et al. (2012)3
	cp04256	cowpea	genomic SSR	200	200	-	CAGTACACATGCAGTGTTTTGGCA	GACAACTGATGTAGGTGTGGGTGG	(TA)28	Kongjaimun et al. (2012)3
	cp04264	cowpea	genomic SSR	209	209	-	GCAAGAAGCAACAGGCTATCATCA	GAGGAGAGTCTGTCTCATTGCAAGTT	(TA)27	Kongjaimun et al. (2012)3
	cp04279	cowpea	genomic SSR	307	307	-	CATCTGCAATGACGACGTTTTTAAC	GGTCAAAATGAAGTACACAAAGCCA	(TA)26	Kongjaimun et al. (2012)3
	cp04311	cowpea	genomic SSR	281	281	-	CTCCAGAAGAAGCAAGCTAAGGTG	ATGTCACTGACGTCTCAAGGATGG	(TA)31	Kongjaimun et al. (2012)3
	cp04320	cowpea	genomic SSR	252	252	-	GTTTTCCAGTTTTCTGCATTCCAAC	AACCATCAGCTTTCCTTTCAGACA	(TA)16CA(TA)5CA(TA)3CAAA(TA)3	Kongjaimun et al. (2012)3
	cp04328	cowpea	genomic SSR	149	149	-	CTGGATTGTTAGATTGATTAGCGTAGG	GGGTGTTGAGCAAAGCATGAAGAG	(TA)45	Kongjaimun et al. (2012)3
	cp04371	cowpea	genomic SSR	179	179	-	TTATTGTAGTGCTGGTGCATGGAA	CGGGCCTATAGCTGTGAGACTTGT	(TA)33	Kongjaimun et al. (2012)3
	cp04463	cowpea	genomic SSR	-	-	-	TGGCATGCATTCTGCACTACTTTT	CATTGGGGCATATGAACGAATATAG	(TA)46	Kongjaimun et al. (2012)3
	cp04471	cowpea	genomic SSR	320	320	-	CAAAAGACCACAACCTTATGCGTG	TCCAGTGATTTTATGCGAGCTACA	(TA)32	Kongjaimun et al. (2012)3
	cp04478	cowpea	genomic SSR	350	350	-	ATCCGTGACAACAGTAAGTGCAGC	TTGGGTACCTAAAGCAACTGGGTC	(TA)43GA(TA)4GCTACATATGA(AT)3	Kongjaimun et al. (2012)3
	cp04479	cowpea	genomic SSR	135	135	-	GGTTCTCAAATTCAACTACAATCGGC	TCTGGATCTCTGTCTCTGTGTCTGTG	(TA)28AATATTCCATT(TA)3T(AC)3ATACA(TA)5	Kongjaimun et al. (2012)3
	cp04488	cowpea	genomic SSR	-	-	-	TGCTAGTGTTCATGCCAATCAATG	TGTGGGCATCAGCTTTTAAACTCC	(AC)3CATGATACACAAATATGATATG(TA)3GGATATGACA(TA)26	Kongjaimun et al. (2012)3
	cp04502	cowpea	genomic SSR	-	-	-	CGTGACTTCTAAGAACCTCCTTCCC	AAATGAATTTAACGCTCCTCGCTG	(TA)36	Kongjaimun et al. (2012)3
	cp04508	cowpea	genomic SSR	-	-	-	CCTACTGATTCACGAACGTGACAAAT	AAACAGAAACGGTTCGGGCTAGTT	(TA)27	Kongjaimun et al. (2012)3
	cp04516	cowpea	genomic SSR	110	110	-	AATTCGTGACATTTACGGCCTTTG	TCCCTTTACCTTGTTCAAGCATTAG	(TA)31	Kongjaimun et al. (2012)3
	cp04518	cowpea	genomic SSR	119	119	-	TCAAAATATCAGGGACTCGTGACAA	TTGACGAAACTCAAATCACGGA	(TA)32	Kongjaimun et al. (2012)3
	cp04540	cowpea	genomic SSR	257	257	-	CGGGATATTTTACGAACTCGTAGGG	CAGTCCTCAATGTACCGGTGTCAA	(TA)35	Kongjaimun et al. (2012)3
	cp04550	cowpea	genomic SSR	-	-	-	GGTATAGTTCCCTCGGCTCTTCGT	GGTGTGAAAGTCTCTGATGGGTTT	(TA)38	Kongjaimun et al. (2012)3
	cp04558	cowpea	genomic SSR	108	108	-	TTCTGGTGAGTCTTGGACAGAGGA	GGACTCATCAATTGCGCAGACATA	(TA)40GACCCATAACTCGTGCAGGTTAATCC(CA)3	Kongjaimun et al. (2012)3
	cp04561	cowpea	genomic SSR	203	203	-	TGCGTACTGTACTTGTGCCTATGT	CGCGCCGTCTTCTTAGATATTTTG	(TG)4CC(TA)23	Kongjaimun et al. (2012)3
	cp04570	cowpea	genomic SSR	184	184	-	ACAAGCATGCCTCCTCGTAACTTC	CAGAGGTCAAACCGTTTAGAAATGA	(TA)30	Kongjaimun et al. (2012)3
	cp04620	cowpea	genomic SSR	-	-	-	CGTTCCCATTATCCATTTCCCTTT	TCGTGAGCCTTTGAGCTTCTCTTT	(TA)37	Kongjaimun et al. (2012)3
	cp04674	cowpea	genomic SSR	135	135	-	GCGATTGCCGATGATATAACCAGT	CATAAATACCCGATATCCCACCGA	(TA)45TTTTGA(TTA)3	Kongjaimun et al. (2012)3
	cp04700	cowpea	genomic SSR	142	142	-	GCCCTTAGTTTAGTGCTTAGGATCTGA	TGTGCACATTTTCACAGTCTCCCT	(TA)7AA(TA)34	Kongjaimun et al. (2012)3
	cp04704	cowpea	genomic SSR	-	-	-	TGACCCTGTGAATTGTGTTATTGAGG	GGTCGAGGATTTGTTGTTCACCAT	(TA)5CA(TA)7TG(TA)15CAAA(TA)3AATATGCATAAACTTTG(TA)3	Kongjaimun et al. (2012)3
	cp04728	cowpea	genomic SSR	-	-	-	AATCTTCACCACTCATACCAAACAC	TTAGGCCATGGGCGCTTTTATATT	(AT)3TTTATCTTTTTGCAC(TA)3AATATAAA(TA)23TC(CA)3	Kongjaimun et al. (2012)3
	cp04824	cowpea	genomic SSR	217	217	-	TGGGCATTTGATAGAGGTTTAAAGG	TCCCAAAACTCTCATCATTCAGCC	(TA)33	Kongjaimun et al. (2012)3
	cp04849	cowpea	genomic SSR	168	168	-	CTTCGAATTTGTCCATCGTCGAGT	CCTTTTATTTCTCTAACACGCGCC	(TA)31	Kongjaimun et al. (2012)3
	cp04859	cowpea	genomic SSR	135	135	-	CCTTTCACGAAACTATGAATAAGGTGG	TGAGATGGCGAGATTGATTTCGTA	(TA)47	Kongjaimun et al. (2012)3
	cp04871	cowpea	genomic SSR	-	-	-	CACAGGGCTTTTGTGAGGTTTTTG	ACTAACAGGAGCACAACCCATTCA	(TA)28	Kongjaimun et al. (2012)3
	cp04879	cowpea	genomic SSR	-	-	-	TTAATCCGTGACTCGTGACTGACA	TCAAGCTAGCAGGATATTTTGTCTCAC	(TAT)3ATTTACTGATTAA(TA)26	Kongjaimun et al. (2012)3
	cp04908	cowpea	genomic SSR	143	143	-	GGACAAACGGAATCATTAACACCA	ATGACCCGTTTTGTCACCCTTAGA	(TA)31	Kongjaimun et al. (2012)3
	cp04934	cowpea	genomic SSR	200	200	-	CATGACAACATGTTTAAGGATGCC	GTTTCAACCGGCCAACCAATACT	(TA)31	Kongjaimun et al. (2012)3
	cp04937	cowpea	genomic SSR	262	262	-	CCTTTTTGCACTGACGTAGAATTAC	TCACGCTGAATCTGGCGTATAAAA	(TA)34	Kongjaimun et al. (2012)3
	cp04967	cowpea	genomic SSR	299	299	-	CAAATCCTCACCCTAACGCAAGTT	TCTGCGCTCATACACTGATGGAGT	(TA)32ACACCAAGCTTCCCAAATTC(AC)3	Kongjaimun et al. (2012)3
	cp04983	cowpea	genomic SSR	-	-	-	ATATGATTGATGGTGGTGTAGCCG	GCACTTCACTTATCGTCGCTTGTG	(TA)20CA(TA)10CA(TA)8CA(TA)7CA(TA)6C(AT)3G(TA)5TG(TA)7	Kongjaimun et al. (2012)3
	cp04986	cowpea	genomic SSR	-	-	-	CTAGCTCTTTGAAGTGCAGCCACC	TACTCTCACCTCCTCCACTTGTGC	(AT)3CTTATGATGGTAATAAGGATGATA(TAA)23TGGTATTATGATAA(TA)3	Kongjaimun et al. (2012)3
	cp04988	cowpea	genomic SSR	-	-	-	ACGGGACAAACCAATACATTTTGC	TGTTTGCAAAAGCTATCACTCACGA	(TA)29	Kongjaimun et al. (2012)3
	cp05010	cowpea	genomic SSR	263	263	-	CATGAAATGGCTGCATCTACACCT	CAACTGTTCCTGTGGCATGTTTGT	(TA)27	Kongjaimun et al. (2012)3
	cp05011	cowpea	genomic SSR	125	125	-	GGATAAAGTCAAGACGTGGTTTTCG	CACATTATCTGTCGTCGCAGGAAC	(TG)3TT(TA)29	Kongjaimun et al. (2012)3
	cp05018	cowpea	genomic SSR	-	-	-	CTCCCTCTCAAAATCTCTGCTCCA	AAAAGATGCCTGTGTTGTTGGTGA	(TA)26	Kongjaimun et al. (2012)3
	cp05031	cowpea	genomic SSR	267	267	-	CAAACACAAGCAGATAGGGTGAGC	CGCACGTGTTCTACAAGTTATGGC	(TA)4AAAAAA(AC)16A(TA)26TTCATATTCAAAA(TA)3	Kongjaimun et al. (2012)3
	cp05087	cowpea	genomic SSR	284	284	-	TTCTCCATTCCACCGTAGAGGAAC	TATGCCTCATTGAAACCTTGCTCA	(CT)3TAT(TA)28	Kongjaimun et al. (2012)3
	cp05095	cowpea	genomic SSR	205	205	-	TGCTAGTGTAGAGTCTGCCCCTCC	TGTGGCATGAAATCAGTTCAGGAT	(CTC)3CCCCA(CCT)3(TCT)3CCTCTTCCTCTT(TCT)3CTT(CCT)3TCTTCT(CCT)6(TCT)4(CCT)4C(CTT)3	Kongjaimun et al. (2012)3
	cp05096	cowpea	genomic SSR	207	209	11	AATAGTTGCACAGCCCAAAAGGAA	CAGAAAACGGAGACGACTGTCTGA	(TC)4TAAATCAA(TA)6TG(TA)16CATGCATGTAATG(TA)4	Kongjaimun et al. (2012)3
	cp05103	cowpea	genomic SSR	151	151	-	CGAGTCGAGTCGAGACTACGAAACTT	CATGTATTTGTTTGCCACGAACCA	(TA)31	Kongjaimun et al. (2012)3
	cp05125	cowpea	genomic SSR	135	135	-	CAAGATACTGTCATACAATTAGGGACG	AAAGATGGGAAGGGAGAGGAACAG	(TA)22GGTGCA(TG)3TCATTTTCCCGCCC(TC)3	Kongjaimun et al. (2012)3
	cp05133	cowpea	genomic SSR	277	277	-	TGAAGCTCGCATATGAAGAAGCAG	TTCTTGGAAGACTTGGAGTCAGGG	(TA)30G(AC)3	Kongjaimun et al. (2012)3
	cp05134	cowpea	genomic SSR	-	-	-	GGTGCACCTATGCATCCTCATGTA	GAGACGAGCACGGATCTGTTTTCTA	(GT)3CA(AT)3(TA)33TTAATAAAAGTTGA(TA)3	Kongjaimun et al. (2012)3
	cp05137	cowpea	genomic SSR	-	-	-	CCGATTGTAGATGATCCCGATTGT	TGATGATTGCTGTGGGGAAATATG	(TA)3AAAT(TA)27TC(AT)3C(AT)3	Kongjaimun et al. (2012)3
	cp05141	cowpea	genomic SSR	128	128	-	GGCTGTAAGTTATGTACCTTGCCACT	TGGGCAAAATTCAGTGTCTTCAACT	(TG)8(TA)19TGTATGTATGTATGTATGTATGT(AC)3	Kongjaimun et al. (2012)3
	cp05146	cowpea	genomic SSR	108	108	-	GAACTCATCAATTTCAAATCCGGC	TGTAGTGGACTAATTCCGCTTAATG	(TA)33TTAAGTGAATTAGC(TA)3	Kongjaimun et al. (2012)3
	cp05150	cowpea	genomic SSR	-	-	-	AATGGTGAAGGAGAAGAAACGTGC	GGCAATCTTGCTCCGCTTATGTTA	(TA)23TGAATGTGT(TG)4	Kongjaimun et al. (2012)3
	cp05187	cowpea	genomic SSR	105	105	-	AAGGAAGTGCCACCCTCATTGTAA	TGAACCCTCAGTTGTTCCTTTGTG	(TA)28	Kongjaimun et al. (2012)3
	cp05202	cowpea	genomic SSR	-	-	-	AACCTAAATCACAAGGGTGGGTGA	GATTTTCAGATTGTCTCGCCTACG	(TA)43	Kongjaimun et al. (2012)3
	cp05238	cowpea	genomic SSR	-	-	-	CGCATATAAACCTTCCACCTCCAA	CACCGGAAAACTGTGCTAGAAAGG	(TA)24AA(TA)14	Kongjaimun et al. (2012)3
	cp05247	cowpea	genomic SSR	-	-	-	TCAGAATCAAACACAAGGTTTGTCG	TATTTGATGGGATCAATAGAGGGG	(TA)32	Kongjaimun et al. (2012)3
	cp05255	cowpea	genomic SSR	457	457	-	CGAAGTTTTAGACAGAGACGAATTCCA	GAGACTCCTTTGCTGAACGTTGGT	(TA)32	Kongjaimun et al. (2012)3
	cp05271	cowpea	genomic SSR	413	413	-	TTCCCACTTCCTCGCTTTATTCAA	CGTGAATTTCTTGAGGGATTGATGT	(TA)35	Kongjaimun et al. (2012)3
	cp05294	cowpea	genomic SSR	162	162	-	TAACCTCGACTCTTTCTCCAATCG	GCGAGCTCATCATTACATTGCTCA	(TA)20TGATGAAATACCAAAGAAATGTTTGT(TA)3TG(TA)4	Kongjaimun et al. (2012)3
	cp05298	cowpea	genomic SSR	-	-	-	AAAACCACCCAATGTTACACCCAT	TCAGAGTAATGTTTCTGTTTAGGAGCG	(TA)19TC(TA)10	Kongjaimun et al. (2012)3
	cp05311	cowpea	genomic SSR	110	110	-	GACTCATTCAGATTGAACCCGTGA	GCTGTTTTAGTTAGGCTCCTTTGG	(TA)11TTATAT(TA)10TTATAA(TA)3C(AT)3GATATACTATGGATCATA(AT)3G(TA)6	Kongjaimun et al. (2012)3
	cp05325	cowpea	genomic SSR	197	-	10	GTCCAAGTGGAAGAAAGAAGGGGT	GGAGCTACCTTTTCAGTGTGGAGC	(AC)10A(TA)18	Kongjaimun et al. (2012)3
	cp05370	cowpea	genomic SSR	-	-	-	TCTCACCATGTGGAATTCCTGAAA	GCCTGTGATCCCATCCTACCATAC	(TA)21(TG)6	Kongjaimun et al. (2012)3
	cp05382	cowpea	genomic SSR	-	-	-	TTTAGGATGACACGAGCTAGCTTACA	TCCGTGTTAATGATCTGAACCATCA	(TA)8GA(TA)6GATATG(TA)10G(TA)7	Kongjaimun et al. (2012)3
	cp05388	cowpea	genomic SSR	-	-	-	CTTTCACGTGCCATGTCTACTGCT	GAGATCTTGAGTTTTTCTCCTCTATGG	(TA)29	Kongjaimun et al. (2012)3
	cp05392	cowpea	genomic SSR	226	226	-	TATACGGGCTGGGATATCCAAATG	CGCTTATTACCGTTACATTCATGACG	(TA)27	Kongjaimun et al. (2012)3
	cp05393	cowpea	genomic SSR	374	374	-	AACATTCAAAATTTAGGGGGCACG	CCCATGGTCAAGGGACATATTGTT	(CT)3GCCCCTGAAAATATCCGTG(TA)27	Kongjaimun et al. (2012)3
	cp05402	cowpea	genomic SSR	225	225	-	CTTTTTCCACTGTGCTGGAAAGGT	AGCGCATGTCAAAACTCATTAGCA	(TC)11(TA)13A(TA)9	Kongjaimun et al. (2012)3
	cp05430	cowpea	genomic SSR	-	-	-	TCCAAGATTCACTGAAAGTCAAAGGAC	TTACTCCCTTTCAAACCCATGTGC	(TA)39	Kongjaimun et al. (2012)3
	cp05440	cowpea	genomic SSR	-	-	-	GAAGTTAGGTTGAAATGGGAGCCA	TGTTCTTGCGACTCAAAGCCATTA	(TA)32T(AG)15	Kongjaimun et al. (2012)3
	cp05446	cowpea	genomic SSR	209	209	-	AGCAAACCTTCTTTCACAGCAAGC	CAATCTTCAATGACAGTGAGCCGT	(TA)42	Kongjaimun et al. (2012)3
	cp05467	cowpea	genomic SSR	154	154	-	TCCACATAGTGTTTGTGCCTTCGT	GATTCTGCCATTGAAATTGCCTTAG	(TA)25TGTATGTATATG(TA)7	Kongjaimun et al. (2012)3
	cp05498	cowpea	genomic SSR	-	-	-	TGCTATGCCTCACTAGCATCACCT	GAACACGGATAGCATGATGGTGAC	(TA)21T(AC)6AATGCAA(AT)3GC(AC)3	Kongjaimun et al. (2012)3
	cp05500	cowpea	genomic SSR	-	-	-	CCCAATCTTACACGGCCCTTTTAT	GGAACGTTTATCTAAGTAAGGGGAAGC	(AC)3ATATCACAACTCATCA(TA)23	Kongjaimun et al. (2012)3
	cp05517	cowpea	genomic SSR	-	-	-	TCTAATCCTAAAACTTGCGCGGAT	ATTCTCCCTCCGAGACCAAGTACC	(TA)5AA(TA)34	Kongjaimun et al. (2012)3
	cp05566	cowpea	genomic SSR	148	148	-	AGCATCTATGCCAGCAATCCAAAT	TCGAGGTTAGACATGTTATGAGTGC	(TA)38	Kongjaimun et al. (2012)3
	cp05586	cowpea	genomic SSR	-	-	-	GGTGCTTTTGATGTACTTTGCTTGA	GGCAGGAATTTGACAAAAGAAATGG	(AT)3GC(AC)34A(TA)26	Kongjaimun et al. (2012)3
	cp05592	cowpea	genomic SSR	-	-	-	GCTGTTTTTGTGCTTTATAACCTCGG	TAGCCAATGCTGGATCAATTAGGG	(AC)3ATAATACTCCCATAA(TA)25	Kongjaimun et al. (2012)3
	cp05599	cowpea	genomic SSR	134	134	-	CACTGAATGTTAAGCGACCAAAAAC	CTTCTTGCAGAAGCTGGTCCTTGT	(TA)41	Kongjaimun et al. (2012)3
	cp05611	cowpea	genomic SSR	233	233	-	CAATAGAGGCAAGACTTACGCCAT	GGGTTGATTTGCAAAGATGGATTTG	(TA)40(TG)10	Kongjaimun et al. (2012)3
	cp05660	cowpea	genomic SSR	172	172	-	TACTCCCAATCATTCATGAGCCAA	GGTGTTTTTCACTGCAGTCACCC	(TA)30	Kongjaimun et al. (2012)3
	cp05677	cowpea	genomic SSR	515	515	-	AACCATGGCAAAAGACAACGTGTA	ATGAACCAAGGCCCATTCTTTTCT	(TA)3TCATGATTATTCCTTCTATCACATAGCA(TA)29	Kongjaimun et al. (2012)3
	cp05679	cowpea	genomic SSR	-	-	-	CCACTCAGATCAGACCAAAATAGG	CATTCAGCGCGTCGTTTAGTTCT	(TA)28	Kongjaimun et al. (2012)3
	cp05689	cowpea	genomic SSR	-	-	-	TGGACTTATAGTGTCACGTTCAAGA	TCACCCATGCATATAAAGAGATGGA	(TA)30	Kongjaimun et al. (2012)3
	cp05718	cowpea	genomic SSR	-	-	-	GGCCTTACTCCTGGGAAAGTGAGT	TGATGTTAGTTGTGCAACCTGCAA	(TA)21TTCTTGCAGAAGTGCGAGCGCGTGCGTG(AG)3ATAGAAAAAGGTGGCATTAAGTGAA(TC)3	Kongjaimun et al. (2012)3
	cp05723	cowpea	genomic SSR	-	-	-	TCAAATTACTGTCACAGACACCCGA	CTTATTTAAGGTGTGATGGGGGCA	(TA)23GGG(TG)4AGAGTGATTTGAAAGTACAATAATTT(AG)3	Kongjaimun et al. (2012)3
	cp05762	cowpea	genomic SSR	99	99	-	GGGTTTGAAGTCCTTAGGTTGTAGGC	GAGCAAAAGCAAGTGTATTGATAGG	(TA)32	Kongjaimun et al. (2012)3
	cp05783	cowpea	genomic SSR	232	232	-	AACGCAATTACACAGTTGGGGAAC	CAAAACTCGTCAGATGCAACTTCA	(TC)12(TA)19	Kongjaimun et al. (2012)3
	cp05799	cowpea	genomic SSR	-	-	-	CAGCTCTATGCCTCACCAGATTCA	TGGTGGCAAGACATCTTGAGGTAA	(TA)3CAAA(AC)13A(TA)10T(AC)8AA(AC)3	Kongjaimun et al. (2012)3
	cp05834	cowpea	genomic SSR	-	-	-	TTTCGTGTTCCTACTCGTCCACAA	TCGGTGACGGATATGCAGTACAAT	(TA)44	Kongjaimun et al. (2012)3
	cp05914	cowpea	genomic SSR	236	214	4	AAGATCGTCTCCTCCGACTCAATG	AAGCTTCCAGTGAAGGTTAAGGCA	(TA)10TGAAGCAATATGAAAAAAAAAAAGCAA(TA)18	Kongjaimun et al. (2012)3
	cp05915	cowpea	genomic SSR	116	116	-	CCAATACTGCTGGTCCAAATGAAA	TGAAATCCAGGTCAGGATATCGAA	(TA)34	Kongjaimun et al. (2012)3
	cp05922	cowpea	genomic SSR	121	121	-	ACCTTCTTGCATGCTTCTTCCAAC	CAAGCCAAAACCTTGAACAATTCAG	(TG)3AGAAGTTCCAACA(TA)3T(TA)35TGTTCTTATT(TA)7	Kongjaimun et al. (2012)3
	cp05939	cowpea	genomic SSR	200	-	2	GGGAGCTTTAACCGTGCTTAGACA	TGTGGATCTCAAAATGTCATAACGG	(AT)3TAGTCTCCCTGTT(TA)31	Kongjaimun et al. (2012)3
	cp05941	cowpea	genomic SSR	-	-	-	AGTGGTTGCATGTCCAAATCTCAA	TCTTGGGTCAACAACTGATTTTCTG	(TC)3TTCTAAACTTTTGCTT(TA)28T(TA)3GAATGAAAAAGTCG(TA)3	Kongjaimun et al. (2012)3
	cp05970	cowpea	genomic SSR	148	148	-	CAATGTTCAACTTGGCCTCCATAA	CGTGCTCTTGGAAGTCTATTTCAG	(TA)36	Kongjaimun et al. (2012)3
	cp06038	cowpea	genomic SSR	254	254	-	ATTGGCACCTACTGTTTTGCATGA	CCAATTCGAGTCCAATGCCTTAAA	(TA)29	Kongjaimun et al. (2012)3
	cp06039	cowpea	genomic SSR	236	240	9	CGGTGAACTCGGTGTACTCTGCTA	AAAAAGTAGAAAACCAAACGCGGC	(TA)3AACGATTCTTGACTCATTGC(TC)3TGCAACTCACAACTCAGAAGCAGTG(AG)20	Kongjaimun et al. (2012)3
	cp06042	cowpea	genomic SSR	-	-	-	GGTACATTCCCCTATGTCCAACGA	GCTTGGCTGAATTTCACGTTTAGG	(TA)31TGTA(TG)3(CG)4	Kongjaimun et al. (2012)3
	cp06069	cowpea	genomic SSR	207	207	-	CTTCATTAGTTGCTTTAGCTAGTTCCC	TATGCGCATGCATTTTCTGTCTCT	(TA)24TGTTTATGTGGAAGGGACAGATGGAAAA(TA)3GAAAACTCGAAATGC(AC)3	Kongjaimun et al. (2012)3
	cp06102	cowpea	genomic SSR	-	-	-	ATAACCAATGGGATTGGATTGCG	TGGTTGTGAAAAGTCTGTGATCCCT	(AG)3GAGAATTGCAAGAAACCAATTCATGT(GA)3AATAATATACATC(TA)16GA(TA)8TTCATA(TG)3	Kongjaimun et al. (2012)3
	cp06108	cowpea	genomic SSR	210	210	-	ATTGCCCTGAAGGGCTTTACAATC	TGACGCATCCAGATACAGACACAA	(TA)31CATGCTTT(TA)4TCTGAAATAATAACTCTTGCTC(TG)3TA(TG)6	Kongjaimun et al. (2012)3
	cp06116	cowpea	genomic SSR	135	135	-	TGCGTTAAGCAAACATACAACCAAC	GAAACCAATGGAAAAGCACCAACA	(TA)27	Kongjaimun et al. (2012)3
	cp06146	cowpea	genomic SSR	-	-	-	TTATTTGCTGATATGGGGGTGTCC	TCTCACAAGAGATTCAGCTCCAGG	(TG)3TTTATGCTGGA(TA)3CA(TA)27T(AC)8	Kongjaimun et al. (2012)3
	cp06155	cowpea	genomic SSR	210	210	-	CATGGTTAGCCAACCCGTGTAAAT	TGGCACGAAAGTTGGATTACATTTC	(TA)30	Kongjaimun et al. (2012)3
	cp06157	cowpea	genomic SSR	131	131	-	TGCTTGTGATTCAAAGTTGATCGG	CATTCTTCATGGGACAATACTCGTG	(TA)40	Kongjaimun et al. (2012)3
	cp06173	cowpea	genomic SSR	-	-	-	TCCACTGAATACTCTCCGCTTTTG	GGTCCGTTCTTGCTCCTTTCTTTT	(TC)18(TA)21	Kongjaimun et al. (2012)3
	cp06178	cowpea	genomic SSR	-	-	-	TTGCACTTGCATAGCATAGCCAAA	GATATGCTACCCACAGCCAAAACC	(TA)29	Kongjaimun et al. (2012)3
	cp06180	cowpea	genomic SSR	135	135	-	GAAGTCTGAATCCAACGGGCTAAA	TGCCTTGGATTTCCTACCATAGAG	(TA)27	Kongjaimun et al. (2012)3
	cp06190	cowpea	genomic SSR	-	-	-	CGAGAAAAGGAAATACAGTGAGAAGG	ATCTCCGGGGTTGTAATCCTCAAT	(TA)30	Kongjaimun et al. (2012)3
	cp06208	cowpea	genomic SSR	-	-	-	TAAGCATATGGCCAGACCTTGTCC	CTGTCGCGAATTTTATCCACAGAT	(TA)3AGACGTTTTTGCAATTACA(TA)25	Kongjaimun et al. (2012)3
	cp06216	cowpea	genomic SSR	229	229	-	CATTATTTGTGACCACTTGTGCAAC	ATGGAGGGAAACATGCACCTTAGA	(TA)33	Kongjaimun et al. (2012)3
	cp06223	cowpea	genomic SSR	-	-	-	GAAAGCTTGAACTTTGCCGTTGTC	ACCAGCACATGTAGAAAGCCACAA	(TA)31	Kongjaimun et al. (2012)3
	cp06236	cowpea	genomic SSR	-	-	-	GTCTCTTTTGAACCCCAATTGTGAA	GAATGAAATTTTGCAGGACTTGCC	(TA)22TTTGTATGTA(TG)4	Kongjaimun et al. (2012)3
	cp06240	cowpea	genomic SSR	276	276	-	GGGTCTGCATCCATAACCAAAAAT	TGAGCCCATGTTATGACCTCAAGA	(TA)24AACTTAATAAGTAGAAAATCTAAT(TAA)3TGTGTTTTCTT(TG)7	Kongjaimun et al. (2012)3
	cp06263	cowpea	genomic SSR	-	-	-	GGGGCTATTTTAATTGGCAACA	GGAGTTTTTCTCCTAAAGAGCATTC	(TA)14TT(TA)14	Kongjaimun et al. (2012)3
	cp06274	cowpea	genomic SSR	149	149	-	CGATGTGAGACTTCCAACACATCC	AGTGAGATTTGTGTTTGTTGGGCA	(TA)39TCATGCATGAAACTAGACATTAA(TG)3	Kongjaimun et al. (2012)3
	cp06328	cowpea	genomic SSR	352	352	-	AAGAACAACCTTGTAAGCGCCAAA	TCGAGAATTGTTTCTTCGAACTGC	(TA)26	Kongjaimun et al. (2012)3
	cp06377	cowpea	genomic SSR	210	210	-	GTGTTGGAAGCAGAGGAAGGTGAT	GCAAGTTGAGAACCGGCATTAAAA	(TG)3TC(TA)30	Kongjaimun et al. (2012)3
	cp06388	cowpea	genomic SSR	121	121	-	GGTAAGGACAAGGTTTTTGTCCCC	GGAAAGAAAGAAAACACGGTGTGG	(TC)16(TA)17	Kongjaimun et al. (2012)3
	cp06397	cowpea	genomic SSR	309	323	5	GGAGCTCAGATAACAGAAGCGGTG	TTCTGTCCCACAAACAATCTTCCA	(TA)15(TG)27	Kongjaimun et al. (2012)3
	cp06398	cowpea	genomic SSR	135	135	-	TGAACTTAGTCCTGCAATAAGCATACG	TGTACACATTACAGATACTGATGCCTG	(TA)7CA(TA)3CA(TA)5CA(TA)3CA(TA)7TG(TA)3CA(TA)8TG(TA)13TGCACGTA(TG)3GTGTATGC(AT)3	Kongjaimun et al. (2012)3
	cp06421	cowpea	genomic SSR	-	-	-	TGAGCTCCCCGAGGTAACATAAAA	GCATTGGTGTCTTCTGATTTGACTG	(TA)42	Kongjaimun et al. (2012)3
	cp06427	cowpea	genomic SSR	148	148	-	TTTTGCACGTATAAAGGGGTAGCA	GTGCCAAGCTTTTCACAGGCTAAC	(TA)26	Kongjaimun et al. (2012)3
	cp06554	cowpea	genomic SSR	136	136	-	GAGAATTCGAAAGTAGCAACCGGA	TACGAGTCAAGTGCCTCTCGAATG	(TA)27	Kongjaimun et al. (2012)3
	cp07296	cowpea	genomic SSR	136	136	-	TGGAGTGGAAATTTAGGTTGTGGTC	TCTATCGATCGCTCGCTCATACAC	(TA)27ATAAAT(CG)3CA(CG)4AGCGAGC(GA)3T(AG)9A(TA)4TGTATGTGTATGTGAAAGAAAGAAAAA(AG)11(TG)8CG(CA)3	Kongjaimun et al. (2012)3
	cp07735	cowpea	genomic SSR	232	232	-	GCGTGTTGAAGCTAACTTTTTGGC	GGAAAGCATTAACAGGGATAAAGGG	(TA)33	Kongjaimun et al. (2012)3
	cp07766	cowpea	genomic SSR	196	196	-	GCGTGGAACAACTATAGCTCTGGG	TCATGGACGGTGGATGATTGTTAT	(TA)32	Kongjaimun et al. (2012)3
	cp07768	cowpea	genomic SSR	-	-	-	CATGCTGCGGAGTTGTAAGTGTCT	GCTTTCAAAATCTACACTGAAGGTTGG	(TA)25	Kongjaimun et al. (2012)3
	cp07770	cowpea	genomic SSR	290	290	-	TGCGTGTTGCATTAGTCATGTTTG	ACCCTTGAGACAGAAACCGACAAC	(TG)5G(GA)3TAGAGAA(AG)4AT(AG)11TTTAAA(TA)3	Kongjaimun et al. (2012)3
	cp07791	cowpea	genomic SSR	-	-	-	GAATCATCAAAGAATGATGCCGTC	GATCGAAAGGGGTTCAATCCAAAT	(TAT)3TCAACAAACAAT(TA)34	Kongjaimun et al. (2012)3
	cp07801	cowpea	genomic SSR	134	134	-	GTTGCAGCCATTTATGCTTTTCCT	GTGGTCATTCGACTCCTCTCGTTT	(AC)3TCACA(TA)41(TG)3	Kongjaimun et al. (2012)3
	cp07831	cowpea	genomic SSR	-	-	-	TCCCAAGACAATTTTGGATACCGT	ACCTCTTCGATGTGGAATGATAAG	(TA)27	Kongjaimun et al. (2012)3
	cp07842	cowpea	genomic SSR	135	135	-	TGGTTGAATTGGAAGATTGTGGGT	GCTATCACATGGGAGTATATGGAATCA	(TA)31	Kongjaimun et al. (2012)3
	cp07847	cowpea	genomic SSR	-	-	-	CTGAATGAGGTTTATTGATGCCGA	ACGGAAACATGCAAATAACCCAAG	(TA)37	Kongjaimun et al. (2012)3
	cp07857	cowpea	genomic SSR	135	135	-	CCGTAAAAGAATTTGTGGCAAACC	TGAACCCACCTACTTTCTTAAACACG	(TA)27AATA(AG)3	Kongjaimun et al. (2012)3
	cp07861	cowpea	genomic SSR	135	135	-	ACCGAAAGTCACAGATGACAACGA	CGTTTAGGGGATTTTGGTGATGAA	(TA)19A(TAA)9TATTT(TA)3	Kongjaimun et al. (2012)3
	cp07863	cowpea	genomic SSR	217	217	-	GCTTGTCCAGCCTGTGCTTTATGT	CCAAGAATGCAAGGCCTTAAACAG	(TA)23CACA(TA)4CATACATACATACA(TA)4CA(TG)5	Kongjaimun et al. (2012)3
	cp07971	cowpea	genomic SSR	99	99	-	CTGCAATTTATCCAATCCAACCGT	CCATCTGGCCAGTTCTTGGTAGTT	(TA)32	Kongjaimun et al. (2012)3
	cp07984	cowpea	genomic SSR	-	-	-	ATCCGTTCTTAACCGGAGACAATG	AAGGCGATTCTGCTACACAACAAG	(TA)27TTC(AT)3TTATTTCT(TA)3AAT(AG)3	Kongjaimun et al. (2012)3
	cp08002	cowpea	genomic SSR	-	-	-	GTTGATATCGTGGTTGAAGGAAAAG	TGAAATGTGGACACAAAAGAGGGA	(CTA)3AAGAA(TA)4AA(TA)8AA(TA)21AC(TA)4	Kongjaimun et al. (2012)3
	cp08008	cowpea	genomic SSR	127	127	-	ATTGTAGGGCTTGTACGCTAACGA	ACTCAATTTTCCTCCAATTGCTGC	(TC)3CTGGTTTTTTGTTTAA(TA)32	Kongjaimun et al. (2012)3
	cp08015	cowpea	genomic SSR	-	-	-	TGGTAGAAAGAAAATTGGACCAGGC	TGATAGAGGGAGCTGAACAGAGGA	(TA)42	Kongjaimun et al. (2012)3
	cp08017	cowpea	genomic SSR	136	136	-	CAGATCATTCAATCCAAAGGATGC	TCCTGTTTAAGGAAAAATAGGTCGC	(AT)3TAATATTACAACGT(TA)35	Kongjaimun et al. (2012)3
	cp08018	cowpea	genomic SSR	-	-	-	TCCAACATTTAAACCTCCCTTGTTG	CTGTCACGCATGAGACAAATATTGA	(TA)33	Kongjaimun et al. (2012)3
	cp08023	cowpea	genomic SSR	129	129	-	CCTCACTCTTTTTCTTTCGGTTAGCA	TGTCCACCTCTGCTCTTAAATGTT	(TA)41	Kongjaimun et al. (2012)3
	cp08042	cowpea	genomic SSR	-	-	-	GGCCATTCTGAGTAAAGAAAAGGC	TGGTAACGTGTAGCAATCATAGCA	(TA)27	Kongjaimun et al. (2012)3
	cp08092	cowpea	genomic SSR	238	238	-	TAAATGTCGTTGAATGGGCACAAC	GCCAAATTGGTACGTTCATCATTG	(TA)16T(AG)10ACACATAT(AG)5	Kongjaimun et al. (2012)3
	cp08102	cowpea	genomic SSR	-	-	-	GGATATTCCAGATAATGCAGACACG	TGAGACATGATCAAAAGTCGCTGA	(TA)29	Kongjaimun et al. (2012)3
	cp08116	cowpea	genomic SSR	114	114	-	CTTTTCATGGTTGTTTGGGCTTGT	CTTACGTGGTTGCTTTTCTGGCTT	(TA)30	Kongjaimun et al. (2012)3
	cp08179	cowpea	genomic SSR	-	-	-	TGAGTATTTGCTGCATGTGTTCCA	GCCAATATGAGCACACTTTTCACG	(TA)29	Kongjaimun et al. (2012)3
	cp08188	cowpea	genomic SSR	161	161	-	TTATCTTCAGCTTGCACAACCCAA	GGGACCTCATTTCTGTAAAATGGTTG	(TA)34	Kongjaimun et al. (2012)3
	cp08204	cowpea	genomic SSR	172	172	-	TGTGATTATTGCCCTCACGGTATG	TTTTGTCATGCTCTCCCTGAAACA	(TA)41TGCTCATATCAACTAGAAAGCAT(TAT)3	Kongjaimun et al. (2012)3
	cp08227	cowpea	genomic SSR	-	-	-	CCTCATGTCATATCTTAACTTCAGTGG	GCAGCTAAAATCCCCTCATTCTAA	(TA)6TTTAT(TA)26	Kongjaimun et al. (2012)3
	cp08239	cowpea	genomic SSR	197	197	-	GCTATGCATCGCTGTATCTTTTGA	TCATGAGTTTGGTTTGGCTCTTCA	(TA)30	Kongjaimun et al. (2012)3
	cp08255	cowpea	genomic SSR	229	229	-	GGCAAACGTTTCTTATCATGTCCC	TCACTTGGGTCTGAAAACTGGTCA	(TA)30AATATA(TG)4TCCTAATTATTATATCTCTATATGCTG(AT)3TGCTGCTGTTAATGGGACCTTTTCT(AC)3	Kongjaimun et al. (2012)3
	cp08267	cowpea	genomic SSR	293	301	4	ATATGAACGGAATACAACCACGCA	GCATCCATCGACAAGAGTTAGGCT	(CA)3TGTACATACA(TA)4A(TA)22	Kongjaimun et al. (2012)3
	cp08288	cowpea	genomic SSR	-	-	-	CCAAACTTATCCATAGACCAACTCA	TCAGGCGAGGTTAAGCATTGGTAT	(TA)3GTATTCATGTCTACA(TA)3AA(TA)37ATATGTTATTTGATAGTGAGGTAAT(TA)3AATTT(AG)3	Kongjaimun et al. (2012)3
	cp08299	cowpea	genomic SSR	129	129	-	CACACCCATCTCAACTCCTTGATG	GTGGTCCTGTCTCTGCCTCAGAAT	(TA)31TGTGTATG(TA)3(TG)6	Kongjaimun et al. (2012)3
	cp08304	cowpea	genomic SSR	257	257	-	ACGTTCATTGTTCCTTTCCCTCTG	GTGCTCGAAGAGTTCGTCTTCCTC	(AC)3AGACACTCACTCAAAG(CT)3GGG(TC)3AACTCACTCA(TC)18	Kongjaimun et al. (2012)3
	cp08316	cowpea	genomic SSR	139	139	-	CCAAAATTCATGCATCTCTGCAAAC	TGACACTGTTTAGAGATGGATTCG	(TA)33	Kongjaimun et al. (2012)3
	cp08357	cowpea	genomic SSR	-	-	-	AGCTAGAATTTTGGAACGTGGAGG	AATCATAGTGTCCCTGTAGAAGGAGTT	(TA)37	Kongjaimun et al. (2012)3
	cp08365	cowpea	genomic SSR	383	384	9	GTGGTGGTTGTGCAACATTTTTGA	TGTGAACTCCATTGAATTGTGGGT	(TA)39	Kongjaimun et al. (2012)3
	cp08382	cowpea	genomic SSR	-	-	-	TCGTTAAGGAGATCGATGCTAGACAG	GAAGCTAACATATCTGAGTCCATTGTG	(TA)14GA(TA)9CATAAAT(GA)3	Kongjaimun et al. (2012)3
	cp08467	cowpea	genomic SSR	108	108	-	TCTTTCTCCTTTAACTGTTTCTCCC	CCATAACCGTACTGGTTTTAAGGCA	(TA)32	Kongjaimun et al. (2012)3
	cp08486	cowpea	genomic SSR	-	-	-	GAGGGGACATACTTGAGATTTGGC	TCAGAAACACAGAAGAAGGGTGAA	(TA)33	Kongjaimun et al. (2012)3
	cp08497	cowpea	genomic SSR	110	110	-	ACCAAAACGCCAAAGTAGAGACCT	TGGGCCTTTTCCTGAACAACTAGA	(TG)3CTTCTCAATGCAAAGCTATCGATGGTT(TA)7AT(TA)5GG(TA)3CA(TA)12CATATT(TA)8AATATAAA(TA)6TG(TA)14TGGACA(TA)7CATACA(TA)3TGTATATGTCGATGG(AG)3	Kongjaimun et al. (2012)3
	cp08499	cowpea	genomic SSR	-	-	-	AACCTGAGGCCGACCTAGAATTG	GTTCAGGTTTCACCCTCACCCTAA	(TA)39	Kongjaimun et al. (2012)3
	cp08503	cowpea	genomic SSR	-	-	-	TTATCAGCATTAATGAACCGACCG	AATGTCTGGGTTTTGCAGAAAGGA	(TA)29	Kongjaimun et al. (2012)3
	cp08506	cowpea	genomic SSR	-	-	-	GCATAACTCATGAATGCCTCTCACA	CGGAAAGGTGAAATAGGAGATTGG	(TA)34	Kongjaimun et al. (2012)3
	cp08513	cowpea	genomic SSR	136	136	-	GCAGGAAGAAAGTCGTTTACTGCAA	GATATCAAGGACCTTCCTCCCCAC	(TG)9(TA)17	Kongjaimun et al. (2012)3
	cp08516	cowpea	genomic SSR	-	-	-	GGCTGAAATTAGTCATCAACACCTCA	AAAGAAAGAAAGCACCCCAAGTGC	(TA)41TCTTTT(TA)3CATTTTTTATCGGTAAATAAATAA(TA)3	Kongjaimun et al. (2012)3
	cp08531	cowpea	genomic SSR	101	101	-	GTGAAGACACTTTTTCGTTTGGGC	CAAGCTGATACCTTTCTTTTGTGGG	(TA)29	Kongjaimun et al. (2012)3
	cp08554	cowpea	genomic SSR	-	-	-	CCGAAGAGTATTTCATCAGCCTCA	CTGCTATTAGGACGATCCACTCCG	(TA)35	Kongjaimun et al. (2012)3
	cp08559	cowpea	genomic SSR	158	158	-	TGGAAAATAAGTGTCACACGGTGC	TCGTGTTTATTTCATGTACCCCCA	(TA)36	Kongjaimun et al. (2012)3
	cp08571	cowpea	genomic SSR	-	-	-	CAAAAAGGTGAGTGAGTGATTCCAA	CCTCAGTTGGCAAATCGGTTTTAG	(TA)37	Kongjaimun et al. (2012)3
	cp08576	cowpea	genomic SSR	109	109	-	AAATCTGACCCACGTGAACAAGGT	GTGTCGCATTTGGCTCCTTTTATT	(TA)30	Kongjaimun et al. (2012)3
	cp08585	cowpea	genomic SSR	-	-	-	TGAAATAGATGAAGCAAGGGCA	TCATTTTCCCTTTTGAGGTTGGAG	(TA)10(TG)19	Kongjaimun et al. (2012)3
	cp08616	cowpea	genomic SSR	416	416	-	TCTTCCCTTCTACCAATCCAAGAA	GGTTGGATTCACGTCATACTCCCT	(TA)42	Kongjaimun et al. (2012)3
	cp08652	cowpea	genomic SSR	-	-	-	GGGAAAGCAAAACCTTTCCATGAG	AGTTATGGGCACCGGGATTAAGAC	(TA)3TTTAAATCTGT(TA)17T(GAT)3AA(TTA)3	Kongjaimun et al. (2012)3
	cp08654	cowpea	genomic SSR	342	342	-	GTGCTAAAATAGTTTTGGCGGATAG	TTTTTAAGTTCAGTCCAGCACGCA	(TA)40	Kongjaimun et al. (2012)3
	cp08695	cowpea	genomic SSR	256	256	-	ATTAGTGGCGGCTCACAACAGTTC	ACGGCCTGTTGTCGGATAGAATAA	(TAA)3(TA)27	Kongjaimun et al. (2012)3
	cp08712	cowpea	genomic SSR	-	-	-	TGAATGGTTTTCTGGAAGAATGTGG	CACTCACGCCCTTCAACACATAAT	(TA)34TGTAAA(TA)9C(TA)4	Kongjaimun et al. (2012)3
	cp08729	cowpea	genomic SSR	152	152	-	AGGCTGATTCACTCACATACAGGC	CACATATCAGGGAAGCACAAGCAC	(TC)23(AC)15TTTT(TC)3	Kongjaimun et al. (2012)3
	cp08734	cowpea	genomic SSR	-	-	-	CAAAATCGGAACACCAAATAGCTC	ATCGCTCTCAACCATTCCTATCCA	(TA)28	Kongjaimun et al. (2012)3
	cp08763	cowpea	genomic SSR	-	-	-	CACGAAAGCTTGCTTTTTAGTTCG	TTAGTTTCACGTCCAGCTATGCCA	(TA)41	Kongjaimun et al. (2012)3
	cp08769	cowpea	genomic SSR	-	-	-	TGTCTTTTACATATTAACGGGTGCC	TCTCATAGACTCATAGAATTTCCCTCG	(TA)9TG(TA)11AA(TA)6	Kongjaimun et al. (2012)3
	cp08777	cowpea	genomic SSR	-	-	-	TCAGGACGACATGGATAAAGCAAG	TGTGACCTTAAGTAATGCTTCACGC	(TA)31AT(TA)3AT(TA)3TCGAGAAGACTTA(AT)3	Kongjaimun et al. (2012)3
	cp08780	cowpea	genomic SSR	-	-	-	ATCAAACCTATCCCCTCCTGCATT	TTGTCCGTCATCTTTTTCAACCAC	(TA)29ATCTAAATTGGCAATTAAGATT(TA)3	Kongjaimun et al. (2012)3
	cp08786	cowpea	genomic SSR	-	-	-	AGAAATTGATTGAGGCCATAGGCA	GGCCTTGGGATGGCTATGTTTAG	(TA)28	Kongjaimun et al. (2012)3
	cp08791	cowpea	genomic SSR	-	-	-	TTTGAGGTAGTCATCGCATAAGAAG	AACTTAGTGTGGTCAAGGTCTCCAAA	(TA)22GA(TA)12T(AC)7	Kongjaimun et al. (2012)3
	cp08803	cowpea	genomic SSR	-	-	-	TGTGACCTATTAAGACGGGAGAAAA	TCAAAACCTACACAGTACCTCCAGC	(TA)3TGAAATGATAAAATATAAAAGAAA(AT)3TTAAAGTGAGTATTTACGGTAAAT(TA)27	Kongjaimun et al. (2012)3
	cp08819	cowpea	genomic SSR	141	141	-	TTGTTTTTGCCTCTTCCTCTCAGC	TCAAGAGTAACCGAGCAAGATGACA	(TA)29AACCCTAAATACATGTATGAG(AT)3(TA)3	Kongjaimun et al. (2012)3
	cp08824	cowpea	genomic SSR	-	-	-	TGAGGTTATCCAGTTTTTGGGATG	TGTCCTATGTGAAGTTATTCCACCA	(TA)3CA(TA)29	Kongjaimun et al. (2012)3
	cp08831	cowpea	genomic SSR	-	-	-	TCGTATCGTGTATCGTGTTCATGC	AGTTATGCTTTCCGCATCCACATT	(TA)13AA(TA)14	Kongjaimun et al. (2012)3
	cp08861	cowpea	genomic SSR	-	-	-	TGCTATCAAATTGTATGGTGCAACG	GTGCCCTTGGCAAGAAATTATCAC	(TA)24GATATTTG(TA)3	Kongjaimun et al. (2012)3
	cp08952	cowpea	genomic SSR	-	-	-	ATACTGGTTGGTGGCGAGAATGAT	CTGTCGAGCTCTCCCATTCAAAGT	(TG)6(TA)26G(TA)3	Kongjaimun et al. (2012)3
	cp09101	cowpea	genomic SSR	242	242	-	TGTGCTGAATTAAAGTCGTGTCACT	CAGTGATACTTAATGGGCAAAAGCA	(TA)40CA(TA)3	Kongjaimun et al. (2012)3
	cp09102	cowpea	genomic SSR	122	122	-	CAAGAATTTGCTCCAATCCCTTTTC	AAGGGTGACCACAAATAAGGCAGA	(TA)3AA(TA)23	Kongjaimun et al. (2012)3
	cp09367	cowpea	genomic SSR	-	-	-	TTCGTCTTCTGACCAATATGTGAC	TAAGATGACCAGGAAGTTTCGCGT	(TA)7TTTAC(AT)3TATTT(TA)5AAATAA(TA)13	Kongjaimun et al. (2012)3
	cp09370	cowpea	genomic SSR	208	208	-	ACAGTTGCGAAGCTATGCTGTCAA	AGGCTCATACTCAACCATACCCCA	(AG)29	Kongjaimun et al. (2012)3
	cp09444	cowpea	genomic SSR	361	361	-	TCATCCCGAAAATGTGTTTACC	TCTACATTCGTATATCCATCCCCC	(TA)30AAATAA(AC)5GCGCGGGGAGA(TA)4TTTTTTAT(TG)3	Kongjaimun et al. (2012)3
	cp09452	cowpea	genomic SSR	135	135	-	TATCGATTCCACTTGCATCCACAC	TCACCCAATTTGAGTCTCCATCAA	(TA)32(TG)7AGTGCG(TG)3AGTGCGCGTGCGAGAGCTACAA(AC)3	Kongjaimun et al. (2012)3
	cp09502	cowpea	genomic SSR	135	135	-	CGTGTTTGTGGCCATAGAATTCAG	ATCGCTTGAACGAACGAACACAAC	(ATC)3TGCTATTCCATTCATTCAATCGTTC(AG)5GA(AG)6GA(AG)10AA(AG)4CG(AG)5	Kongjaimun et al. (2012)3
	cp09551	cowpea	genomic SSR	228	228	-	GATCTCGAAGACCTTCTCTGCTGG	AAGAGAAAGTGCAGGGGGTGGT	(TC)4GCA(CT)3(TCT)6AACGCCATTTGTAGTT(CCA)9C(TC)3T(TC)4(TTC)3	Kongjaimun et al. (2012)3
	cp09557	cowpea	genomic SSR	-	-	-	CGAAAAGGTCAGATCCAAAACACAA	ACTCCCATTAAATGTTTCTGGCCC	(AT)3TT(TA)20GAACAA(AG)4CG(TG)6GGTGCGGACTGT(CG)8	Kongjaimun et al. (2012)3
	cp09565	cowpea	genomic SSR	-	-	-	CATTTCGCTAAATCCAAATCCCCT	TCACTCTCACTCTCAAGTAAACACTCA	(TA)23TGTATAGATG(TA)3	Kongjaimun et al. (2012)3
	cp09604	cowpea	genomic SSR	246	248	8	TGTAATGGCACACTTCCCTGTGAT	TCATGTTTTCCAACAGGGTTCTCC	(TA)26	Kongjaimun et al. (2012)3
	cp09619	cowpea	genomic SSR	112	112	-	CCACACCACACTTTCATTCATTTCA	CCCACACTCTCACATTTATCACGC	(TCC)3AA(GT)3TTCT(TC)3TTTCTCTACAATTTT(TA)4TT(TA)12TGTG(TA)12AA(TA)4AAAAATGA(AG)6AAAAG(AC)3	Kongjaimun et al. (2012)3
	cp09620	cowpea	genomic SSR	132	132	-	TTGTTAGTCCAAGCACCCACCATA	CATCCATATGCATACAGCCACTTC	(AC)9A(TA)34(TG)14GGGGACGGGGGGGTATAGGG(AG)5CAAGAGCG(AG)4	Kongjaimun et al. (2012)3
	cp09633	cowpea	genomic SSR	-	-	-	TATGGTAACAACCGCTAAACGTGC	CATAACTACACGACCTCACGCCAG	(TA)23TTTTTTTG(TA)5	Kongjaimun et al. (2012)3
	cp09667	cowpea	genomic SSR	141	141	-	CCAGGTTCAAAAGACGACACCTTTA	GGAAAACTGGGGTTGCAAAATCTA	(TAT)30	Kongjaimun et al. (2012)3
	cp09687	cowpea	genomic SSR	-	-	-	TGTTGGGAGTGCTACAGGCTACAG	TCAACTTCCACACCAAGACCAGAA	(AC)7(TA)19	Kongjaimun et al. (2012)3
	cp09766	cowpea	genomic SSR	-	-	-	TCTAAAAGCGGCATGATTGAAAGG	CCGCCCCATATTTCTACTCACACT	(TG)3TTTTTAATAATTT(TA)19AAAAAAACTTATCAGTGTGA(GT)3ATTTTTTTTTTATAATAAAAAAAAA(TA)5TGTATTTCTGCGCGTGCTTGTTAAAAA(TA)3A(AT)3	Kongjaimun et al. (2012)3
	cp09781	cowpea	genomic SSR	-	-	-	CTGACGCATTCAGCATTTTACAGC	GGAAATACGGTTGCGTCCATGTAT	(AC)11A(TA)18T(AG)24	Kongjaimun et al. (2012)3
	cp09955	cowpea	genomic SSR	-	-	-	GGGTTAGAGCACCCTCAAATGTTTC	TTGCGAGGAGAACAACGTAAACAA	(TA)42	Kongjaimun et al. (2012)3
	cp09979	cowpea	genomic SSR	-	-	-	GGCGGGATACAGACTTAAACAAATG	GGAAAATATTGTTTGGGACCACCC	(TA)3ATAT(TA)3CAGGTCCCATTAAT(TA)26	Kongjaimun et al. (2012)3
	cp09985	cowpea	genomic SSR	253	280	2	TCTTTGCTTTGTAATCATGCCCCT	TGGTAAAGTTCACGTCAAGAACAGC	(CCT)4CCACCACCCCAACCGCCGCCA(CCT)3CCACCACCTCCACCTCCCCAT(CCA)6CCCCCTCCTCCACCC(CCA)3CCCCATCCCCATCCTCCT(CCA)4(CCT)6	Kongjaimun et al. (2012)3
	cp10075	cowpea	genomic SSR	370	370	-	GTACTGAAATGTGAACCGTTTTGAC	CGTGAGTGAGAGCACGCTTTCTT	(TA)19GAG(TG)4TTT(TA)7AAA(TA)7TTTTACACAAACAAAAAAAAAAAA(TA)5(TG)6ATG(TA)5AAAAAAAA(TA)5	Kongjaimun et al. (2012)3
	cp10086	cowpea	genomic SSR	158	158	-	ATAGTTGCAAGCAGACACGCTTTG	GACCAAAAAGCAAAACTGCCAAAC	(AT)3(TA)29	Kongjaimun et al. (2012)3
	cp10093	cowpea	genomic SSR	226	208	4	ATCATCCGCAAGCTAAACCTACCA	AACTCACATCACCCACGTGTCATT	(TAA)28	Kongjaimun et al. (2012)3
	cp10138	cowpea	genomic SSR	-	-	-	AAATAGTGTCGGGGTGGTTAGGGT	ACCGCACATAAATAAGCAGGCACT	(TA)7A(TA)32	Kongjaimun et al. (2012)3
	cp10143	cowpea	genomic SSR	-	-	-	CTGCGCCATTTTCAGGTACCTATC	CTCCCTATTTCCTACATTCTTCCAA	(TA)27	Kongjaimun et al. (2012)3
	cp10190	cowpea	genomic SSR	-	-	-	CTTCAACGTCTCTAATCAACGCGA	GGATCGTTCCAAAGCGATTGATCT	(TA)46	Kongjaimun et al. (2012)3
	cp10209	cowpea	genomic SSR	-	-	-	TGGTATCCAAACAATGGTGTTTCTC	TGGTGAACTCGTACATGTCGGATA	(TA)37	Kongjaimun et al. (2012)3
	cp10211	cowpea	genomic SSR	258	258	-	CATTCAACGCTGTGTAAGGTCCAG	TTGCAGAAGAGCTTTGTGATGAGG	(TA)35	Kongjaimun et al. (2012)3
	cp10247	cowpea	genomic SSR	-	-	-	AGAGATTGAAGAACGCGTGGTAGG	CGCTCTTCCTCAAACTTCCCTCTT	(AG)28	Kongjaimun et al. (2012)3
	cp10258	cowpea	genomic SSR	184	184	-	TGATACACCACTCACAGATATGCAA	GGGAAGTTTCTGCAAATCAAAAAGG	(CTT)3GTTATCAAAACCTG(TA)31	Kongjaimun et al. (2012)3
	cp10260	cowpea	genomic SSR	-	-	-	ATGCAACCAAATCTATGAACCGCT	TTTGTCTACACTCCATGGTGCCTC	(TA)38	Kongjaimun et al. (2012)3
	cp10271	cowpea	genomic SSR	199	197	7	AAGGAGTTCACTGTGTTGAGTGTGG	GGACTCTTTCCCTCTTTCTGCCTC	(TA)17T(AC)7TCAGACTC(AG)4GATATGTGTAATAG(TAT)3	Kongjaimun et al. (2012)3
	cp10285	cowpea	genomic SSR	-	-	-	GATGGGCACAAAACAACATGATCTA	TACAAATCATCGAAGGGTCGTCAA	(TA)29	Kongjaimun et al. (2012)3
	cp10311	cowpea	genomic SSR	210	210	-	TGAGCAATCATCCACTAACCACCT	ATGATAGTGCAGAATTCAAGGCCC	(TA)25	Kongjaimun et al. (2012)3
	cp10313	cowpea	genomic SSR	-	-	-	AAGAAGATAAAAGCTGTCCCCACA	TCGAATAAGGCAGTAAGATAGGAGTGA	(TC)31	Kongjaimun et al. (2012)3
	cp10322	cowpea	genomic SSR	195	195	-	ACAATTAGCCATGGTGCATTTGAC	TGATGTTGGCTTCTGATGAATGGT	(TA)30	Kongjaimun et al. (2012)3
	cp10384	cowpea	genomic SSR	412	412	-	TGGATGACAACCATTGTTCAAGCTA	AGAAGGAAATTGCTCACGCTTGTT	(TC)14(TA)28	Kongjaimun et al. (2012)3
	cp10412	cowpea	genomic SSR	-	-	-	TTTTGGTCTTCCGTCTTCTCATTG	TGAACTGCATAAACTCGCCTATGTT	(AT)3GTCAAAT(TA)23TGTATATTATAAA(TA)3	Kongjaimun et al. (2012)3
	cp10423	cowpea	genomic SSR	-	-	-	CATGTTTCAAAGGCTCACAATGCT	CAAAAGGATAGTTTGGATGGATTGG	(GT)3A(TA)8TG(TA)7CA(TA)6TGTATACC(TA)4	Kongjaimun et al. (2012)3
	cp10438	cowpea	genomic SSR	-	-	-	ATGAATTCAATGGGTCAGTTCG	CTACTTATTCGGTCGGCTTAGGGG	(TA)19TC(TA)4CTTAAAATATCCCTT(TA)4	Kongjaimun et al. (2012)3
	cp10443	cowpea	genomic SSR	108	108	-	TGAAATGGGTACCACTTTTAACGCA	TTGTTAGAAGGGTGAGATGGTTATG	(TA)32	Kongjaimun et al. (2012)3
	cp10454	cowpea	genomic SSR	225	225	-	GTGATGCTTTGGAACAAGGAACAT	TGCACCCACGTTAGTAGGAAAAA	(TAA)30TGA(TAA)5TGAGAA(TAA)4CAATAATAACAA(TAA)10	Kongjaimun et al. (2012)3
	cp10507	cowpea	genomic SSR	-	-	-	GCTGAAAGAGTGGCAATTACAGAA	TATGACAACTCGGCCTTTGAG	(AT)3TATTCTAAACCAAAAGGCAAAGAAACT(AC)6AAA(TA)20	Kongjaimun et al. (2012)3
	cp10517	cowpea	genomic SSR	303	303	-	CCAATGGGGACAAATGAAGAACAT	AGATAGCGACGGATCTTCCAGAAA	(TA)4CATACA(TA)18TTATTTTTTTAATTTTAATTTTA(AT)3TT(TA)3TTT(TA)3TTTGGCATCTATTTTTT(TA)3TT(TA)3	Kongjaimun et al. (2012)3
	cp10527	cowpea	genomic SSR	-	-	-	TCTTTCACTGTTATGGGGCACTCA	GGTTGTGGTTACTGGTCAGTGTGC	(GT)3CGGTCTCCAATGTACAAATAA(TA)23TGTATATCAGAATTCAACC(CA)3	Kongjaimun et al. (2012)3
	cp10549	cowpea	genomic SSR	-	-	-	CATTTGCCTTCCTCATGCCAATAC	CCATTCAGACCACCAATCACGTT	(TC)15(TA)27	Kongjaimun et al. (2012)3
	cp10612	cowpea	genomic SSR	270	270	-	AGGCTGGATACTTTGGCTGTCTTG	TGTCAGACACTGCTACACCCATGA	(TA)31	Kongjaimun et al. (2012)3
	cp10615	cowpea	genomic SSR	-	-	-	GGCCAACCAAATTACGATAGGGAG	ATCACCCCAAATTTCTGGCCTTAG	(TA)33	Kongjaimun et al. (2012)3
	cp10627	cowpea	genomic SSR	292	292	-	CATGAGATTAAGAATCAAGGCCCA	TCGTCATTAAACCACATGACCGTT	(TA)27	Kongjaimun et al. (2012)3
	cp10639	cowpea	genomic SSR	510	510	-	CGGTCAAAACGTGATGACAGAAGA	GGGCAGCACAGAACTAAAAGAGGA	(TA)9TGTATTTATATT(TA)12TG(TA)10	Kongjaimun et al. (2012)3
	cp10648	cowpea	genomic SSR	114	114	-	ATCACACCAAGGCCAAGTCTAAGC	TCCAAGGGAGGAAGTCACGAATAA	(TC)17(TA)15	Kongjaimun et al. (2012)3
	cp10667	cowpea	genomic SSR	199	199	-	CCAAGGATTCATTCCTCACAAACC	TATTGGCCACTGAGAAACCCAACT	(TG)3(TA)3GAGAAGAAAAGGG(AG)3ATGAGAATAGATATAAGAAGTAAAA(TA)10T(AG)17	Kongjaimun et al. (2012)3
	cp10668	cowpea	genomic SSR	253	253	-	GGTTTATGCCAAAAGAGAACTCACCA	GGCAGGTAACATATGAAGACATCATCC	(TAT)3GAGTACTCTAACGTT(TA)4GTTAATTTTTATAA(TA)21	Kongjaimun et al. (2012)3
	cp10690	cowpea	genomic SSR	305	303	6	CTTCCCCTGCTTAAATTGGTTTCC	AATTGGAGCAGAGTTGGTTGCTTC	(TA)39(TG)9	Kongjaimun et al. (2012)3
	cp10734	cowpea	genomic SSR	-	-	-	ATCACCATGAGAAGGAAGTCCACC	TGTATGCTCTTCCTCTTTCTAAGTGC	(TA)19T(AG)17	Kongjaimun et al. (2012)3
	cp10757	cowpea	genomic SSR	242	242	-	TGACGAATCTGTCATTTGTGGATG	AGAGGAGCATGTTTGGTGCTTTTC	(TC)3CCTGTATACGTACTTTC(AC)3AGACATGTGCATATAA(TA)27	Kongjaimun et al. (2012)3
	cp10853	cowpea	genomic SSR	-	-	-	GTAAAGTTCGATTGCGGCATAACA	GCCAGTTTCGCACACTTCCTAGTT	(TA)33	Kongjaimun et al. (2012)3
	cp10882	cowpea	genomic SSR	-	-	-	GGCAATGTATGGTCCAAATCAAAC	GGAGATGGTGTTCGTAAATTTCCAT	(TA)34AGCTTTTAATGAATAAAAA(TAA)3	Kongjaimun et al. (2012)3
	cp10889	cowpea	genomic SSR	-	-	-	CAACCCTCATTGTCACCCCTAATC	TCGTGGAAGATGGTATATTGGTTTG	(TA)26	Kongjaimun et al. (2012)3
	cp10892	cowpea	genomic SSR	-	-	-	CAAGATGTGACGAGTGAGTTAACCAAA	GACTTACTCCAACCTCCCACCAAA	(TA)30	Kongjaimun et al. (2012)3
	cp10898	cowpea	genomic SSR	-	-	-	TTGGAAACAACGGCCTTATTCAAC	CACCATGAATGCTCAAGGCTTATT	(TG)3ATTAAA(TA)41AATAAGTGTTT(TG)3	Kongjaimun et al. (2012)3
	cp10903	cowpea	genomic SSR	-	-	-	TCCAATCCAAACAAACCCTAAGTGA	CTTTGGAGAATGACCCATGAAAAGA	(TA)33	Kongjaimun et al. (2012)3
	cp10915	cowpea	genomic SSR	193	193	-	GATGACCCAAATTCTTCCACAAGC	AAGGGGGCAACAACTGACTTTAGG	(CTT)3CCTTTACCAAAAGAAAATAA(TA)37	Kongjaimun et al. (2012)3
	cp10917	cowpea	genomic SSR	153	153	-	TCAGACACAACTTTGATTTGCTCG	TCGGAAACAGGTTCACCTACTCCT	(TA)26	Kongjaimun et al. (2012)3
	cp10923	cowpea	genomic SSR	-	-	-	CCTGTTAAATCTCGTCTATGCTACCGA	CACTGGTGCAGGATTGCAATATAA	(TA)29	Kongjaimun et al. (2012)3
	cp10936	cowpea	genomic SSR	149	149	-	TTAGTGCCGAATATTTGTTTGGGG	CATGACTTGTGAAGCCGAGAATTG	(TA)38AAAGAAAAATAACTAACAGTT(AGA)3	Kongjaimun et al. (2012)3
	cp10941	cowpea	genomic SSR	250	242	9	TGATCCTCTGCATTCAATGTTGGT	TTTTTCAGACCAGATGACACCCCT	(TA)33	Kongjaimun et al. (2012)3
	cp10971	cowpea	genomic SSR	352	352	-	TTTTACCCTCTCCTTCTGTCAAGTG	AGGTGACCACAAGATGAAAGGCTC	(TA)23ACAATTTATGAAAA(AAT)3	Kongjaimun et al. (2012)3
	cp10986	cowpea	genomic SSR	227	-	7	CCATTTGGAACCCAAACTCATCAT	GCAGGTATACGTACCCCAAAGCAA	(TA)36T(TC)4	Kongjaimun et al. (2012)3
	cp10991	cowpea	genomic SSR	-	-	-	CCCAATCGCAATTTGACATACATC	GTTGTTTGACGTTTTTCCTCCTCG	(AC)3GTTATGATGCATAGAT(TA)26	Kongjaimun et al. (2012)3
	cp10994	cowpea	genomic SSR	186	186	-	CGGTCTTCATAAAAATGAATCCAGC	ACCTCAAACGCTTCGATTATCTGC	(TA)3CGC(AG)28	Kongjaimun et al. (2012)3
	cp11005	cowpea	genomic SSR	-	-	-	CAGGTGCAAAGTCTCACATTTCAA	GCTCTATGGGCTACTATCATTGTTCCA	(TA)28	Kongjaimun et al. (2012)3
	cp11006	cowpea	genomic SSR	111	111	-	TTGGTTAAGATCTTCAGGACGGGA	GCAACTTATTGACTCATCCATTTCG	(TA)38	Kongjaimun et al. (2012)3
	cp11009	cowpea	genomic SSR	180	180	-	CGAACTTCATTCGTTCCATGTTGA	AATTTCAGGTGGGTCGAGGTGTAA	(TA)25AATAAAGATTGTTATTCATATT(TG)4	Kongjaimun et al. (2012)3
	cp11025	cowpea	genomic SSR	135	135	-	TGCAAACCATGGTCTATGTTGAGG	TTCAGTGTACGACAGCAGCAATGA	(TA)31	Kongjaimun et al. (2012)3
	cp11035	cowpea	genomic SSR	-	-	-	GGATTTGTTGATTTGGAATGGTGC	AACGTCAATTCCCTCCACAACAAT	(TA)33	Kongjaimun et al. (2012)3
	cp11058	cowpea	genomic SSR	134	134	-	ACGTAGCCACCAACCACCTTATTC	GATCAGTGGAATCACCACCATCAC	(TA)43TCTCTATGTTCTTTGGCATCGTCA(TA)3	Kongjaimun et al. (2012)3
	cp11079	cowpea	genomic SSR	294	298	2	GAACCGTGTTAAAAGCACAGAGGG	ATTACCTGGCCACCTGCTTCTGTA	(TA)24T(AG)16	Kongjaimun et al. (2012)3
	cp11089	cowpea	genomic SSR	-	-	-	ATAACTTCGCCCTCCGATCATTTT	TGGTGTCATATAAACTATGTGTCTGGG	(TA)37	Kongjaimun et al. (2012)3
	cp11111	cowpea	genomic SSR	109	109	-	CAAAACAGAAGTCTTTGGTTCGACA	GCAATTGTACCAGCCGAAGGTAAG	(TA)36	Kongjaimun et al. (2012)3
	VM24	cowpea	genomic SSR	145	145	-	TCAACAACACCTAGGAGCCAA	ATCGTGACCTAGTGCCCACC	(AG)15	Li et al. (2001)4
	VM27	cowpea	genomic SSR	209	207	9	GTCCAAAGCAAATGAGTCAA	TGAATGACAATGAGGGTGC	(AAT)5···(TC)14·(AC)3	Li et al. (2001)4
	VM32	cowpea	genomic SSR	171	173	6	GAAAAAGGGAGGAACAAGCACAAC	AGCGAAAACACGGAACTGAAATC	(AG)10	Li et al. (2001)4
	VM37	cowpea	genomic SSR	279	279	-	TGTCCGCGTTCTATAAATCAGC	CGAGGATGAAGTAACAGATGATC	(AG)5·(CCT)3·(CT)13	Li et al. (2001)4
	VM40	cowpea	genomic SSR	224	224	-	TATTACGAGAGGCTATTTATTGCA	CTCTAACACCTCAAGTTAGTGATC	(AC)18	Li et al. (2001)4
	VM71	cowpea	genomic SSR	209	209	-	TCGTGGCAGAGAATCAAAGACAC	TGGGTGGAGGCAAAAACAAAAC	(AG)12·(AAAG)3	Li et al. (2001)4
	VM72	cowpea	genomic SSR	291	291	-	TGCTGAAGTGAACAATCGC	CCTTCTCCAACAACTCTAC	(AG)20	Li et al. (2001)4
	PV-ag003	common bean	genic SSR	141	141	-	TCACGTACGAGTTGAATCTCAGGAT	GGTGTCGGAGAGGTTAAGGTTG	(AG)8	Yu et al. (2000)5
	PV-at002	common bean	genic SSR	313	313	-	GTTTCTTCCTTATGGTTAGGTTGTTTG	TCACGTTATCACCAGCATCGTAGTA	(AT)8	Yu et al. (2000)5
	PV-atcc001	common bean	genic SSR	242	242	-	ATGCATGTTCCAACCACCTTCTC	GGAGTGGAACCCTTGCTCTCATC	(ATCC)3(AG)2(TAC)3	Yu et al. (2000)5
	PV-cca003	common bean	genic SSR	97	97	-	GCAAGAGAACACTGAAGAGGATCG	GACATTACTCATTTCATCATCTACTACACG	(CCA)5	Yu et al. (2000)5
	PV-ccct001	common bean	genic SSR	149	149	-	CACCAATGTCTCCGGCGCA	CGGTTGCCGTCGAATGTGAT	(CCCT)3	Yu et al. (2000)5
	PV-cct001	common bean	genic SSR	165	165	-	CCAACCACATTCTTCCCTACGTC	GCGAGGCAGTTATCTTTAGGAGTG	(CCT)7	Yu et al. (2000)5
	PV-ctt001	common bean	genic SSR	254	254	-	GAGGGTGTTTCACTATTGTCACTGC	TTCATGGATGGTGGAGGAACAG	(CTT)3(T)3(CTT)6	Yu et al. (2000)5
	PV-ggc001	common bean	genic SSR	235	235	-	CTGAAGCCCGAATCTTGCGA	CGCGAGAGGTGAACGAAAGC	(GGC)5	Yu et al. (2000)5
	BM3	common bean	genomic SSR	166	166	-	CAGAAGTGCTTATCCCCGAG	TGAAATCTTCCCCTCCTTCA	(GAA)3GATGAA(GCA)2(GAA)4	Gaitán-Solís et al. (2002)6
	BM142	common bean	genomic SSR	135	135	-	TTCCGCTGATTGGATATTAGAG	AGCCCGTTCCTTCGTTTAG	(GA)10A(GA)15	Gaitán-Solís et al. (2002)6
	BM146	common bean	genomic SSR	258	258	-	GAGATGAGTCCTTTCCCTACCC	TGCAGACACAATTTATGAAGGC	(CTGTTG)4···(CTG)4···(TTG)3(CTG)3···(CTG)4	Gaitán-Solís et al. (2002)6
	BM148	common bean	genomic SSR	294	294	-	TTGAAACTCTCTTTGCAGACAC	AACTAATCCATTTGCACTACCC	(CAG)5···(CAA)5···CAT(CAA)3CAT(CAA)3	Gaitán-Solís et al. (2002)6
	BM149	common bean	genomic SSR	229	229	-	CGATGGATGGATGGTTGCAG	GGGCCGACAAGTTACATCAAATTC	(TGC)6(TAG)3	Gaitán-Solís et al. (2002)6
	BM157	common bean	genomic SSR	110	112	6	ACTTAACAAGGAATAGCCACACA	GTTAATTGTTTCCAATATCAACCTG	(GA)16	Gaitán-Solís et al. (2002)6
	BM164	common bean	genomic SSR	138	138	-	CCACCACAAGGAGAAGCAAC	ACCATTCAGGCCGATACTCC	(GT)9(GA)21	Gaitán-Solís et al. (2002)6
	BM166	common bean	genomic SSR	138	138	-	AAAGTGGGAGAGAAACACTACACC	GATGCTGGCTTTCCATTGAG	(CA)3T(CA)7	Gaitán-Solís et al. (2002)6
	BM170	common bean	genomic SSR	168	168	-	AGCCAGGTGCAAGACCTTAG	AGATAGGGAGCTGGTGGTAGC	(CT)5CCTT(CT)12	Gaitán-Solís et al. (2002)6
	BM181	common bean	genomic SSR	180	180	-	ATGCTGCGAGTTAATGATCG	TGAGGAGCAAACAGATGAGG	(CT)17	Gaitán-Solís et al. (2002)6
	BM189	common bean	genomic SSR	102	102	-	CTCCCACTCTCACCCTCACT	GCGCCAAGTGAAACTAAGTAGA	(CT)13	Gaitán-Solís et al. (2002)6
	BM200	common bean	genomic SSR	231	231	-	TGGTGGTTGTTATGGGAGAAG	ATTTGTCTCTGTCTATTCCTTCCAC	(AG)10	Gaitán-Solís et al. (2002)6
	BM201	common bean	genomic SSR	192	192	-	TGGTGCTACAGACTTGATGG	TGTCACCTCTCTCCTCCAAT	(GA)15	Gaitán-Solís et al. (2002)6
	BM202	common bean	genomic SSR	138	138	-	ATGCGAAAGAGGAACAATCG	CCTTTACCCACACGCCTTC	(GA)9GT(GA)4	Gaitán-Solís et al. (2002)6
	BM212	common bean	genomic SSR	215	215	-	AGGAAGGGATCCAAAGTCACTC	TGAACTTTCAGGTATTGATGAATGAAG	(CA)13	Gaitán-Solís et al. (2002)6
	GATS11	common bean	genomic SSR	229	229	-	CACATTGGTGCTAGTGTCGG	GAACCTGCAAAGCAAAGAGC	(CT)8CA(CT)2GTTT(CT)4	Gaitán-Solís et al. (2002)6
	BMd-2	common bean	genic SSR	103	103	-	AGCGACAGCAAGAGAACCTC	CAACAAACGGTGATTGACCA	(AT)9	Blair et al. (2003)7
	BMd-4	common bean	genic SSR	151	151	-	CTCCACTACCCCAAACAGTACC	TTTGAGGAAATGGTTGTTTGGT	(ACC)4	Blair et al. (2003)7
	BMd-5	common bean	genic SSR	114	114	-	CGTGGACTTGAATGGTTTCAG	TCCTTACCCTGTTCTGCTTCTC	(CAA)5	Blair et al. (2003)7
	BMd-6	common bean	genic SSR	118	118	-	CATCGAATGCCCAAGAGAATA	CTCACTGTCTTCCATCCAAGC	(TCC)5	Blair et al. (2003)7
	BMd-7	common bean	genic SSR	255	255	-	GGATATGGTGGTGATCAAGGA	CATACCCAATGCCATGTTCTC	(TGG)5	Blair et al. (2003)7
	BMd-10	common bean	genic SSR	116	116	-	GCTCACGTACGAGTTGAATCTCAG	ATCTGAGAGCAGCGACATGGTAG	(GA)8	Blair et al. (2003)7
	BMd-11	common bean	genomic SSR	144	144	-	GCTCAACATTCCAGAGGCTAA	TCAAACCTACATAAATAAAACAAAACA	(GA)8	Blair et al. (2003)7
	BMd-12	common bean	genomic SSR	168	168	-	CATCAACAAGGACAGCCTCA	GCAGCTGGCGGGTAAAACAG	(AGC)7	Blair et al. (2003)7
	BMd-20	common bean	genic SSR	-	-	-	GTTGCCACCGGTGATAATCT	GTGAGGCAAGAAGCCTTCAA	(TA)5	Blair et al. (2003)7
	BMd-44	common bean	genomic SSR	161	161	-	GGCAGCTTACTAACCCGAAA	TTCCTTCCCCTTTCTTCTCC	(GA)5	Blair et al. (2003)7
	BMd-48	common bean	genic SSR	120	120	-	CCCCACCAACTCTTTCTTCC	CAGAATTGACTTGGCGAGAA	(CT)5	Blair et al. (2003)7
	BMd-49	common bean	genic SSR	107	107	-	TCTCTTCCTTACCCTGTTCTGC	GGTTCAATGCTGGCTGAGA	(AAC)4	Blair et al. (2003)7
	AIA	common bean	genic SSR	160	160	-	TTCCAACAGAGAGAGGGTAA	TAGTCCTTGCTTTCTTTTGC	(AG)5	Guerra-Sanz (2004)8
	AY1	common bean	genic SSR	228	228	-	ATCAGGGTCTGTCATGATCT	CCTCCTCTCTTCTTGTTCCT	(AT)5	Guerra-Sanz (2004)8
	BETAG	common bean	genic SSR	204	204	-	ACCCTTCTCTCAAAACCACT	AACCTTGCTTGGATGAGATA	(CT)5	Guerra-Sanz (2004)8
	GLU	common bean	genic SSR	197	197	-	GCCAATTCTTCAACCCTAAT	AGAGCATGAGAAAGTGTTGG	(TC)5	Guerra-Sanz (2004)8
	VES0004	azuki bean	genic SSR	-	-	-	ATTATAACTCGTGCGTGCCC	TCTGAAGGAACACGCTGATG	(AT)28	Chankaew et al. (2014)9
	VES0005	azuki bean	genic SSR	-	-	-	AGGATGGAAATGGCTAGGCT	ATCAAATCACATGAAGGCCC	(AT)26···(AT)8	Chankaew et al. (2014)9
	VES0006	azuki bean	genic SSR	158	158	-	GTGTTCCATTCCCATTCCAC	ATTGGAGGGCCGTTAAGAGT	(AAG)14	Chankaew et al. (2014)9
	VES0008	azuki bean	genic SSR	139	139	-	CCTGCTCGGAATGAGAGTTC	CCCACATGGACTTTGTTTTT	(GGT)10	Chankaew et al. (2014)9							acactctgct ctttcttctc tctctctctc tctctctctc acacagacca gacacaatgt
	VES0009	azuki bean	genic SSR	237	237	-	TCTCTCACCCCCTTAACCCT	TCGCAGAATTCGGAGAACTT	(AG)19	Chankaew et al. (2014)9							61 ccaaagaact caccgaagag ggtcaacaaa ggaaggacta ctacgaccct cctcccgccc
	VES0011	azuki bean	STS	260	260	-	CACGAGGAACACACTCTGCT	TCCTTTGTTGACCCTCTTCG	-	Chankaew et al. (2014)9							121 ctctcatcga cctcgccgag atcaagctct ggtccttcta cagagccctc atcgccgagt
	VES0012	azuki bean	STS	126	128	3	AGGCCCCGTTACTCTCTCTC	CGCAACAGAAAAAGGGGTTA	-	Chankaew et al. (2014)9							181 tcatcgccac cctcctcttc ctctatgtca ccgtcgccac cgtcatcggt cacaagaaac
	VES0014	azuki bean	genic SSR	272	272	-	CACACATCCAGTGCCATTTC	AAATCCTGGAGGCCCTCTT	(ATC)8	Chankaew et al. (2014)9							241 agaccggtcc ttgtgacggc gttggccttc tcggcatagc ctgggccttc ggtggcatga
	VES0017	azuki bean	genic SSR	154	154	-	ACGAAAGAGTCCGCTTGAAA	GATGGAAGGGGTTGTTGCTA	(AAC)8	Chankaew et al. (2014)9							301 tcttcgttct cgtttactgc accgccggca tttccggtgg acacataaac ccagcggtca
	VES0019	azuki bean	genic SSR	275	275	-	GGCTCACACTCATTCTTCCC	TCACACGAGCTGTCTATGCC	(ATC)7	Chankaew et al. (2014)9							361 cttttggcct cttcctggcg cgcaaggtct cgttgatccg tgccgttctc tacattgtag
	VES0021	azuki bean	genic SSR	224	224	-	GAGTCACATGCAAAAGGTCG	GGAACACTGTGTGCAAGATCA	(ACT)7	Chankaew et al. (2014)9							421 cacagtgcct tggtgctatc agcggcgtcg ggttggtgaa ggccttcatg aagcatccct
	VES0022	azuki bean	genic SSR	282	282	-	CTGTTCCCGGACATTGTTCT	GCTCAGCGATCAAATTCCTC	(GGT)10	Chankaew et al. (2014)9							481 acaactccct cggcggcggt gccaactccg tcagttctgg ctactccaaa ggcactgctc
	VES0024	azuki bean	genic SSR	305	305	-	GCTCCAGAGAGAGGAGCAAA	CCAATTGCCCTTGATCATTC	(AT)12	Chankaew et al. (2014)9							541 tcggtgccga gattatcggc acatttgtgc ttgtctacac cgttttctct gccaccgacc
	VES0025	azuki bean	genic SSR	156	156	-	CCCACTCTTGGAATGGAAAA	TTGGTGAGCAATGTTGTGGT	(AT)12	Chankaew et al. (2014)9							601 ccaagagaag cgcgcgtgac tctcatgtcc ccgtgttggc tccattaccc attgggttcg
	VES0026	azuki bean	genic SSR	260	260	-	TCCCTTACTGTTAGGCCATCC	AGGTCCACAACTTCCACCAA	(AAAT)4	Chankaew et al. (2014)9							661 ccgttttcat ggttcacttg gctaccatac ccattaccgg taccgggatt aacccggcca
	VES0028	azuki bean	genic SSR	292	292	-	CCTGAGCAACATCGGAATCT	TCCCTTCCTTTAACCCCAAC	(AAG)9	Chankaew et al. (2014)9							721 ggagcttcgg agctgctgtc atctacaaca atggcaaagt ttgggatgac cattggatct
	VES0029	azuki bean	genic SSR	213	213	-	TGCTACACAAAACCAAGGCA	AAACGTAGCTACCACCACCG	(ATC)6	Chankaew et al. (2014)9							781 tttgggttgg accgttcgtg ggagcgttgg cggcggcggc ataccaccag tacatactga
	VES0030	azuki bean	genic SSR	-	-	-	GCCACAAGCTCAAAGACCTC	ATTCAGGGATGGTGACAAGC	(AAC)7(AAG)7	Chankaew et al. (2014)9							841 gagcagcggc tatcaaggcg ttggggtc
	VES0031	azuki bean	genic SSR	-	-	-	ACCTTTCGGCATTTTCCTCT	AAGAAGAAGGGGTTCGCATT	(GGA)8	Chankaew et al. (2014)9
	VES0038	azuki bean	genic SSR	326	326	-	TGCTTGCCTTTTTCTTTTCC	GAGCAGAGGAGATTTTTGGG	(AAC)6	Chankaew et al. (2014)9
	VES0039	azuki bean	genic SSR	187	187	-	AACTTACCCACCTGCAAACG	GAGGAGGGTGAACTGGAACA	(GGT)10···(ATC)7	Chankaew et al. (2014)9
	VES0042	azuki bean	STS	-	-	-	GGGTATTGGTTGTTGGGTTG	TTTGACCAACAAAGGGGACT	-	Chankaew et al. (2014)9
	VES0044	azuki bean	genic SSR	128	128	-	CCTCATTCTTACATCCTTAAACACTTG	CCAGAAGAATCACCAGCCAT	(AAG)8	Chankaew et al. (2014)9
	VES0046	azuki bean	genic SSR	261	261	-	CCGAACCCTATCTTGTGTGG	GTGATCGATGAGGGAAGGAA	(AAT)5···(AAG)8	Chankaew et al. (2014)9
	VES0050	azuki bean	genic SSR	221	224	9	TCAATCCCGACACAAAATGA	GCTAAATTGGTTGCACGGTT	(ATC)10	Chankaew et al. (2014)9
	VES0051	azuki bean	genic SSR	318	318	-	GCGAGAACCTTCTTACCCCT	TCCTGCAAGAGACTGTGGTG	(GGGT)7	Chankaew et al. (2014)9
	VES0053	azuki bean	genic SSR	194	194	-	CGCCTTCTTCTTCACTCCAC	AGCAGAGAAGGGCAAGTTGA	(AG)11	Chankaew et al. (2014)9
	VES0057	azuki bean	genic SSR	231	231	-	CAAGAAGGAATTGGAATCGG	CGAAATGAATTTTTAGTTCCGC	(AT)11	Chankaew et al. (2014)9
	VES0060	azuki bean	genic SSR	265	265	-	CGATTGCCAAGCACAGACTA	ACAACCGATGACCCTCTCAC	(GGA)8···(ATC)7	Chankaew et al. (2014)9
	VES0064	azuki bean	genic SSR	268	268	-	ACGACAACGATGACGATGAA	ACGAAGCGATTGTTCTCGAT	(ACG)7	Chankaew et al. (2014)9
	VES0068	azuki bean	genic SSR	-	-	-	CACTCCAATCTTCAGCACCA	ACGTGGAGGTCACTGTAGGG	(AAC)5	Chankaew et al. (2014)9
	VES0070	azuki bean	genic SSR	272	272	-	GACCCTTTTGGGACTGAACA	AGGGAACCGAGTAGCTGGAT	(ATC)7	Chankaew et al. (2014)9
	VES0071	azuki bean	genic SSR	364	364	-	AAGAAAGATGATGCGCCTGT	ACTTTCCTCAGCAACTGCGT	(AAG)6	Chankaew et al. (2014)9
	VES0073	azuki bean	genic SSR	-	-	-	TGATGATCGGTGTTCTTGGA	CAGTGGAAGGACTGGGTTGT	(AAC)7	Chankaew et al. (2014)9
	VES0074	azuki bean	genic SSR	355	355	-	CCAAAACCCTAACTCGTCCA	GAGACCTAAACACCCGTCCA	(AAG)6	Chankaew et al. (2014)9
	VES0077	azuki bean	genic SSR	179	179	-	CAAAGGCCATCCTCAACTTC	TCCCGAAAACAGTTCACCTC	(GGA)8	Chankaew et al. (2014)9
	VES0078	azuki bean	genic SSR	134	134	-	AAGGGAAAGGAACAACACCC	GAGGTGGTGCTGGAATAGGA	(GGT)7	Chankaew et al. (2014)9
	VES0081	azuki bean	genic SSR	362	362	-	TCAGCGACTCAATCAGGATG	GCTGGAGATGGTTCATTGGT	(AGC)9···(AGC)7	Chankaew et al. (2014)9
	VES0083	azuki bean	genic SSR	254	2564	-	TTCTTCACCCTCTCCTCCCT	TGAACTCAGCAAAGTCCACG	(GGT)7	Chankaew et al. (2014)9
	VES0084	azuki bean	genic SSR	234	234	-	GGTGGGAAATTGAAGCTGAA	TCTCCTCTCTGCCGGAGTAA	(AAG)8	Chankaew et al. (2014)9
	VES0085	azuki bean	genic SSR	178	178	-	TTGATACGGCCACTTTCTCC	CGGATTGGTTGTTTTCACCT	(AC)9	Chankaew et al. (2014)9
	VES0090	azuki bean	genic SSR	378	378	-	TCAACCTCTCCAATCGTTCC	TGGCTGAGATTCAGCACAAC	(GGC)9	Chankaew et al. (2014)9
	VES0091	azuki bean	genic SSR	215	215	-	CAGCACATTACAAGGCAGACA	GTTCGCCAATCGTTCAGAAT	(AAAT)5	Chankaew et al. (2014)9
	VES0092	azuki bean	STS	397	397	-	CACGAGGGTTGTTTAAAGCG	CTTTGTTGGCCACCATTTCT	-	Chankaew et al. (2014)9
	VES0093	azuki bean	genic SSR	185	185	-	CCTTCCATGTGAGGCTGATT	CGGGAGTATCGATCCACTGT	(AC)10	Chankaew et al. (2014)9
	VES0094	azuki bean	genic SSR	327	327	-	AGGCCATTGATATTTGATTCC	GCATCACTCTCCAGATGCAA	(AG)8	Chankaew et al. (2014)9
	VES0095	azuki bean	genic SSR	304	304	-	TATTCCCATCCCATTTCCAA	AGCGGAGTCCACCTTTTTCT	(AG)8	Chankaew et al. (2014)9
	VES0099	azuki bean	genic SSR	294	284	11	GCTGTGAATTGGAACACCCT	TGAATTCCCTTTGAGTTCACAC	(AT)11	Chankaew et al. (2014)9
	VES0101	azuki bean	STS	228	228	-	ACGAGGCTTTCTCACTCCAA	TCCGATTCTAGGCTCTCCAA	-	Chankaew et al. (2014)9
	VES0102	azuki bean	STS	209	209	-	GCACGAGGCTCTCTCTCTCT	TTTGGGAGGATTCTTGTTGC	-	Chankaew et al. (2014)9
	VES0105	azuki bean	genic SSR	412	412	-	ATCAATCCAATCCAGACCCA	TGAAAATCTCCCGGATCTTG	(AATG)4··(GGA)5	Chankaew et al. (2014)9
	VES0107	azuki bean	genic SSR	226	226	-	GGGCAGAATCCTGTGACAAT	AGTAAAGGAGGTGGGGGTTG	(AAAG)4	Chankaew et al. (2014)9
	VES0110	azuki bean	genic SSR	280	280	-	AACCCTACCGTCACGATGTC	GATGACGCCGTATTTGAGGT	(AAG)6	Chankaew et al. (2014)9
	VES0112	azuki bean	genic SSR	153	153	-	TGGACAGGATGCAGAGTGAG	CCTGAAGGTGGAAAGAGCAG	(AAC)6	Chankaew et al. (2014)9
	VES0115	azuki bean	genic SSR	278	278	-	GAAGCCAAAACCTTGTCCCT	GGTGTTGTGCCTTGGAAGAT	(AAG)7	Chankaew et al. (2014)9
	VES0116	azuki bean	genic SSR	280	280	-	TCTCTCAAATGGTGTGGGTG	ATTGATTGCAGCTTCAGCCT	(AAG)6	Chankaew et al. (2014)9
	VES0120	azuki bean	genic SSR	384	384	-	AATCCATCGCACCTTACACC	GGCTCGATGACAGGAAAGAG	(AAC)7	Chankaew et al. (2014)9
	VES0125	azuki bean	genic SSR	-	-	-	CGGTTGAAGGCCTGAAATTA	CAATGGAAGTGAGCAGAGCA	(ACT)5	Chankaew et al. (2014)9
	VES0127	azuki bean	genic SSR	409	409	-	CAACTGTTTCCCCTTTCCAA	AAGGAGCCGAGCAATGTAGA	(GGA)5	Chankaew et al. (2014)9
	VES0132	azuki bean	genic SSR	165	165	-	TGATGCAACATGGACCAACT	CAAAGGCAGAATTGGTGGTT	(ATC)5	Chankaew et al. (2014)9
	VES0133	azuki bean	genic SSR	282	282	-	TTGATTTGTTGGGCGTGTAA	AATCACACCTCGTTTGGAGC	(AAC)6	Chankaew et al. (2014)9
	VES0135	azuki bean	genic SSR	537	537	-	TCCGGGTTGCTTCTTGTAAC	CTGGGGCAACACACTCTTTT	(AAG)6	Chankaew et al. (2014)9
	VES0137	azuki bean	genic SSR	-	-	-	TTCTGTTGCATCTCCACAGG	ATGCTCTTGCAAAGTTGGCT	(AGC)6	Chankaew et al. (2014)9
	VES0138	azuki bean	genic SSR	237	237	-	TGAAACCATGAATGCTCCAA	TGATTGTGCTTGCTGAAAGG	(ATC)6···(AAC)5	Chankaew et al. (2014)9
	VES0141	azuki bean	genic SSR	222	222	-	CATCAGCACCAGCAACAACT	AGTAGGCCCAGAGTTCCCAT	(AAC)8	Chankaew et al. (2014)9
	VES0142	azuki bean	genic SSR	-	-	-	TCTCACACGCACAAACACAA	CCAGAGGAGAGTTGAGGCTG	(GGT)6···(GGT)6	Chankaew et al. (2014)9
	VES0144	azuki bean	genic SSR	416	416	-	TGAAGCTTTATTCGATGTTTCAA	TCGGCTAAAGGGTAAAGGGT	(AAG)7	Chankaew et al. (2014)9
	VES0147	azuki bean	genic SSR	232	232	-	TACCCCGGTTACTACCCTCC	TTATGGTAACGGCCTTCTGG	(ATC)6···(ATC)6	Chankaew et al. (2014)9
	VES0148	azuki bean	genic SSR	276	276	-	CCTTCTTCAGGATCTTCCCC	GAAAGGAAGCAGGGTGATTG	(ATC)6	Chankaew et al. (2014)9
	VES0149	azuki bean	genic SSR	-	-	-	TCATCAATGCATTACGCTGA	TGTGGGATAAACTCACCCCT	(AAC)5	Chankaew et al. (2014)9
	VES0151	azuki bean	genic SSR	388	388	-	CGTCCACGAAGAAGAGGAAG	GCTTTCTGAATATCGCGTCC	(AAG)6	Chankaew et al. (2014)9
	VES0154	azuki bean	genic SSR	182	182	-	GATCGCATAGAGCGTTGTGA	TCACTGTCAGTCCCGAGTTG	(AAC)5	Chankaew et al. (2014)9
	VES0155	azuki bean	genic SSR	-	-	-	ATGGTGGGGCCTTCTATTTT	GCAATCAATGTGCAACAACC	(AAT)7	Chankaew et al. (2014)9
	VES0156	azuki bean	genic SSR	182	182	-	ACCAAGCTCTACCCCGAGTT	AGGGGTTGAGGTTAGGGTTG	(GGC)5	Chankaew et al. (2014)9
	VES0159	azuki bean	STS	250	250	-	GCACGAGGCTTCTCTCAAAC	AAAGGGCAGAAAACCAAACA	-	Chankaew et al. (2014)9
	VES0160	azuki bean	genic SSR	295	295	-	CTGAAGCCATGGATTACGGT	TGTTAATGGGTGAGGGAGGA	(AAG)7	Chankaew et al. (2014)9
	VES0161	azuki bean	genic SSR	-	-	-	CACGAACACAGCGAACAAAT	GATGGGCCTGATGTGAAGTT	(GGT)10	Chankaew et al. (2014)9
	VES0162	azuki bean	genic SSR	191	191	-	CTGAAGTCCCGCTTGAAAAG	TGAAGCTCTGCACCATTTTG	(GGA)6	Chankaew et al. (2014)9
	VES0165	azuki bean	genic SSR	292	292	-	TCCAAAACATGAATTTGCCA	TTCAGCCTCCTTCGATATGC	(AGC)6	Chankaew et al. (2014)9
	VES0169	azuki bean	genic SSR	238	238	-	TCAAATCTCACTCACTCATTCTCA	ATTAGGGTGGTGAAGCCTCC	(ATC)8	Chankaew et al. (2014)9
	VES0172	azuki bean	genic SSR	222	222	-	AATCCTACCCTCCCGTTCTC	TTCAAAAGGGTCAACGGAAC	(GGT)6	Chankaew et al. (2014)9
	VES0180	azuki bean	genic SSR	145	145	-	TATTTCGGAGCTTTCTTCGC	AAAGGAAAATGGTTTTGGGG	(ATC)6	Chankaew et al. (2014)9
	VES0183	azuki bean	genic SSR	370	370	-	CTTCAACCTCCACACCGTCT	CACAAACAACATCGGCAAAC	(AGC)7	Chankaew et al. (2014)9
	VES0186	azuki bean	genic SSR	-	-	-	GTCCGCCATTCAGCATTACT	TGGAAAGACCTTCCCAAAAA	(AAG)5	Chankaew et al. (2014)9
	VES0190	azuki bean	genic SSR	394	394	-	ACCCTCCTAAAGCCTTGCAT	CATCATGAAACCTGCACCTG	(AAC)8···(GGT)6···(GGA)5	Chankaew et al. (2014)9
	VES0193	azuki bean	genic SSR	174	174	-	GAGGGGTTGTTGAATGGTTG	TTGGTGACTGATGATGCGAT	(AG)11	Chankaew et al. (2014)9
	VES0194	azuki bean	genic SSR	197	197	-	CAGATTTCGCAAAAATGGGT	AATATGGAGCACACCTTGCC	(AAC)7	Chankaew et al. (2014)9
	VES0195	azuki bean	genic SSR	152	152	-	GGCCACATTACGACCTTCTG	TCTCACAGTTGGGGTGATGA	(AAG)10	Chankaew et al. (2014)9
	VES0201	azuki bean	genic SSR	128	128	-	GGGGTAAGAGGAACACCCTT	ATAACGTGAAGCTGCGTCCT	(AAG)7	Chankaew et al. (2014)9
	VES0202	azuki bean	genic SSR	236	236	-	TCTAAGGAGCAAAGGCCAAA	GACGCAAAGAAACAGAAGGC	(AAAG)5	Chankaew et al. (2014)9
	VES0204	azuki bean	genic SSR	270	270	-	CACACCAACATTGCTTCACC	TCAGGATTTCCCGAAGAATG	(AG)10	Chankaew et al. (2014)9
	VES0206	azuki bean	STS	273	273	-	GAGGGCGGTTTTAGCTTTTT	TCCCGAACTAGCCTATCCCT	-	Chankaew et al. (2014)9
	VES0209	azuki bean	genic SSR	293	293	-	AAACATTTTATTCATAGCAGAAGAGC	CAACTGTTGTGGTCGATTGG	(AT)9	Chankaew et al. (2014)9
	VES0215	azuki bean	genic SSR	351	351	-	GGAATGGGGGAAAGAATGTT	TAGCATTCAGGGTGTGACCA	(AAC)6	Chankaew et al. (2014)9
	VES0219	azuki bean	genic SSR	290	290	-	CCACTGGCATGAACTTCCTT	AACCACCCATGGTTTTTGAA	(GGA)6	Chankaew et al. (2014)9
	VES0221	azuki bean	genic SSR	259	259	-	GTGCCTTTGGTCTCAACCAT	ACTCACATGTCCTTGCCTCC	(AAG)6	Chankaew et al. (2014)9
	VES0229	azuki bean	genic SSR	377	377	-	AAAAGCATGATCACTGCATGTATAG	TGAAGGTCTGGACTGGCTCT	(AAT)6	Chankaew et al. (2014)9
	VES0231	azuki bean	genic SSR	206	206	-	ATGGATCTCATGGGTCTGGA	TTCCCGTGTTTAAACTTGCC	(AGC)6	Chankaew et al. (2014)9
	VES0237	azuki bean	genic SSR	128	128	-	TTCCTCATCGTCGTCCTCTT	TTATTCCCCATGCTGTGTCA	(ATC)5	Chankaew et al. (2014)9
	VES0241	azuki bean	genic SSR	-	-	-	TTCTCTTCTGGCCACTCGTT	TCCTTATTGCCCTGCAATTC	(ATC)6	Chankaew et al. (2014)9
	VES0261	azuki bean	genic SSR	200	200	-	GGGTATGGTTATGGTGTGCC	TCCTCTTCATTTCTTGACCCA	(AGC)6	Chankaew et al. (2014)9
	VES0265	azuki bean	genic SSR	-	-	-	AAACTTCAGCGACACTGGCT	ACTTGGAACCACTTCATGGC	(ACG)6	Chankaew et al. (2014)9
	VES0266	azuki bean	genic SSR	154	154	-	TGGCTTCACTCACGTGTCTC	GCTGTTCGAGGAGATTTTGC	(AAG)6	Chankaew et al. (2014)9
	VES0269	azuki bean	genic SSR	-	-	-	GAAGCACAAGGAGTTGCCTC	CTTAGCCTTGGGCTTGACAG	(AGC)6···(GGT)5	Chankaew et al. (2014)9
	VES0278	azuki bean	genic SSR	302	302	-	CCAACTTTCCCAAGTTTCCA	TGTCCATACAGGGCATGAGA	(AGC)8	Chankaew et al. (2014)9
	VES0281	azuki bean	STS	-	-	-	ACGAGGGCACACAAGAGAAG	GTTTTTGGTGTGGCAGGTTT	-	Chankaew et al. (2014)9
	VES0283	azuki bean	genic SSR	279	279	-	GCCCAAACCAAAACCCTAAT	TTGTTGACGGTGTGGGAGTA	(AAT)7	Chankaew et al. (2014)9
	VES0287	azuki bean	genic SSR	207	209	3	ACCTTCACTCCCTCCATTCC	GTGTCCGTACATTGCTGGTG	(AG)8	Chankaew et al. (2014)9
	VES0293	azuki bean	genic SSR	232	232	-	ACCTGGTAGCAGAGCAGCAT	GGACCGGTTTCACTCAAAAA	(AG)8	Chankaew et al. (2014)9
	VES0295	azuki bean	genic SSR	-	-	-	TTTGTGCAGAAGGGTTTGTG	TCTCTCGCTTGAGAGTGCAA	(AG)8	Chankaew et al. (2014)9
	VES0298	azuki bean	genic SSR	-	-	-	GATCAGACCACCTTTCTCGG	AAACCAGGGGTATTGAAGGG	(AAAG)4	Chankaew et al. (2014)9
	VES0300	azuki bean	genic SSR	-	-	-	ACCAACACGTCCTTCTGCAT	CCATCCAACAATATCGACCC	(AAAG)4	Chankaew et al. (2014)9
	VES0302	azuki bean	genic SSR	-	-	-	TGCAGGGTTTGTCTGGAGAT	ACCATGGCATGTGCAAAATA	(GGGA)4	Chankaew et al. (2014)9
	VES0307	azuki bean	genic SSR	223	223	-	TTTTCCAAGAAAATTGGTTGC	TCCTGGTACGGCCTTCATTA	(AAAT)4	Chankaew et al. (2014)9
	VES0309	azuki bean	genic SSR	-	-	-	CAGCAAAAACAACAACTACAGCA	AAGAGCATGTTGGTGTTCCC	(AAAC)4	Chankaew et al. (2014)9
	VES0310	azuki bean	genic SSR	-	-	-	TCCAGGATTGTTTGATGGAAG	CATCTCCCCCGGTAAAGACT	(AAAT)4	Chankaew et al. (2014)9
	VES0313	azuki bean	genic SSR	250	250	-	AAATGGCCACCAAAACACTC	CAGTGGGGAGCTGGTAACAT	(AG)8	Chankaew et al. (2014)9
	VES0318	azuki bean	genic SSR	177	177	-	TTTATGACCCCGTGCCTTAC	TGGGAGAGCAAGCAGGTAGT	(AAAG)4	Chankaew et al. (2014)9
	VES0321	azuki bean	genic SSR	135	135	-	GGTCATCCGTGGAAGTGA	TTAATCCTCCCTCGTGTTGG	(AAAT)4	Chankaew et al. (2014)9
	VES0323	azuki bean	genic SSR	-	-	-	TGGGTATGAACCTTTCTATGGC	GCCTGGATAATAGCTGCCTG	(AAAT)4	Chankaew et al. (2014)9
	VES0326	azuki bean	genic SSR	291	291	-	TTTAACCCCAACGGAATCAA	CCGGTAATCCTGCTGAAGAA	(AAAG)4	Chankaew et al. (2014)9
	VES0327	azuki bean	genic SSR	-	-	-	GAATTTTGAAGTGCTTTTCCTCA	TCGTGTACCTTTCCCTCGAC	(AAAG)4	Chankaew et al. (2014)9
	VES0333	azuki bean	genic SSR	-	-	-	GTCTCCTCTCCAACCCAACA	GGCAAAGGTGGTGAAGATGT	(AG)8	Chankaew et al. (2014)9
	VES0335	azuki bean	genic SSR	218	218	-	AGCAACCTAATCTCACAGGCA	TGCTGGACCAGATGACAGAG	(AT)8	Chankaew et al. (2014)9
	VES0336	azuki bean	genic SSR	-	-	-	TCAATCCAACACCCAGTCAA	CTATCTCGGTTTGGACTCGC	(AT)10	Chankaew et al. (2014)9
	VES0342	azuki bean	genic SSR	302	302	-	CACACTGAACAACCGGAATG	CGTCTGTGGACCATTTCCTT	(AAAC)4	Chankaew et al. (2014)9
	VES0349	azuki bean	genic SSR	-	-	-	AGGCATGAGTAAGCCAATGC	TGCAATTATCAAGGCTAGAAAGC	(AGC)5	Chankaew et al. (2014)9
	VES0351	azuki bean	genic SSR	219	219	-	GCATCCCTTCATGACCACTT	GGCTCAAACCAGGTGGAATA	(GGA)5···(AAG)5	Chankaew et al. (2014)9
	VES0357	azuki bean	genic SSR	301	301	-	AATTCCAAACGCCAGATTCA	GCAGTTTCGATGGTGGATTT	(AAG)5	Chankaew et al. (2014)9
	VES0361	azuki bean	genic SSR	355	355	-	ATTTTCAAGCCAAAGACCCC	TTGCATCAAGGCCTAAGCTC	(ATC)5	Chankaew et al. (2014)9
	VES0379	azuki bean	genic SSR	210	210	-	CCATGCCTTTGCCAATATCT	TCTCTTGCCAGAACACTTGG	(ATC)5	Chankaew et al. (2014)9
	VES0382	azuki bean	genic SSR	213	213	-	TTCCGACCGTTTCGTTTTAC	TCCGACAAACCCATTAGCTC	(AAG)5	Chankaew et al. (2014)9
	VES0384	azuki bean	genic SSR	-	-	-	TTCAATCGACTCCCTCCATC	TGGACTCAGCATTGACGAAG	(ATC)5	Chankaew et al. (2014)9
	VES0385	azuki bean	genic SSR	254	254	-	CTCCTACCACCACCACCACT	TGTCTTTGCCACTGAGTTCG	(AAC)5	Chankaew et al. (2014)9
	VES0386	azuki bean	genic SSR	296	266	11	GTACCAACTCCTTCCCCTCC	GGAGGAGGAGGGTAAACCAC	(GGT)5	Chankaew et al. (2014)9
	VES0390	azuki bean	genic SSR	-	-	-	TCCTCCCACCAAGAATGAAG	GTTCTTGATTACGCTCCCCA	(GGA)5	Chankaew et al. (2014)9
	VES0392	azuki bean	genic SSR	-	-	-	CAAAGAAGGATTCCGCAGAG	CCACCAAACTGCTCCTCAAT	(AGC)5	Chankaew et al. (2014)9
	VES0398	azuki bean	genic SSR	-	-	-	GTCCCCAAATCCTCCTCTTC	TGCAACAGCAAAAACCTCAG	(GGA)5···(AAG)5	Chankaew et al. (2014)9
	VES0401	azuki bean	genic SSR	-	-	-	GGCCAAATTCAGACTCCAAA	TCTGGTCCTGCGCTGAAT	(AAG)5	Chankaew et al. (2014)9
	VES0405	azuki bean	genic SSR	-	-	-	AAGTTCTGGTGGTGGATTCG	GCATGCTCTGGGTCTTTCTC	(AAG)5	Chankaew et al. (2014)9
	VES0406	azuki bean	genic SSR	135	135	-	CACGAGGGGTTATTGGAAAG	CGAGACACACACGGATGAAG	(AAT)5	Chankaew et al. (2014)9
	VES0408	azuki bean	genic SSR	446	446	-	TGAGCACACAGATGTCCCTC	TTCCAACCACATAGCAACCA	(AGC)5	Chankaew et al. (2014)9
	VES0411	azuki bean	genic SSR	238	238	-	TGAGAGTAGGATTCACCGCC	GGGTGCTGGCAGTTGTAGAT	(AAG)5	Chankaew et al. (2014)9
	VES0412	azuki bean	genic SSR	139	139	-	TGGGAGGTGTTTCTGTTTCC	CGGTTTTCACAGAAGGGTGT	(ATC)8	Chankaew et al. (2014)9
	VES0415	azuki bean	genic SSR	-	-	-	GGCGATCGGAACAGGTATAA	TGGCAACAGAGCATAACACA	(ACT)5	Chankaew et al. (2014)9
	VES0416	azuki bean	genic SSR	-	-	-	TCGTTCAAAGGTGTGTCCAA	TGGCTAACGGCTGCTTTAGT	(AAG)5	Chankaew et al. (2014)9
	VES0420	azuki bean	genic SSR	135	135	-	CTGTTCTTGCTGATGCCAAA	GGCAGATCAAGGTCTCTTGC	(GGT)5	Chankaew et al. (2014)9
	VES0427	azuki bean	genic SSR	305	305	-	CTTGCAAATTCCAGGGTGAC	ACCCAGAAACAGGCCTTAGC	(AAC)5	Chankaew et al. (2014)9
	VES0429	azuki bean	genic SSR	-	-	-	CCACGAAGTCCTTTCACGAT	CATACAACATAGCCGTAGCGA	(ATC)5	Chankaew et al. (2014)9
	VES0431	azuki bean	genic SSR	297	297	-	AGCTCTCTTAGCAGCATCGC	CTCACTGTGGTTGGAACACG	(GGT)5	Chankaew et al. (2014)9
	VES0435	azuki bean	genic SSR	281	281	-	ATTGCCCCAATCAGAGTGAC	TCTGCCTCATCTTTGCCTTT	(GGT)5	Chankaew et al. (2014)9
	VES0436	azuki bean	genic SSR	207	207	-	GATTTAGGGGTGGTAGGGGA	ATGCGGCTGAACTACGACTT	(GGT)5	Chankaew et al. (2014)9
	VES0439	azuki bean	genic SSR	284	284	-	AACTTGAGTGTGTCTGGGGG	TGCTTTGCAGAACAGATTGG	(AGC)5···(AAC)7	Chankaew et al. (2014)9
	VES0442	azuki bean	genic SSR	-	-	-	CCAATTAAGCCATGTCCGTT	TCACAAAGCTCGCCTAGACA	(GGA)5	Chankaew et al. (2014)9
	VES0443	azuki bean	genic SSR	166	166	-	GGTCGTGGTCCTGTCAAGTT	CACATCACATGGATGGTTTGA	(ACT)5	Chankaew et al. (2014)9
	VES0446	azuki bean	STS	-	-	-	GCACGAGGATTCCGTTTTAT	CATCTTCGTCGCTCTTCACA	-	Chankaew et al. (2014)9
	VES0458	azuki bean	genic SSR	-	-	-	AAGCTTCACGAGGCTTTCAA	CCATCATCACCATCAAGCAG	(AAG)5	Chankaew et al. (2014)9
	VES0460	azuki bean	genic SSR	-	-	-	CCAAACCCAACAAGAGGAAA	GATCTGAAAAACGCGTCCAT	(ACG)5	Chankaew et al. (2014)9
	VES0468	azuki bean	genic SSR	243	243	-	TCGACATCCCCTTTCTTGAC	TCTTCTGAAAGAGCGTGGGT	(GGT)5	Chankaew et al. (2014)9
	VES0472	azuki bean	genic SSR	365	365	-	CCTCTCTTTAGGGTTTCGGG	CAAATCCTCGTTTCCTCCAA	(AAG)5	Chankaew et al. (2014)9
	VES0473	azuki bean	genic SSR	534	534	-	GAGAAGCAGAGAGAAGCGGA	AAGTCGAGAATTGCCCTTGA	(AAG)5	Chankaew et al. (2014)9
	VES0476	azuki bean	STS	304	304	-	ACGAGGATTCACTCCACACC	TTCAACATCAGCTTGTTCCG	-	Chankaew et al. (2014)9
	VES0478	azuki bean	genic SSR	-	-	-	AGGCTCTCCTTCTCCCTCAC	CGGGTAAGTCATCCCTTTGA	(GGT)5	Chankaew et al. (2014)9
	VES0484	azuki bean	genic SSR	-	-	-	TCAGATCCTTGACGAATCCC	CGCAGGTACTCCGTGAATTT	(AAG)5	Chankaew et al. (2014)9
	VES0490	azuki bean	genic SSR	-	-	-	GAATCCAAACACCATGACCC	TTTCCTCTCCTCGGCTTGTA	(GGA)5	Chankaew et al. (2014)9
	VES0493	azuki bean	genic SSR	-	-	-	ATAATCATCACAGCCGCCAT	TCGTCTGCAACTCCTTCCTT	(GGA)5···(GGA)5	Chankaew et al. (2014)9
	VES0502	azuki bean	genic SSR	247	247	-	TTGATTCTTTAAGCGCCACA	AGAGTCGGGATTGTCCCTTT	(AAG)5	Chankaew et al. (2014)9
	VES0503	azuki bean	genic SSR	160	160	-	CGCTTTTGTAGGATTGGAACA	TGAAGGATGAGGGGAAGATG	(AAG)5	Chankaew et al. (2014)9
	VES0507	azuki bean	genic SSR	221	221	-	GTTTTGCCCCAACACTCAAC	AGGTTGTGCGGAAGAGAAGA	(AAG)7···(GGA)5	Chankaew et al. (2014)9
	VES0508	azuki bean	genic SSR	-	-	-	ATGGGAAAAGAGTTGGCAGA	AACTCAGCCCCAGCATACAC	(AAG)5	Chankaew et al. (2014)9
	VES0510	azuki bean	STS	300	300	-	CGAGGGTTCTCTCTCTACCTTG	ATGGAGTTGGTGAAGGTTGC	-	Chankaew et al. (2014)9
	VES0512	azuki bean	genic SSR	228	228	-	TCCAATTGAAGAAATTCGCC	ACGGAACAAGCTCATCATCC	(ATC)7	Chankaew et al. (2014)9
	VES0513	azuki bean	genic SSR	442	442	-	TCCCCTGAAAAGGAGGTCTT	GATGCTGGAAACCCTTTGAA	(GGT)5	Chankaew et al. (2014)9
	VES0515	azuki bean	genic SSR	171	171	-	GTCCACCTAGCCCATCTTCA	AGACTCAGAGACCAGACCTTCC	(AAT)5	Chankaew et al. (2014)9
	VES0519	azuki bean	genic SSR	410	410	-	AAAGGTCGGTTGAGAACCCT	GAGGAATTCGAAACGTCATGT	(AAT)5	Chankaew et al. (2014)9
	VES0520	azuki bean	genic SSR	295	295	-	TGCAAGAGTCAACAATTCCTT	AGCAGTAGTGGTGGTGACCC	(AAT)5	Chankaew et al. (2014)9
	VES0535	azuki bean	genic SSR	-	-	-	CAAGAACATTGGTGCCCTTT	CGAAGGGAATGCTTGTGAAT	(AAG)5	Chankaew et al. (2014)9
	VES0536	azuki bean	genic SSR	427	427	-	CCGTCAAGGAACATGGATCT	CTCATGGCAAAAGCCTCTTC	(AGC)5	Chankaew et al. (2014)9
	VES0539	azuki bean	genic SSR	-	-	-	CCCAGATCGCTTTTCTTCAG	CCTTCAATATCCCCTCCCAT	(GGA)5	Chankaew et al. (2014)9
	VES0540	azuki bean	genic SSR	-	-	-	TCCATTCTTCGAACTCGCTT	CGCTTAACTGACGTGAACCA	(GGT)5	Chankaew et al. (2014)9
	VES0546	azuki bean	genic SSR	-	-	-	ACCTTCCAAATCCACCATCA	TGATCTTGAGCGATGAAACG	(AGC)5	Chankaew et al. (2014)9
	VES0547	azuki bean	genic SSR	396	396	-	ACTTTGCTGGTGCCACTCTT	GCTTCAGGGCTGTTGGAGTA	(AAC)5	Chankaew et al. (2014)9
	VES0551	azuki bean	genic SSR	286	286	-	TCTGGCAAAAAGAAGCACAA	TCATCTGCATCTGAACCAGC	(ATC)5	Chankaew et al. (2014)9
	VES0553	azuki bean	genic SSR	272	272	-	GGGAAGTGAGTATGAGGCCA	AGTTCTCTGGGTCCTCAGCA	(AAG)5	Chankaew et al. (2014)9
	VES0555	azuki bean	genic SSR	243	243	-	CTTCCTGATTCCCCTTGTCA	AGACGAATGCCAATTTGACC	(AAC)7	Chankaew et al. (2014)9
	VES0558	azuki bean	genic SSR	444	444	-	GTCAAAGAAGCTCCCAGTGC	TGACCTGTTTCTCTGCCCTT	(AGC)5	Chankaew et al. (2014)9
	VES0563	azuki bean	genic SSR	-	-	-	TGGCGATGATAGTGAAGACG	CATCACTGTCAGCATCCTCC	(ATC)11	Chankaew et al. (2014)9
	VES0564	azuki bean	STS	-	-	-	CGAGGCATCTTTGTTCCTTC	TTGATCTTGTGAGTTCCCCC	-	Chankaew et al. (2014)9
	VES0572	azuki bean	genic SSR	266	266	-	TACTGTCAGGCGTGATGCTC	AAACTCCATGTTTTGGGCAG	(AGC)5	Chankaew et al. (2014)9
	VES0574	azuki bean	STS	-	-	-	GGCTTCATCTGGGTATTGCT	AAGTTCTTCGTGCAGCCTGT	-	Chankaew et al. (2014)9
	VES0577	azuki bean	genic SSR	246	246	-	TTTCCTCACCTTTTGCCAAC	CTCCCTGTGACCAACGAAAT	(ACT)5	Chankaew et al. (2014)9
	VES0578	azuki bean	genic SSR	232	232	-	CTGATGGCAACAATAGGGGT	GAGCTGCCAGTTGTTGTTGA	(AAG)5	Chankaew et al. (2014)9
	VES0583	azuki bean	genic SSR	-	-	-	TCAGTGGAGAAGGAGGTTGG	CTCTCCAGTTGGTGCAGTGA	(GGT)5	Chankaew et al. (2014)9
	VES0586	azuki bean	genic SSR	232	232	-	CATGCCAATCTTTCTGCGTA	ACGTTCATGGCTTCCATTTC	(AAG)5	Chankaew et al. (2014)9
	VES0589	azuki bean	genic SSR	315	315	-	TGGTGTTGGTTGCTCCATAA	AAGCATTTTCCATCACACCC	(AAG)5	Chankaew et al. (2014)9
	VES0592	azuki bean	genic SSR	175	177	5	TTCCAGTGGGTTTTCTGGAC	CATTGCAGCACTTTGAGCAT	(ATC)5	Chankaew et al. (2014)9
	VES0594	azuki bean	genic SSR	-	-	-	ATCCACAACGAAAGAGACCG	CAGCTCGAAGATGGAAGGAC	(AAG)5	Chankaew et al. (2014)9
	VES0599	azuki bean	STS	-	-	-	CACGAGGTGGTCGGATTACT	CAGGGTAACCAACCCTGAAA	-	Chankaew et al. (2014)9
	VES0604	azuki bean	STS	332	446	3	GCACGAGGCTTACCTTAAAA	TCATTGCAGAAGATGCGAAG	-	Chankaew et al. (2014)9
	VES0607	azuki bean	genic SSR	404	404	-	GGGCAGAGTGTTTGGTGATT	TCTGACAGTTCGCCTGATTG	(ATC)5	Chankaew et al. (2014)9
	VES0610	azuki bean	genic SSR	307	307	-	CAGCTCTCTTTCCCATTTCG	GCGGTTGGAATTCAACACTT	(ATC)5	Chankaew et al. (2014)9
	VES0612	azuki bean	genic SSR	398	398	-	CTTTCCACCTTTCTTCACGG	ACAGCGATGAGGAGGATGAC	(ATC)5	Chankaew et al. (2014)9
	VES0616	azuki bean	genic SSR	-	-	-	CATCAACACACATGCCAACA	TCACATAAACCCTCCAACCC	(AAG)5···(AAAT)4···(AG)13	Chankaew et al. (2014)9
	VES0618	azuki bean	genic SSR	-	-	-	CAAAGGTGAGGCCAGAAGAG	GGTGAGCACAGTTGCAAGAA	(AAG)5	Chankaew et al. (2014)9
	VES0619	azuki bean	genic SSR	168	168	-	TTCACTCACCAACCCATTCA	GATTTGAAGCGCAAATGGTT	(AAG)5	Chankaew et al. (2014)9
	VES0624	azuki bean	genic SSR	267	267	-	CAAAACCTGTCGGCAAAAAT	ATTTCACCTCCTCCCTTCGT	(AAC)5	Chankaew et al. (2014)9
	VES0630	azuki bean	genic SSR	-	-	-	CCACCCATGAAACATCCATT	GGGGTTTGTCTTTGTGAAGG	(AAC)5	Chankaew et al. (2014)9
	VES0635	azuki bean	genic SSR	368	368	-	CTTTCCAAACCCTAGCAGCA	TCCTTCCACTGGTTTCCATC	(GGA)5	Chankaew et al. (2014)9
	VES0643	azuki bean	genic SSR	533	533	-	TTGGGCTCACACCTCTAACC	TCTTACCCGGTTGATGGAAG	(ATC)5	Chankaew et al. (2014)9
	VES0652	azuki bean	genic SSR	-	-	-	ATCGTCGATGTGTGACGTGT	GGTATGGCAGAGGACAAGG	(GGC)5	Chankaew et al. (2014)9
	VES0657	azuki bean	genic SSR	143	143	-	TGTCACAACACACATGAAAGGA	GAGCAAATGGGAGGACAAGA	(AAT)26	Chankaew et al. (2014)9
	VES0659	azuki bean	genic SSR	-	-	-	TTGGTCGATTCTCCCTCTTC	TTCACGTTTGAGTCCTGCTG	(AG)35	Chankaew et al. (2014)9
	VES0660	azuki bean	genic SSR	170	166	3	ATGTGAATCCATCCCTGCTC	AGCCATGGCAAAGAGAGAAA	(AG)23	Chankaew et al. (2014)9
	VES0661	azuki bean	genic SSR	240	240	-	GTGAATGCCAAAAAGGTCGT	ACCTGATTCTGTTGCCATCC	(ACT)5···(AT)20	Chankaew et al. (2014)9
	VES0662	azuki bean	genic SSR	-	-	-	ATTACGCAACCACACAACGA	AGCATCGTCAGTGGTGACAG	(AAT)15	Chankaew et al. (2014)9
	VES0663	azuki bean	genic SSR	274	274	-	TTCGTTTTCATCCGGAAAAG	TAGTCTTTGGCCTTGGTTGG	(AG)22	Chankaew et al. (2014)9
	VES0664	azuki bean	genic SSR	-	-	-	AGCCAAGTGTCGTGCTTACA	TTGCATGCCAAGTTCAAAAG	(AAT)15	Chankaew et al. (2014)9
	VES0665	azuki bean	genic SSR	200	200	-	CGATGCAATAGCCGAAGATT	CGAATCATCTCACCGACAGA	(ATC)10	Chankaew et al. (2014)9
	VES0669	azuki bean	STS	241	241	-	GCACGAGGTCTCTCTCTCCA	CGCAACAGAAAAAGGGGTTA	-	Chankaew et al. (2014)9
	VES0670	azuki bean	genic SSR	101	101	-	ACTTGGAACTCCCAAAGCCT	CTCGGGCACTTCAAAGACTC	(AGC)10	Chankaew et al. (2014)9
	VES0671	azuki bean	genic SSR	277	277	-	GCAGACCTACACTGGAAGGC	AGCAAGGATTCCATTTGCTG	(AT)14	Chankaew et al. (2014)9
	VES0675	azuki bean	genic SSR	314	311	4	CATCACTCTGCTGACCCAGA	TCTCCACCACAAACCTACCC	(AAG)5···(AAG)8	Chankaew et al. (2014)9
	VES0676	azuki bean	genic SSR	238	238	-	GCACATATACCCACCCTGCT	TGGTGTAAGGCTTCCTCACC	(AG)13	Chankaew et al. (2014)9
	VES0678	azuki bean	genic SSR	304	304	-	TGCTGAGAAGTGCAAGGAGA	TGTCACGCCTCTTCCTCTTT	(GGT)7	Chankaew et al. (2014)9
	VES0679	azuki bean	genic SSR	377	377	-	CGACTTCGGCATACACATTG	CCGAAGATTAGTTTCCAGCG	(AC)11	Chankaew et al. (2014)9
	VES0680	azuki bean	genic SSR	195	195	-	TGATGTTACAATGCCAGCAGA	ACAACAAGGGCACCAACAAT	(AT)11	Chankaew et al. (2014)9
	VES0686	azuki bean	genic SSR	-	-	-	TAATCAGGCTAAAAGGCCCC	CGTTGCAACATAAGACGGTG	(AAT)7	Chankaew et al. (2014)9
	VES0693	azuki bean	genic SSR	-	-	-	CAAAACCCTCACTCCCAAAA	TTCACCTCTCCATCCGAATC	(GGA)7	Chankaew et al. (2014)9
	VES0695	azuki bean	genic SSR	-	-	-	AGCTTGAATGCTCTTCAGGG	GGGATGATTGGAATGGTGTC	(ATC)10	Chankaew et al. (2014)9
	VES0699	azuki bean	genic SSR	232	232	-	TTGAGCACAACCACCATTTG	TTGACATTGAAAGCAACCCA	(ATC)7	Chankaew et al. (2014)9
	VES0700	azuki bean	genic SSR	-	-	-	TTGGGCCAATCATCACTACA	CCTGGAAGAACCTCCCAACT	(AAG)5···(AAG)6···(AAC)7···(AAC)6	Chankaew et al. (2014)9
	VES0705	azuki bean	genic SSR	333	327	3	CCCGTAGAGAAATAGGGGGA	GCAGATGGTAGCATGAGCAA	(AAAT)7	Chankaew et al. (2014)9
	VES0708	azuki bean	genic SSR	-	-	-	ATCACCAATCTGTGCCCTTC	AAGATTTGGCCGAGGAACTT	(ATC)21	Chankaew et al. (2014)9
	VES0713	azuki bean	genic SSR	-	-	-	TGACACCTTCCAAATCCCTC	AAAACGGTTCTCTCCCAGAAA	(AG)12	Chankaew et al. (2014)9
	VES0717	azuki bean	genic SSR	-	-	-	AAGACCACCTTGGCAGTGAC	TTATTTGAAGGCAACCCGAC	(AAG)12	Chankaew et al. (2014)9
	VES0718	azuki bean	STS	-	-	-	CACGAGGGCACTCTTTTCAG	TGGGGTCTGTGTGTTTTGAG	-	Chankaew et al. (2014)9
	VES0719	azuki bean	genic SSR	174	174	-	GATAGTAAGGCCCCACTCCG	GGCCGAACCACAAAAGACTA	(AAC)8	Chankaew et al. (2014)9
	VES0721	azuki bean	genic SSR	190	190	-	CCCCACTCCCACCACTATTA	ATTGGAAGGGTTTGTTGCTG	(GGT)10	Chankaew et al. (2014)9
	VES0724	azuki bean	genic SSR	-	-	-	GGTGGGTAACCCTTCATGTG	GAAAAGGGTGTGATGGTTGG	(GGGT)4···(AC)11···(AT)17	Chankaew et al. (2014)9
	VES0727	azuki bean	STS	-	-	-	GCACGAGGCTAACACCTTCT	ATTGCAGTACCAGCATTCCC	-	Chankaew et al. (2014)9
	VES0728	azuki bean	genic SSR	-	-	-	GTCATCGTCGGAGTCATCCT	CAAGTGCAGCAAATCGTGTT	(GGC)6	Chankaew et al. (2014)9
	VES0735	azuki bean	genic SSR	-	-	-	TCCTCATCTCATCAAACGCA	AGTTTTGCCACTCTTCGTGG	(AG)10	Chankaew et al. (2014)9
	VES0736	azuki bean	genic SSR	261	261	-	GCCCTCACACACATCACAAC	GAAGAAGAAAACGCAGACGC	(AAAG)5···(AAG)9	Chankaew et al. (2014)9
	VES0737	azuki bean	genic SSR	205	205	-	TTTCCCTATTGCAGGCTTTG	AAGGAAAGGGACTGGGAGAA	(AAAG)6	Chankaew et al. (2014)9
	VES0740	azuki bean	genic SSR	137	147	7	AATCCTCCGAAGAAGGGTGT	CACTCGGAAGTCAGGTCCAT	(ATC)7	Chankaew et al. (2014)9
	VES0743	azuki bean	genic SSR	-	-	-	GCATCGATGATGGTTGTGAT	TTTGCAAGCTCCAATCAATG	(AAT)6	Chankaew et al. (2014)9
	VES0744	azuki bean	genic SSR	226	226	-	CCAGAAAGTCGAGAGCGAAC	TCTTCGCGAATGATGTCTTG	(AGC)6	Chankaew et al. (2014)9
	VES0748	azuki bean	genic SSR	-	-	-	CTCCAATCTCCCAGAATCCA	CTTAGCGAGAGGTGTGGAGG	(AAG)5	Chankaew et al. (2014)9
	VES0749	azuki bean	genic SSR	218	227	3	TGGAATGTCCAAACAAACCT	AAGCTTTCAACAAGCCTGGA	(AAT)11	Chankaew et al. (2014)9
	VES0750	azuki bean	genic SSR	-	-	-	GCCGAAAGGCATCAAGTAAA	ACCTACCATGGCTTTCATGC	(AAC)6	Chankaew et al. (2014)9
	VES0762	azuki bean	genic SSR	245	245	-	CTTCCACCTTCGACGTTTTC	TTTCGGAGCCATTTTCATTC	(GGC)6	Chankaew et al. (2014)9
	VES0765	azuki bean	genic SSR	307	307	-	TCAAACCAGAAAAGGCCAAC	GGAAATCGTGGTAGAGAGCG	(GGA)7	Chankaew et al. (2014)9
	VES0767	azuki bean	genic SSR	-	-	-	AAGCAGCGAGAATTTGCATT	AGGCCTCACTCTCTTCCACA	(AAG)9	Chankaew et al. (2014)9
	VES0775	azuki bean	genic SSR	-	-	-	CCATTCCATGGCTTGTCTTT	AACCTGCTGCTTTCTGCTTC	(GGA)7	Chankaew et al. (2014)9
	VES0777	azuki bean	genic SSR	-	-	-	GTCATCGCAACAATGGAAGA	GGAGAAGATAGGGGTTGGGA	(GGT)6	Chankaew et al. (2014)9
	VES0784	azuki bean	genic SSR	222	222	-	GCCCGAACCTCACAAAACTA	GTGAAGGGGGAGTGATTGAA	(AAG)9	Chankaew et al. (2014)9
	VES0787	azuki bean	genic SSR	-	-	-	ATGGACATCACCAGACGACA	AGCTCCTCCAGTGACCAAGA	(AAC)5	Chankaew et al. (2014)9
	VES0790	azuki bean	genic SSR	-	-	-	GAGTGTTGCAAGCAGAGGCT	GGGTCTTTCCATGAGCTTGA	(ATC)8	Chankaew et al. (2014)9
	VES0793	azuki bean	genic SSR	155	147	9	CCTCCCCTGAAAACAAAACA	GAGGAGGAGCTCTTGACCCT	(AT)11	Chankaew et al. (2014)9
	VES0803	azuki bean	genic SSR	332	333	1	TGGGGATGAAATGGCTAAAG	AACGGAAGTGGGTTGACAAG	(AGC)11	Chankaew et al. (2014)9
	VES0810	azuki bean	STS	-	-	-	GCACGAGGCCCTGATATTT	TACACGATCCCAGATGCAAA	-	Chankaew et al. (2014)9
	VES0812	azuki bean	genic SSR	-	-	-	GGTACCTGGAGGAAGCACAG	TTGGAGCTGCTACTCCCACT	(AAAG)5	Chankaew et al. (2014)9
	VES0816	azuki bean	genic SSR	164	164	-	CATTCCGCATTACCACCTTT	GAACCTCTCACCTTCAACGC	(AAG)6···(AAAG)4	Chankaew et al. (2014)9
	VES0817	azuki bean	genic SSR	169	169	-	GTCCTAGTGGGTTCACTCGC	CGGTCACTGACTCACTCCAA	(ACG)6	Chankaew et al. (2014)9
	VES0827	azuki bean	STS	336	336	-	GAGGGATAGGCCTGAGAAGAA	GCCTTAGCCGAGACAATCTG	-	Chankaew et al. (2014)9
	VES0830	azuki bean	genic SSR	257	257	-	ACGCCATAAACGAAAACCAC	CTCCGGCGAAGAGTTATCAG	(AAC)6	Chankaew et al. (2014)9
	VES0833	azuki bean	genic SSR	-	-	-	TCATTCTCTTAGCCTCGCGT	CGAGAAGTTGCTTCACTCCC	(AAG)6	Chankaew et al. (2014)9
	VES0834	azuki bean	genic SSR	311	311	-	GGAAGCCGTTTGCTTGATTA	GTTGCGATTGGTACGAGGTT	(AAC)6	Chankaew et al. (2014)9
	VES0837	azuki bean	genic SSR	-	-	-	TATGGCCATTAAGTCGGGAA	GGTACGTGGGTGAGGGTATG	(GGA)6	Chankaew et al. (2014)9
	VES0839	azuki bean	genic SSR	188	188	-	GCAATCAGCACCTCTCAACA	CATCACTGTACCCTCCACCA	(ATC)6	Chankaew et al. (2014)9
	VES0842	azuki bean	genic SSR	365	365	-	GGGAAAAGGTGGAATGGAAT	GAGGCCATTGATGAGGAAGA	(AAG)6	Chankaew et al. (2014)9
	VES0844	azuki bean	genic SSR	499	499	-	CGCCTTTCCCTTCTCTGACT	GATCTCACAAATGCTCCGGT	(ACT)6	Chankaew et al. (2014)9
	VES0854	azuki bean	genic SSR	-	-	-	TCCATCTGTGCCTCTTCCTC	GTTCTCAATCTCCCCGATCA	(GGT)6	Chankaew et al. (2014)9
	VES0855	azuki bean	genic SSR	294	294	-	GGGCACAATTAATTCGCTTG	TGAGGAGAAGCGTGACAAAA	(AAC)9	Chankaew et al. (2014)9
	VES0862	azuki bean	genic SSR	316	316	-	ACAAGCTCCGATGTACCGTC	CGGCGGTGTGATCCTATATT	(GGC)6	Chankaew et al. (2014)9
	VES0863	azuki bean	genic SSR	-	-	-	TCAACCAAAACCGACACAAA	TCAATCAAAATCCAAACCCAA	(AAT)6	Chankaew et al. (2014)9
	VES0868	azuki bean	genic SSR	-	-	-	TGAAATCGCTTCTTGACCCT	GCGTTTCATCGGAAGAGTGT	(AAG)6	Chankaew et al. (2014)9
	VES0869	azuki bean	genic SSR	283	283	-	GATGTCGCGTTTTCCAGAAT	AACTGGGTTGGTCTGGAGTG	(AT)9	Chankaew et al. (2014)9
	VES0870	azuki bean	genic SSR	-	-	-	AATCGCTCTCTTTATCCGCC	TGCTTCTTGGACTTTCGGAT	(AAT)6	Chankaew et al. (2014)9
	VES0881	azuki bean	genic SSR	204	204	-	GCACCCAGAGTTGTTGGAAT	TGGTGTCTTGCGTTGGAATA	(AATG)4	Chankaew et al. (2014)9
	VES0882	azuki bean	genic SSR	162	162	-	GGTTGGTTTGACTCCAGCAT	GGCGACTGAAGAAAGCAAAC	(AAAG)4	Chankaew et al. (2014)9
	VES0883	azuki bean	genic SSR	296	296	-	GTGGTTCACTTGGCAGGATT	CTGAGCTTTTCAACCGGAAG	(AATT)4	Chankaew et al. (2014)9
	VES0886	azuki bean	STS	451	451	-	GAAGCTTGTGATTCCGTGGT	CGATAAGTGGTACGCCAGGT	-	Chankaew et al. (2014)9
	VES0890	azuki bean	STS	231	231	-	GGCACGAGGTCTCTCTCTTC	CTCACATGCTGTTGCTAGGC	-	Chankaew et al. (2014)9
	VES0892	azuki bean	genic SSR	254	254	-	CTCCAACATCAGAATTGGCA	TGGATCAAGAAGAGGGGTTG	(AT)8	Chankaew et al. (2014)9
	VES0894	azuki bean	genic SSR	298	298	-	TATGCCTTCAAGGTGCACTG	TTTACCAGTAGCCTTAGAACGAG	(AAAC)4	Chankaew et al. (2014)9
	VES0897	azuki bean	genic SSR	-	-	-	CAGTCTCGTGCAGTTGGAAA	AGAAAGGGCCGAAGAAAGAG	(AG)8	Chankaew et al. (2014)9
	VES0901	azuki bean	genic SSR	233	233	-	GGCCTCTTGGAGTCACACAT	CACAGATGCAGCACCCATAC	(AT)8	Chankaew et al. (2014)9
	VES0904	azuki bean	STS	137	137	-	GGAAAGAGAAGCCAAGGGAG	GGAAGCCCATGTCTGAGTGT	-	Chankaew et al. (2014)9
	VES0906	azuki bean	genic SSR	-	-	-	GTCACAAACTCTGCAGCCAA	AAAATCCGGTTAGGATTGGG	(AAAC)4	Chankaew et al. (2014)9
	VES0907	azuki bean	genic SSR	425	425	-	TTTCTCACTGCCCATTCTCC	TTTACGGGGGAGTTTTGTTG	(AAAG)4	Chankaew et al. (2014)9
	VES0910	azuki bean	genic SSR	327	327	-	TGCTTTCATACTTCTGCCCC	CCCTGACACCAGGAAGTGAT	(AT)8	Chankaew et al. (2014)9
	VES0911	azuki bean	genic SSR	439	439	-	TTTTCCGACATGCATAAACG	TTAACTTTGGCCTTGCATCC	(AATG)4	Chankaew et al. (2014)9
	VES0912	azuki bean	genic SSR	451	451	-	AAGGTCCCAGATGGGCTAGT	TGGTGGTAATTCTGCTTCCC	(AATG)4	Chankaew et al. (2014)9
	VES0916	azuki bean	genic SSR	-	-	-	TTTTCCCCAATTCCCTAACC	TCACCCAATGCACACTTTGT	(AAAG)4	Chankaew et al. (2014)9
	VES0923	azuki bean	STS	241	241	-	GCACGAGGCTCACTCTTCTT	AGGTTTGGATTGATTGTCGC	-	Chankaew et al. (2014)9
	VES0928	azuki bean	genic SSR	130	130	-	CAAACGCATTGTGATTTTCG	ATACGCACCGTTTAGTTGGG	(AAAC)4	Chankaew et al. (2014)9
	VES0931	azuki bean	genic SSR	-	-	-	CTCGCTGGTGATCCATTCTA	CCCTCAGTTCGAAACTGCTC	(AG)8	Chankaew et al. (2014)9
	VES0932	azuki bean	genic SSR	388	388	-	AAAATGGGGTGGCTATTTCC	ATTGGAGGCAGGGTAGTGTG	(AAAG)4	Chankaew et al. (2014)9
	VES0939	azuki bean	genic SSR	479	479	-	TGACTTTCTTCACTGTGCCG	ATTGAGAGATGGAAATGGCG	(GGA)5	Chankaew et al. (2014)9
	VES0944	azuki bean	genic SSR	286	286	-	GCAAATTGAACAAGTGCAGC	AAGGACCGAGAGGATGGAAG	(AGC)5	Chankaew et al. (2014)9
	VES0948	azuki bean	genic SSR	-	-	-	AGAAAGCTGACCCAGCATGT	ACGCACTCGATCCTTCAAAT	(ATC)5	Chankaew et al. (2014)9
	VES0959	azuki bean	STS	-	-	-	GCACGAGGAGAATTCATTGG	GAACACAAGCGTTTGCTGAA	-	Chankaew et al. (2014)9
	VES0963	azuki bean	genic SSR	-	-	-	ATCATCAAGGCACGGTTTTC	CTTGATGAACCACCATTCCC	(GGC)5	Chankaew et al. (2014)9
	VES0966	azuki bean	genic SSR	143	143	-	GTTGCAAGATTGTGGGGACT	CTGCACCTTGTTGCTGTTGT	(AAG)5···(AGC)5	Chankaew et al. (2014)9
	VES0974	azuki bean	genic SSR	-	-	-	GGAGCATTCTGGGAATGAGA	AGCGGCAGTATCTGAAGCAT	(GGA)5	Chankaew et al. (2014)9
	VES0976	azuki bean	genic SSR	-	-	-	AGGAAGTTCAGGGCCAGATT	CCTCCACGCTGGATATCATT	(AAG)5	Chankaew et al. (2014)9
	VES0980	azuki bean	genic SSR	421	421	-	TACCACACATGCTGCCATCT	GGCCAACTGTTTGTCCCTTA	(AGC)7	Chankaew et al. (2014)9
	VES0983	azuki bean	genic SSR	135	135	-	ATCTGTTGCGGAGAATTTGG	ACGTGGGCAGCACTACTCTT	(ATC)5	Chankaew et al. (2014)9
	VES0987	azuki bean	genic SSR	300	300	-	GGGGCTAATGTGGGTCCTAT	TAGGAGGCCTGGCATACATC	(GGT)6···(GGT)5	Chankaew et al. (2014)9
	VES0991	azuki bean	STS	135	135	-	CCGTGGACTTGAACTTTGGT	GGTAGCACCCACACGAGATT	-	Chankaew et al. (2014)9
	VES0992	azuki bean	genic SSR	448	446	11	AGCTCAGAGAGCCAAGTCCA	AAACATTTTCAAGCAACGGG	(GGA)5	Chankaew et al. (2014)9
	VES0994	azuki bean	genic SSR	135	135	-	ATTCTCGATCACCAGCAACC	TGGAGAAGATGGTTCCCTTG	(AAT)5	Chankaew et al. (2014)9
	VES1001	azuki bean	genic SSR	218	222	11	GTTCCACCACCATTTGTTCC	GCCAAAAAGGACAACCTCAA	(AAC)5	Chankaew et al. (2014)9
	VES1005	azuki bean	genic SSR	179	179	-	TGCTCGACTGTTGGATTTGA	ATCCTAGGTCTCCAGGGCAT	(ATC)5	Chankaew et al. (2014)9
	VES1013	azuki bean	genic SSR	196	196	-	GAAAACCCTTCCACCAACAA	GGCAGCAAAAACACTGCATA	(AAC)5	Chankaew et al. (2014)9
	VES1017	azuki bean	genic SSR	136	136	-	TTTGAAGATGGTGGCATGAA	CTCCCTGATGACTTGGGAAA	(ATC)5	Chankaew et al. (2014)9
	VES1020	azuki bean	genic SSR	457	457	-	ATATTGGTGATGGGCAAGGA	GGACCGGTGAAGAATCAGAA	(AAC)5	Chankaew et al. (2014)9
	VES1021	azuki bean	genic SSR	221	221	-	GAGGTGCTAAAGCCACAAGC	CATCTGCTGGAAGCTCATCA	(AAG)5	Chankaew et al. (2014)9
	VES1023	azuki bean	genic SSR	134	134	-	CGCTTTCTTCACCCAAACAC	GCGAAACCTTCAGAAACTCG	(AAG)5	Chankaew et al. (2014)9
	VES1029	azuki bean	genic SSR	113	113	-	GAAGGGTCCGTGTCAATGAT	CAAGGCTCCGACTAAGATGC	(AAG)5	Chankaew et al. (2014)9
	VES1034	azuki bean	genic SSR	315	315	-	TTAGTTGGGCATTCTCTGGC	CGGTGGATATGGAGGTGGAT	(GGT)5···(GGC)7···(GGC)10	Chankaew et al. (2014)9
	VES1035	azuki bean	genic SSR	215	215	-	CAAAACCCCTCTCATTGCAT	TGATTTGGGTTTGTTGGGAT	(AAC)5	Chankaew et al. (2014)9
	VES1036	azuki bean	genic SSR	-	-	-	GAACTATGAGGGTGCCTGGA	AAATTTTGTGCAGTGGAGCC	(ATC)5	Chankaew et al. (2014)9
	VES1038	azuki bean	genic SSR	232	232	-	ACTGGGGAGCTAAGGATGGT	GGTTCCAAAGAAAAGGGGAC	(AAG)5	Chankaew et al. (2014)9
	VES1039	azuki bean	genic SSR	134	134	-	AGCATCTGGAGAGAAACCGA	TCAACAGCTACTGCAAGGCA	(AAG)5	Chankaew et al. (2014)9
	VES1047	azuki bean	genic SSR	326	326	-	TTTTGGCCTACCTTGTTTGC	TAATCGAACAAGCCGAATCC	(GGC)5	Chankaew et al. (2014)9
	VES1057	azuki bean	genic SSR	232	232	-	ACTTTACGAGGGCAGGGTTT	TAAACCGGGGACAGAAACTG	(AAC)5	Chankaew et al. (2014)9
	VES1061	azuki bean	genic SSR	-	-	-	GGCACTTCGTCTCCACACTT	GCCTCATAGGAGCCGTACAC	(GGC)5	Chankaew et al. (2014)9
	VES1064	azuki bean	genic SSR	-	-	-	TCCCAGCAAAGACATCAACA	CGAGTGTGCCCTTGAGGTAT	(GGA)5···(ATC)5···(ATC)7	Chankaew et al. (2014)9
	VES1067	azuki bean	genic SSR	484	484	-	GCAATTAACCTCGAACCCAA	TGCTTTTGGCAGAGAAGGAT	(AGC)5	Chankaew et al. (2014)9
	VES1082	azuki bean	genic SSR	135	135	-	TCTGGAAGCTTCTCTACCGC	TCCATGGACCTGAGGAAGTC	(AAC)9···(AAC)8	Chankaew et al. (2014)9
	VES1083	azuki bean	STS	-	-	-	ACGAGGCACCCTCATTACAC	TTTGAAAGGGAACCTGTTGG	-	Chankaew et al. (2014)9
	VES1084	azuki bean	genic SSR	-	-	-	CATCAATTGTGTCTGGCAGG	TATTGATGGTGGGAACAGCA	(AAG)5	Chankaew et al. (2014)9
	VES1085	azuki bean	genic SSR	260	260	-	TGTTCGATGTAACACGCCAT	GGGGCACAACCAATTTAAGA	(ATC)5	Chankaew et al. (2014)9
	VES1088	azuki bean	genic SSR	-	-	-	GGGGGAAGTGGTGGTACATA	CCCTTAACAAGTCTCTGGCG	(AAT)5	Chankaew et al. (2014)9
	VES1091	azuki bean	genic SSR	-	-	-	CAACCGCTGGTGTTAATCTG	AGCCTTTGCACCTGATGTCT	(AAG)5	Chankaew et al. (2014)9
	VES1098	azuki bean	genic SSR	307	307	-	CAGTGCCTAAGTCAGCACCA	TGGCATAAGGTACTATGAATTGAA	(GGT)5	Chankaew et al. (2014)9
	VES1101	azuki bean	genic SSR	-	-	-	TTGAGACAGTGGTCTGCCTG	TCTACGGCGTTTGATGAGTG	(GGC)5	Chankaew et al. (2014)9
	VES1104	azuki bean	genic SSR	-	-	-	TCAATCTTCCAAAACCCAGG	AGGGAAAGTCGAGGTGGAAT	(AAG)5	Chankaew et al. (2014)9
	VES1106	azuki bean	genic SSR	-	-	-	AAAAGTTGCGTCCAAAATGG	AGTGCTTTTGCCTGTCTGGT	(ATC)5	Chankaew et al. (2014)9
	VES1108	azuki bean	genic SSR	-	-	-	GCAGAGATGCCACTGCTGTA	GAAGGAAGCGAATGACGG	(GGA)5	Chankaew et al. (2014)9
	VES1110	azuki bean	genic SSR	-	-	-	CATCTTCTCATTTTGCCCGT	GGAAGATGGCAGAAGCACTC	(AAG)5	Chankaew et al. (2014)9
	VES1122	azuki bean	genic SSR	440	440	-	GGGATAGTGGCAATAGCGAA	TCAGCCGTCCTTCTGAATCT	(ATC)5	Chankaew et al. (2014)9
	VES1131	azuki bean	genic SSR	539	539	-	ACTGTCGATCCCGTCAAAAC	TTTTGCAGTGCATTTCTTGC	(AGC)5	Chankaew et al. (2014)9
	VES1133	azuki bean	genic SSR	284	284	-	CCAAACACAAAATAACGACCA	CATCAATGGTGACAACCTCG	(AAG)5	Chankaew et al. (2014)9
	VES1138	azuki bean	genic SSR	518	518	-	AAGGCACCTCAGTATGCACC	CAGCAGATGATGAAAAGCCA	(AAG)5	Chankaew et al. (2014)9
	VES1147	azuki bean	genic SSR	-	-	-	AACCAAACCAAACAAGGCAG	AAGGAACCTCCAACTTCGGT	(AAG)5	Chankaew et al. (2014)9
	VES1149	azuki bean	genic SSR	524	524	-	AAGTATTGGGGACCCTCCAC	ACCTTCCATGTTGGTGGTGT	(AAG)5	Chankaew et al. (2014)9
	VES1150	azuki bean	genic SSR	187	187	-	TGGCTTCAACACTTGCATTC	GTCATCGAAGGACTTGGTGG	(AGC)5	Chankaew et al. (2014)9
	VES1152	azuki bean	genic SSR	233	233	-	CCACCCACGTAGCAAGAAAT	CACATTGTGGAAACCACACG	(AGC)5	Chankaew et al. (2014)9
	VES1156	azuki bean	genic SSR	447	447	-	CCTTTCCTTCCTCATCCTCC	GAGAAAGCGAAGTTTCGTGG	(GGA)5	Chankaew et al. (2014)9
	VES1159	azuki bean	genic SSR	-	-	-	GGACGCATCCTCTTTCACTC	ATTCTGTTGGAGCTAGCGGA	(ATC)5	Chankaew et al. (2014)9
	VES1168	azuki bean	genic SSR	185	185	-	CAAGGCCATCTTCTCCCATA	GCCTTGAGCCTTGTGATGTT	(ATC)5	Chankaew et al. (2014)9
	VES1170	azuki bean	STS	172	172	-	GCACGAGGCTCTCTCTCTCT	ATCCCTCTTGCTGTTCCCTT	-	Chankaew et al. (2014)9
	VES1171	azuki bean	genic SSR	-	-	-	AACATGGCATTTCCTTTTGC	GCACTGATCACCCAGATCCT	(AT)36	Chankaew et al. (2014)9
	VES1172	azuki bean	genic SSR	183	183	-	CTCAACGCCTCAACCTTCTC	CCTTCTCTTCGGTGAAGTCG	(AG)35	Chankaew et al. (2014)9
	VES1173	azuki bean	genic SSR	170	170	-	CGGGTGATGAAGAATTGGAT	CCAAATATCCAGAGCTCCCA	(AAG)23	Chankaew et al. (2014)9
	VES1175	azuki bean	STS	194	194	-	GGGTTACAAAGCCCTTTTGAG	AAGAAGCGAGAAGGGAGAGG	-	Chankaew et al. (2014)9
	VES1176	azuki bean	genic SSR	301	301	-	CAAGCTTCAAGGCCAAAGTC	CATCGTCAAGCTCCTTGTCA	(AAG)12	Chankaew et al. (2014)9
	VES1177	azuki bean	genic SSR	282	282	-	GAGCTAGTTGGTGGGGAACA	TGCCTGAATGTGTGGTTCAT	(ATC)11	Chankaew et al. (2014)9
	VES1178	azuki bean	genic SSR	266	266	-	GCAAATCAGGCTCAAAAAGC	CCTCCTACAAGGCCAGTGAG	(AAGC)6	Chankaew et al. (2014)9
	VES1179	azuki bean	genic SSR	-	-	-	CATAGCAATCAGCAGCAGGA	GGAGGAAAACCCAGACACAA	(GGCT)6···(AAAG)5	Chankaew et al. (2014)9
	VES1181	azuki bean	genic SSR	-	-	-	GGAGTTTGGAAGAAGGAGGG	AACGTGGGCAAAAGAAAATG	(AG)13	Chankaew et al. (2014)9
	VES1182	azuki bean	STS	-	-	-	GGGAAACATCGAAGTGATTGA	CTCAGACCATTGCACCCTTT	-	Chankaew et al. (2014)9
	VES1185	azuki bean	genic SSR	-	-	-	TTGGAAAACCCATTCAGTGC	TCGAAACGATAGGTTTTGGC	(AG)10	Chankaew et al. (2014)9
	VES1188	azuki bean	genic SSR	243	243	-	CCATCTCAAAGCCAAAGGAA	ACGTTGCTGATTAGTTGGGG	(AAC)8···(AAG)8	Chankaew et al. (2014)9
	VES1190	azuki bean	genic SSR	458	458	-	GTGTTGAAGGAGCATTGGGT	CACCACGTTGCTTCCAGTTA	(AGC)6	Chankaew et al. (2014)9
	VES1192	azuki bean	genic SSR	315	315	-	TTGTCCGGCTACCCTATCAC	ACATTCTGGTCAAGATCGCC	(AAG)7	Chankaew et al. (2014)9
	VES1194	azuki bean	genic SSR	175	175	-	AAAGATCTTCCTCGCCTTCC	ATCGCCGAGCTTCTTGACTA	(AAG)10	Chankaew et al. (2014)9
	VES1196	azuki bean	genic SSR	214	214	-	TTTGCCATCGAGTACCCTTC	AAAACCCTTTTGATTTGGGC	(ACG)9	Chankaew et al. (2014)9
	VES1197	azuki bean	genic SSR	-	-	-	GCAACGCAGAAGAAGAAACC	CCCTCAGCACTACCTTGAGC	(ACG)12	Chankaew et al. (2014)9
	VES1202	azuki bean	genic SSR	-	-	-	GCAATCTCTGATAGGATTTCGG	GTTGGGATGAGGAAGACGAA	(AG)11	Chankaew et al. (2014)9
	VES1205	azuki bean	genic SSR	187	187	-	CTCCAATCAAATTCCCTCCA	ACCAGATCTTGTCGGACTGG	(GGA)7	Chankaew et al. (2014)9
	VES1208	azuki bean	genic SSR	-	-	-	TTTCAGTGTTGTCTGAAAGAGGA	TCACTTGTGAGCGGAATGAG	(AG)11	Chankaew et al. (2014)9
	VES1218	azuki bean	genic SSR	412	412	-	AGCGAGACAGAGAGATCGGT	GTTGCCAGCGATAACACAGA	(AAG)8	Chankaew et al. (2014)9
	VES1220	azuki bean	genic SSR	374	374	-	GAGGAAGTGGAATAACGATCCA	AGAGGCGATTGAGACCAAGA	(AAT)6	Chankaew et al. (2014)9
	VES1221	azuki bean	genic SSR	372	393	3	ATGGATCGTGCTCAGCTTCT	ATGTTGACAGTGTTGCCGAG	(GGT)16···(GGT)5···(GGT)5···(GGT)6	Chankaew et al. (2014)9
	VES1227	azuki bean	genic SSR	312	312	-	CGAAACCCAAGAAGACGAAG	TGTAGTCCAGAAACCCCTGC	(ACG)6	Chankaew et al. (2014)9
	VES1231	azuki bean	genic SSR	129	129	-	GCCCCGATGACGACCTAA	ATTTCGGAGACCCATTTTCC	(GGC)5	Chankaew et al. (2014)9
	VES1232	azuki bean	genic SSR	298	298	-	TCACCTCCCTCAACATCTCC	CTCGAAGCTCTTGTTTCGCT	(GGC)6	Chankaew et al. (2014)9
	VES1234	azuki bean	genic SSR	272	272	-	ACCACCACCACCACAAACTT	CTTGCTGTCATTGTTTCCGA	(AGC)7	Chankaew et al. (2014)9
	VES1235	azuki bean	genic SSR	295	295	-	GTTGCTGGAAAGAAAGGTGC	CGTTCATTGGTGGTTGAACA	(GGA)5	Chankaew et al. (2014)9
	VES1238	azuki bean	genic SSR	-	-	-	CAACAATGGCAGAAAACCCT	CTCATGTTGCGGCAGAGTTA	(AAG)6	Chankaew et al. (2014)9
	VES1239	azuki bean	genic SSR	-	-	-	TCTCAAGAGCTCCATGCTCA	TCCAGAACAGGAATCTTGGC	(ACG)6	Chankaew et al. (2014)9
	VES1241	azuki bean	genic SSR	212	212	-	ATCACAATGGCATCTCTCCC	TCGGATTTGATCCAGGAGAC	(GGA)7	Chankaew et al. (2014)9
	VES1243	azuki bean	genic SSR	-	-	-	TCACTTCTCCCATTTTCCCA	TCTGTGCGCAGTAATAAGCG	(GGC)8	Chankaew et al. (2014)9
	VES1246	azuki bean	genic SSR	145	146	8	ACTCACCGCCTCACCAATAC	GGTGGTCTTCTCCATCGTGT	(AAAG)9	Chankaew et al. (2014)9
	VES1247	azuki bean	genic SSR	230	230	-	CCTCGTTTTTCTTCTTCCCC	GAGGTCCGTCCAGTGTTGAT	(AAG)7	Chankaew et al. (2014)9
	VES1248	azuki bean	genic SSR	247	259	2	GTGAGATCGTCCAGTCAGCA	AGCAGGAGACCCAGTAGCAA	(AGC)7	Chankaew et al. (2014)9
	VES1250	azuki bean	genic SSR	224	224	-	TGATTGAACGCAGTGAGTGAG	CGAGAGAGGAAAAGTGGTCG	(GAGC)5	Chankaew et al. (2014)9
	VES1253	azuki bean	genic SSR	278	278	-	GAGTCTCGTCCCCAGAAACA	ACACTCTTCCCTTCCCAGGT	(ATC)6	Chankaew et al. (2014)9
	VES1258	azuki bean	genic SSR	-	-	-	CATCACACTGCCAAACCAAC	TGAGACCACTGTCTGCCTTG	(ATC)6	Chankaew et al. (2014)9
	VES1260	azuki bean	genic SSR	-	-	-	CCAACCAACTAACCTCCGAA	ACAGGGAGCGAGAAGTTGAA	(AG)9	Chankaew et al. (2014)9
	VES1261	azuki bean	genic SSR	136	136	-	CACAGCTAGTGATGGCCAGA	CCCCTCCACCAAGTAGCATA	(AT)9	Chankaew et al. (2014)9
	VES1263	azuki bean	genic SSR	173	173	-	AGCTCTTACCAACTGCGCTC	CTCTTCTTCGTTCCACTGCC	(GGT)6···(GGC)5(GGT)5	Chankaew et al. (2014)9
	VES1268	azuki bean	genic SSR	228	228	-	CGGTGGCTAAAATTCTGCAT	GTCGGGACTAACGGAGATGA	(AAG)6	Chankaew et al. (2014)9
	VES1269	azuki bean	genic SSR	316	316	-	ATATCCCCATCTCCCCTTTG	AAGAAGCTGGCATGCCTTTA	(AAT)6	Chankaew et al. (2014)9
	VES1270	azuki bean	genic SSR	425	425	-	TTTGGAGTCCCTGATATGGC	ACCTATCCTCTGCCGATCCT	(GGT)9	Chankaew et al. (2014)9
	VES1271	azuki bean	genic SSR	307	307	-	ATCGAGTTCCTCCACACCAC	ATGCTCCTCCCAATCCTTCT	(AG)9	Chankaew et al. (2014)9
	VES1274	azuki bean	genic SSR	253	253	-	AACGGACAAAAACACAAGCC	GTCTGAGTCCTTTGGTTCGG	(AAT)8	Chankaew et al. (2014)9
	VES1278	azuki bean	genic SSR	392	392	-	CTTGCTCAGCCCTTCTATGG	AAATGGCCCGACTTGTAATG	(AAC)6	Chankaew et al. (2014)9
	VES1287	azuki bean	genic SSR	-	-	-	CAAAAGGGATGACCCAAAGA	ACTGTATCCGGAACTGGCTG	(AAAC)4	Chankaew et al. (2014)9
	VES1288	azuki bean	STS	135	135	-	GCACGAGGAGATGAGAAAACT	ACACCTCAGGAGCTTCAGGA	-	Chankaew et al. (2014)9
	VES1291	azuki bean	STS	-	-	-	CACGAGGAGAAAGCGAGACT	CTGCTTCTCTAGGGGTCGTG	-	Chankaew et al. (2014)9
	VES1292	azuki bean	STS	-	-	-	GCACGAGGCTTTCTTCTGTT	TAGGCCGTAGTCGCTTAGGA	-	Chankaew et al. (2014)9
	VES1293	azuki bean	genic SSR	-	-	-	GGTGCCCAGTCAGAAACACT	ACGCTGCGTTTGAGAAACTT	(AAAG)4	Chankaew et al. (2014)9
	VES1295	azuki bean	STS	-	-	-	TTTTTGGGTCACAACTATTCCA	CAGTGTTGGAGGCAAAGTAGG	-	Chankaew et al. (2014)9
	VES1296	azuki bean	genic SSR	-	-	-	CAAGAGATGGCTCTGGGAAG	CGCCACCACATTATGAACTG	(AG)11	Chankaew et al. (2014)9
	VES1297	azuki bean	genic SSR	-	-	-	GAAGCAGTTTTGTGTGCCAA	GTTCGCAGAAAGGCTACCAG	(AAGC)4	Chankaew et al. (2014)9
	VES1300	azuki bean	genic SSR	202	202	-	GTCACTCCTTCGGCAATCTC	GTGTGAACTCGCAACGACAT	(AAAG)4	Chankaew et al. (2014)9
	VES1301	azuki bean	genic SSR	-	-	-	TGACAGACTCCACGAACGAG	CGAAGAAAAGCGCGATAAAC	(AG)8	Chankaew et al. (2014)9
	VES1306	azuki bean	STS	-	-	-	ACGAGGCACCACTTCACTTC	GAGTCACGGCCATTCTTTGT	-	Chankaew et al. (2014)9
	VES1310	azuki bean	genic SSR	290	290	-	ATCAACCTATGCATGTGGCA	CATGCACTGAGGAGCACACT	(GGA)10···(AAC)5	Chankaew et al. (2014)9
	VES1311	azuki bean	genic SSR	265	265	-	GATTCCGAAACAGAATCCGA	CTTCCTCCATCTCTTCGTCG	(AAG)5	Chankaew et al. (2014)9
	VES1313	azuki bean	genic SSR	-	-	-	GTTAGCTTCAGTGCCTTCCG	CCAAATAATTCAGCAACGCA	(GGA)5	Chankaew et al. (2014)9
	VES1314	azuki bean	genic SSR	135	135	-	TCCATTGAACCAGCATCTTG	GAAGAGGATCTTCCTTGGGG	(AAG)5	Chankaew et al. (2014)9
	VES1325	azuki bean	genic SSR	231	213	-	GAACCAGGATGCTTCGGATA	GTTTTTCCTCACCACCCAAA	(AAG)5	Chankaew et al. (2014)9
	VES1326	azuki bean	genic SSR	221	221	-	CTATCCGAAACCGCAAAGAA	GAATGGACCTGGGCTGTTT	(AAG)5	Chankaew et al. (2014)9
	VES1330	azuki bean	genic SSR	179	179	-	CTCGCTTGATTAGCCCTCAC	TGCTGGTTCTGCATTTCAAG	(AAG)5	Chankaew et al. (2014)9
	VES1336	azuki bean	genic SSR	135	135	-	CAGCTCCACTCACATCCTCA	TGCACTAGCACCGACAGTTC	(AAG)5···(AAG)5	Chankaew et al. (2014)9
	VES1337	azuki bean	genic SSR	-	-	-	TGGCTCAACTTCATCAGCAC	TTGAAACCAAAAGACAGCAAAA	(AAG)5	Chankaew et al. (2014)9
	VES1339	azuki bean	genic SSR	-	-	-	TAGGTCATGCTTGGACCACA	ATAGGGTTCGTCTGGGGACT	(ATC)5	Chankaew et al. (2014)9
	VES1343	azuki bean	genic SSR	-	-	-	ACTTCACGCGTTACAATCCC	AAAACCCATTACACCACCCA	(GGA)10	Chankaew et al. (2014)9
	VES1346	azuki bean	genic SSR	180	180	-	TTCCCTATCCCACCTCCTTC	GTTCTCACACTCGCTGCGTA	(GGA)5	Chankaew et al. (2014)9
	VES1350	azuki bean	genic SSR	-	-	-	CACCTTCTCTTCAACCTCGC	TACACCCGGAAAAGAAGAGC	(AAC)5	Chankaew et al. (2014)9
	VES1357	azuki bean	genic SSR	-	-	-	GGAACATTTTCACACCAGGC	TCAATCACAAGTACTCGGCG	(AGC)5	Chankaew et al. (2014)9
	VES1358	azuki bean	genic SSR	211	211	-	CCAGGTTCCTTCCACCACTA	TTCAGCGTACTTTGTGTCGC	(AAC)5	Chankaew et al. (2014)9
	VES1363	azuki bean	genic SSR	-	-	-	AGTTGGATTCCTCGGCTTTT	AGCTCTGGAGTCCCAAGTGA	(ATC)5	Chankaew et al. (2014)9
	VES1374	azuki bean	STS	129	129	-	GGACATGGCGTTACAGCAA	CACGAGGGAGAAGAAGCAAC	-	Chankaew et al. (2014)9
	VES1376	azuki bean	genic SSR	-	-	-	CTTCGTCTCAGAATCCCTCG	TCGGATTCACTTCGATTTCC	(ATC)5	Chankaew et al. (2014)9
	VES1378	azuki bean	genic SSR	222	222	-	AATGGGATGGTGGTTCTCCT	ATCAATGCCTACATGGCACA	(GGT)7	Chankaew et al. (2014)9
	VES1379	azuki bean	genic SSR	-	-	-	CAGATTGTCCAAGCGAGACA	CTGTAGCCTCAGGCACTTCC	(AAG)5···(AAG)15	Chankaew et al. (2014)9
	VES1383	azuki bean	genic SSR	-	-	-	GTGGAGGTGGTTTTGCTGAT	TCTTGCACAGATTGTCTCGG	(AGC)5···(AGC)5	Chankaew et al. (2014)9
	VES1384	azuki bean	genic SSR	362	362	-	GCATTGATGGCTACTCCGAT	AATGTACCCTTCCATTCCCC	(ATC)5	Chankaew et al. (2014)9
	VES1391	azuki bean	genic SSR	-	-	-	GGGCAGTTGGATCAGTGTTT	TGGTCATCAAGAAGCTGTGC	(AAC)5	Chankaew et al. (2014)9
	VES1396	azuki bean	genic SSR	-	-	-	CCCTGGAAACTATGAAGGCA	TTACCAAACACCAGGCATCA	(AAG)5	Chankaew et al. (2014)9
	VES1403	azuki bean	genic SSR	-	-	-	TTTCTCAACTGGGAGGGTTG	TGTTCTGGCTCTCCGATTCT	(AAG)5	Chankaew et al. (2014)9
	VES1405	azuki bean	STS	-	-	-	GGATTTGGTCGATTCTCCCT	CAGCGTCTTCACGTGTGAGT	-	Chankaew et al. (2014)9
	VES1406	azuki bean	genic SSR	233	233	-	CCAAGAGTGGTGGTGGAAAT	GAGGGGTAAGCTTGAGGTCC	(GGT)6···(AGC)10···(AGC)7···(AAC)5	Chankaew et al. (2014)9
	VES1407	azuki bean	genic SSR	145	145	-	CCTGTATAGAACCGCCTCCA	ATGGTGGTGGAGGAGAACTG	(GGT)9···(GGT)7	Chankaew et al. (2014)9
	VES1414	azuki bean	genic SSR	302	302	-	GATTCGCAAAATCGAACCTG	ACTTGACTGAAGGCGATGCT	(GGA)5···(GGA)5	Chankaew et al. (2014)9
	VES1415	azuki bean	genic SSR	-	-	-	TTGTGGGGTGCTAGAAGGAG	ATCACAAGCACTGCAGCATC	(AATG)5	Chankaew et al. (2014)9
	VES1417	azuki bean	genic SSR	-	-	-	GAAGCACTCATGTCCCACAA	TCACAGTAACTCCACTTCAGCAA	(AAC)6	Chankaew et al. (2014)9
	VES1418	azuki bean	genic SSR	-	-	-	TGTTTTGGAAGCCTCGTTCT	TGCAGGGTGGTTCAATATCA	(AAG)8	Chankaew et al. (2014)9
	VES1425	azuki bean	genic SSR	-	-	-	GGATGGTGATGATCTGTCCC	ATCACCGCCCATATGTCATC	(AG)10	Chankaew et al. (2014)9
	VES1427	azuki bean	STS	-	-	-	GCACGAGGGTTAAACCAAAA	GTAGAACACAGTGCCAGCGA	-	Chankaew et al. (2014)9
	VES1432	azuki bean	genic SSR	-	-	-	TCCACGAGGTGGAGAAAGAC	TTTTCTCCGTCATACCTCCG	(GGA)7	Chankaew et al. (2014)9
	VES1433	azuki bean	genic SSR	-	-	-	AATCCCTTTGGATTTGGGTC	AACGAGGTCCCCCATTTAAC	(AAC)6	Chankaew et al. (2014)9
	VES1434	azuki bean	genic SSR	-	-	-	GCTATCATGCAGAGCAACCA	GGTCCACCCTCAAACTACCA	(GGA)6	Chankaew et al. (2014)9
	VES1435	azuki bean	genic SSR	-	-	-	CTTTTCCGCAGGTGTATGGT	CCCCACAATTTTCCATGTTC	(AAG)5	Chankaew et al. (2014)9
	VES1439	azuki bean	genic SSR	233	233	-	AAAACACCTCAATGGCGAAC	GGCTCCATTGGTTTTACCCT	(AAT)6	Chankaew et al. (2014)9
	VES1440	azuki bean	genic SSR	-	-	-	GTGGCTCCATCCGTGTCTAT	CAAAAAGAGCAATGCCAACA	(AAG)5···(ATC)6	Chankaew et al. (2014)9
	VES1441	azuki bean	genic SSR	303	303	-	ACCTCCAAATCCAGACCCTC	CAAGGAAGCTTGGGAGTGAG	(GGC)5···(GGT)7···(GGT)11···(GGA)6···(GGA)6	Chankaew et al. (2014)9
	VES1442	azuki bean	genic SSR	-	-	-	TCCCTCGAAGTCAGCTTCAT	TAACTCCGACCAGATTTGCC	(ACG)9	Chankaew et al. (2014)9
	VES1443	azuki bean	genic SSR	247	247	-	AACACCACCACCTTCTCTGG	TTGAAGCCAAGGGACATAGG	(GGA)7	Chankaew et al. (2014)9
	VES1445	azuki bean	genic SSR	249	249	-	AACTGGCCGAGATAGCTGAA	GGAGCAGTGCCTGTTCTTTC	(AGC)7	Chankaew et al. (2014)9
	VES1449	azuki bean	STS	-	-	-	GCACGAGGCACTTCAGTTCT	CTCTGTGGACGTTGAGTGGA	-	Chankaew et al. (2014)9
	VES1450	azuki bean	genic SSR	285	285	-	CCCCCTCATCCTCTACTTCC	TCCCATAAGGAAGCACTTGG	(ACG)6	Chankaew et al. (2014)9
	VES1457	azuki bean	genic SSR	296	296	-	TCTTGTTAGACCCAAACGCC	CGGTGAAAGAGGGTTTTTGA	(ACG)6	Chankaew et al. (2014)9
	VES1464	azuki bean	genic SSR	-	-	-	AATTCTGGTTGGCACAAAGC	TCGAACAAGCCTTTTGTCCT	(AAG)6	Chankaew et al. (2014)9
	VES1466	azuki bean	genic SSR	-	-	-	TGTATTCTCCCCACCACCAC	AGGTGGTGACTGCTCCTCAC	(GGT)6···(GGT)5···(GGT)7	Chankaew et al. (2014)9
	VES1469	azuki bean	genic SSR	147	147	-	CTCGGTCTGCATCATCAAAA	GAGCCATCTTCTCTGGTTGC	(AG)9···(AGC)6	Chankaew et al. (2014)9
	VES1474	azuki bean	genic SSR	-	-	-	CGAAGGAGAACAGGATGAGC	TCCTGATAAACTGGGTGCCT	(AAAG)4	Chankaew et al. (2014)9
	VES1476	azuki bean	genic SSR	136	136	-	ATGTTTTTATTGGCCAAGCG	CCGAAGCAAATAAAACCCAA	(AAAT)4	Chankaew et al. (2014)9
	VES1482	azuki bean	genic SSR	-	-	-	TTCCCTTTCGTGGTTGAATC	AGAAGGGAGGCCAGAGAGAG	(GGAT)4	Chankaew et al. (2014)9
	VES1498	azuki bean	genic SSR	268	268	-	GGTGAAACTCCCCAGAAACA	TTCTTCAAGCAAAGCGGACT	(AAG)5	Chankaew et al. (2014)9
	VES1504	azuki bean	genic SSR	-	-	-	ACCACTTCCAACGGCACTAC	GTGGATGCTGGGACTGATCT	(AAC)5	Chankaew et al. (2014)9
	VES1510	azuki bean	genic SSR	-	-	-	GGCCTAACCAACCTGACAAA	AAACGCTAGGGATGTTGGTG	(AGC)5	Chankaew et al. (2014)9
	VES1515	azuki bean	genic SSR	136	136	-	GGAAACCATGAATCACCACC	ATAAAATGGATCCGGATGGG	(GGT)5	Chankaew et al. (2014)9
	VES1521	azuki bean	genic SSR	-	-	-	ACATTCTGGACGCGGATAAG	ACGAGATGAAAGGGAGAGCA	(AAG)8···(ATC)5	Chankaew et al. (2014)9
	VES1525	azuki bean	genic SSR	224	224	-	ATCCGTGGACTTTGACCTTG	ACGGCTTTTAACAGGAGGGT	(ATC)5	Chankaew et al. (2014)9
	VES1526	azuki bean	genic SSR	-	-	-	TGTTGCGGAGGTTTCTCTCT	GGACCTTCGGGATGGTCTAT	(GGC)5	Chankaew et al. (2014)9
	VES1527	azuki bean	genic SSR	-	-	-	GCAGCTTGGAGTGTAGGGAG	GTGCACATGATGACACACCA	(AAT)5	Chankaew et al. (2014)9
	VES1528	azuki bean	genic SSR	-	-	-	TGGTGCTCTTTTTGATGCTG	CAAATGGGTTTCGAAAATGG	(AGC)5	Chankaew et al. (2014)9
	VES1538	azuki bean	STS	-	-	-	CTGGGCGTAATAGCGAAGAG	AGACGATGTGTCGTGCAGTC	-	Chankaew et al. (2014)9
	VES1539	azuki bean	STS	-	-	-	TGCAGGGCTTAATTCCATTC	AAGATCTGCAAGGGGAGGAT	-	Chankaew et al. (2014)9
	VES1540	azuki bean	genic SSR	229	229	-	CCTGCATGTGTTCCCCTACT	GATGAGAACTGGGCCGAATA	(AAC)5	Chankaew et al. (2014)9
	VES1541	azuki bean	genic SSR	476	476	-	GCCGATCAGGACAGAGCTAC	ACTCAATTGGATCCACCAGC	(ATC)5	Chankaew et al. (2014)9
	VES1550	azuki bean	genic SSR	303	303	-	TGAGGCAGAAAGCATTGAAA	CACGATGAATTGGATGTTGG	(ATC)5	Chankaew et al. (2014)9
	a -: not amplified
	1 Wang XW, Kaga A, Tomooka N and Vaughan DA (2004). The development of SSR markers by a new method in plants and their application to gene flow studies in azuki bean [Vigna angularis (Willd.) Ohwi & Ohashi. Theoretical and Applied Genetics 109: 352-360.
	2 Kaga A, Isemura T, Tomooka N and Vaughan DA (2008). The genetics of domestication of the azuki bean (Vigna angularis). Genetics 178: 1013-1036.
	3 Kongjaimun A, Kaga A, Tomooka N, Somta P, Shimizu T, Shu Y, Isemura T, Vaughan DA and Srinives P (2012). An SSR-based linkage map of yardlong bean (Vigna unguiculata (L.) Walp. subsp. unguiculata Sesquipedalis Group) and QTL analysis of pod length. Genome 55: 81-92.
	4 Li CD, Fatokun CA, Ubi B, Singh BB and Scoles GJ (2001). Determining genetic similarities and relationships among cowpea breeding lines and cultivars by microsatellite markers. Crop Science 41: 189-197.
	5 Yu K, Park SJ, Poysa V and Gepts P (2000). Integration of simple sequence repeat (SSR) markers into a molecular linkage map of common bean (Phaseolus vulgaris L.). Journal of Heredity 91: 429–434.
	6 Gaitán-Solís E, Duque MC, Edwards KJ and Tohme J (2002). Microsatellite repeats in common bean (Phaseolus vulgaris): isolation, characterization, and cross-species amplification in Phaseolus ssp. Crop Science 42: 2128–2136.
	7 Blair MW, Pedraza F, Buendia HF, Gaitán-Solís E, Beebe SE, Gepts P, Tohme J (2003). Development of a genomewide anchored microsatellite map for common bean (Phaseolus vulgaris L.). Theoretical and Applied Genetics 107: 1362–1374.
	8 Guerra-Sanz JM (2004). New SSR markers of Phaseolus vulgaris from sequence databases. Plant Breeding 123: 87–89.
	9 Chankaew S, Isemura T, Isobe S, Kaga A, Tomooka N, Somta P, Hirakawa H, Shirasawa K, Vaughan DA and Srinives P (2014). Detection of genome donor species of neglected tetraploid crop Vigna reflexo-pilosa (créole bean), and genetic structure of diploid species based on newly developed EST-SSR markers from azuki bean (Vigna angularis). PLOS ONE 9(8) e104990.
